# Supplementary material for: Driving mechanisms of organic carbon burial in the Early CretaceousSouth Atlantic Cape Basin (DSDP Site 361)
Source: Copernicus journal article supplement (doi:10.5194/cp-2020-15), 2020-03-04
Supplement: Supplementary file 1 [file cp-2020-15_Dummann_et_al_S3.xlsx]

## Sheet: Karoo Supergroup
Group	Rock type	Reference	SiO2 [%]	Al2O3 [%]	K2O [%]	TiO2 [%]	Si [%]	Al [%]	K [%]	Ti [%]	La [ppm]	Th [ppm]	Sc [ppm]	Zr [ppm]	K/Al	Si/Al	Zr/Sc	Th/Sc	Ti/Zr [*10-4]	La/Sc
Ecca	mudstone	Andersson et al. (2004)	55.79	19.69	4.54	1.02	26.0848	10.4205	3.76887	0.611336	35.6	19.6	20	221	0.361679	2.50323	11.05	0.98	27.6623	1.78
Ecca	mudstone	Andersson et al. (2004)	52.57	21.84	5.23	1.29	24.5793	11.5583	4.34168	0.77316	53.5	24.2	26	247	0.375632	2.12655	9.5	0.930769	31.302	2.05769
Ecca	mudstone	Andersson et al. (2004)	49.57	23.5	6.04	1.31	23.1767	12.4368	5.0141	0.785147	57.5	26.9	27	255	0.403165	1.86355	9.44444	0.996296	30.7901	2.12963
Ecca	mudstone	Andersson et al. (2004)	57.65	18.62	3.94	1.04	26.9545	9.85421	3.27079	0.623323	60.9	19.9	19	242	0.331918	2.73533	12.7368	1.04737	25.7571	3.20526
Ecca	mudstone	Andersson et al. (2004)	56.13	19.76	4.63	1.03	26.2438	10.4575	3.84359	0.617329	50	19.7	18	226	0.367543	2.50956	12.5556	1.09444	27.3155	2.77778
Ecca	mudstone	Andersson et al. (2004)	57.79	18.43	4.08	1.13	27.02	9.75366	3.38701	0.677264	54.5	23.8	20	268	0.347255	2.77024	13.4	1.19	25.2711	2.725
Ecca	mudstone	Andersson et al. (2004)	56.99	18.87	4.63	1.39	26.6459	9.98652	3.84359	0.833095	65.8	31.2	25	291	0.384878	2.66819	11.64	1.248	28.6287	2.632
Ecca	mudstone	Andersson et al. (2004)	60.46	18.11	4.46	0.88	28.2683	9.5843	3.70246	0.527427	41	18	15	168	0.386305	2.94944	11.2	1.2	31.3945	2.73333
Ecca	mudstone	Andersson et al. (2004)	57.38	19.64	5.22	0.9	26.8283	10.394	4.33338	0.539414	45.5	20.7	18	155	0.41691	2.58112	8.61111	1.15	34.8009	2.52778
Ecca	mudstone	Andersson et al. (2004)	58.09	19.07	4.71	0.93	27.1602	10.0924	3.91	0.557395	39.3	18.9	19	163	0.387422	2.69117	8.57895	0.994737	34.196	2.06842
Ecca	mudstone	Andersson et al. (2004)	59.08	19.02	4.76	0.93	27.6231	10.0659	3.95151	0.557395	35.3	19.4	17	163	0.392564	2.74422	9.58824	1.14118	34.196	2.07647
Ecca	mudstone	Andersson et al. (2004)	58.24	19.03	4.96	0.86	27.2303	10.0712	4.11754	0.51544	42.1	19.2	18	147	0.408843	2.70379	8.16667	1.06667	35.064	2.33889
Ecca	mudstone	Andersson et al. (2004)	64.88	15.19	3.32	0.77	30.3349	8.03896	2.75609	0.461499	40.1	15.3	13	179	0.342842	3.77349	13.7692	1.17692	25.782	3.08462
Ecca	mudstone	Andersson et al. (2004)	59.86	17.98	4.62	0.82	27.9878	9.5155	3.83529	0.491466	48.3	18.1	16	154	0.403057	2.94128	9.625	1.13125	31.9134	3.01875
Ecca	mudstone	Andersson et al. (2004)	56.44	20.95	6	0.73	26.3888	11.0873	4.98089	0.437525	31.1	18.2	18	122	0.449243	2.38009	6.77778	1.01111	35.8627	1.72778
Ecca	mudstone	Andersson et al. (2004)	58.03	19.08	5.02	0.86	27.1322	10.0977	4.16735	0.51544	57.9	21	17	169	0.412704	2.68698	9.94118	1.23529	30.4994	3.40588
Ecca	mudstone	Andersson et al. (2004)	60.9	17.39	4.22	0.9	28.474	9.20326	3.50323	0.539414	56.7	19.2	16	189	0.380651	3.09391	11.8125	1.2	28.5404	3.54375
Ecca	mudstone	Andersson et al. (2004)	59.12	18.44	4.72	0.92	27.6418	9.75895	3.9183	0.551401	46	19.7	17	157	0.401509	2.83246	9.23529	1.15882	35.1211	2.70588
Ecca	mudstone	Andersson et al. (2004)	58.94	18.79	4.81	0.9	27.5576	9.94418	3.99301	0.539414	47.3	21.1	17	171	0.401543	2.77123	10.0588	1.24118	31.5447	2.78235
Ecca	mudstone	Andersson et al. (2004)	57.34	19.51	5.03	0.93	26.8096	10.3252	4.17565	0.557395	45.1	21.5	19	169	0.404412	2.59651	8.89474	1.13158	32.9819	2.37368
Ecca	mudstone	Andersson et al. (2004)	59.73	18.41	4.58	0.94	27.927	9.74307	3.80208	0.563388	49.9	20.1	18	170	0.390234	2.86634	9.44444	1.11667	33.1405	2.77222
Ecca	mudstone	Andersson et al. (2004)	61.99	17.12	4.21	0.84	28.9837	9.06037	3.49493	0.503453	48.5	16	15	161	0.385738	3.19895	10.7333	1.06667	31.2704	3.23333
Ecca	mudstone	Andersson et al. (2004)	62.48	16.98	4.09	0.82	29.2128	8.98628	3.39531	0.491466	42.2	17.1	14	154	0.377833	3.25082	11	1.22143	31.9134	3.01429
Ecca	mudstone	Andersson et al. (2004)	60.29	17.87	4.49	0.82	28.1888	9.45729	3.72737	0.491466	41.9	18.3	16	154	0.394126	2.98065	9.625	1.14375	31.9134	2.61875
Ecca	mudstone	Andersson et al. (2004)	60.37	18.13	4.05	0.91	28.2262	9.59489	3.3621	0.545408	43.1	18.9	17	165	0.350406	2.9418	9.70588	1.11176	33.055	2.53529
Ecca	mudstone	Andersson et al. (2004)	58.67	18.95	4.44	0.92	27.4314	10.0289	3.68586	0.551401	43.3	17.4	17	156	0.367526	2.73525	9.17647	1.02353	35.3462	2.54706
Ecca	mudstone	Andersson et al. (2004)	57.19	19.6	5.04	0.98	26.7394	10.3729	4.18395	0.587362	45.6	21.3	18	182	0.403356	2.57783	10.1111	1.18333	32.2726	2.53333
Ecca	mudstone	Andersson et al. (2004)	59.35	18.79	4.44	0.98	27.7493	9.94418	3.68586	0.587362	46.4	20.1	18	178	0.370655	2.79051	9.88889	1.11667	32.9979	2.57778
Ecca	mudstone	Andersson et al. (2004)	62.37	16.59	3.74	0.83	29.1613	8.77988	3.10476	0.49746	46.5	19.2	14	172	0.353622	3.32138	12.2857	1.37143	28.9221	3.32143
Ecca	mudstone	Andersson et al. (2004)	57.71	19.7	4.83	0.95	26.9825	10.4258	4.00962	0.569381	46.6	20.4	18	158	0.384587	2.58806	8.77778	1.13333	36.0368	2.58889
Ecca	mudstone	Andersson et al. (2004)	61.97	17.22	4.04	0.84	28.9743	9.11329	3.3538	0.503453	40.5	17.6	14	165	0.368012	3.17935	11.7857	1.25714	30.5123	2.89286
Ecca	mudstone	Andersson et al. (2004)	58.48	19.14	4.8	1.01	27.3426	10.1294	3.98471	0.605342	42.6	22.2	19	170	0.393381	2.69932	8.94737	1.16842	35.6084	2.24211
Ecca	mudstone	Andersson et al. (2004)	58.68	19.14	5	0.86	27.4361	10.1294	4.15074	0.51544	39.9	19.7	18	140	0.409772	2.70856	7.77778	1.09444	36.8171	2.21667
Ecca	mudstone	Andersson et al. (2004)	61.85	17.28	4.12	0.93	28.9182	9.14505	3.42021	0.557395	48.9	17.9	16	171	0.373996	3.16217	10.6875	1.11875	32.5962	3.05625
Ecca	mudstone	Andersson et al. (2004)	58.48	19.06	4.84	0.94	27.3426	10.0871	4.01792	0.563388	49	19.4	17	155	0.398324	2.71065	9.11765	1.14118	36.3476	2.88235
Ecca	mudstone	Andersson et al. (2004)	57.95	19.48	4.85	0.91	27.0948	10.3093	4.02622	0.545408	42.7	19.2	18	145	0.390541	2.62817	8.05556	1.06667	37.6143	2.37222
Ecca	mudstone	Andersson et al. (2004)	60.11	18.01	4.26	0.96	28.1047	9.53138	3.53643	0.575375	43.9	20.4	17	185	0.371031	2.94865	10.8824	1.2	31.1014	2.58235
Ecca	mudstone	Andersson et al. (2004)	58.64	19.14	4.95	0.94	27.4174	10.1294	4.10924	0.563388	54.2	22.5	19	163	0.405674	2.70671	8.57895	1.18421	34.5637	2.85263
Ecca	mudstone	Andersson et al. (2004)	57.41	20.28	5.63	0.76	26.8423	10.7327	4.67374	0.455505	31.4	15.6	19	118	0.435466	2.50097	6.21053	0.821053	38.6021	1.65263
Ecca	mudstone	Andersson et al. (2004)	56.13	20.55	5.4	0.83	26.2438	10.8756	4.4828	0.49746	34.4	22.2	20	137	0.412188	2.41309	6.85	1.11	36.3109	1.72
Ecca	mudstone	Andersson et al. (2004)	61.11	17.37	4.22	0.91	28.5722	9.19268	3.50323	0.545408	46.5	18.2	16	171	0.381089	3.10815	10.6875	1.1375	31.8952	2.90625
Ecca	mudstone	Andersson et al. (2004)	59.19	18.46	4.55	0.91	27.6745	9.76953	3.77718	0.545408	46.2	17.8	17	162	0.386628	2.83274	9.52941	1.04706	33.6671	2.71765
Ecca	mudstone	Andersson et al. (2004)	57.88	19.37	5	0.82	27.062	10.2511	4.15074	0.491466	36.9	17.9	16	134	0.404906	2.63991	8.375	1.11875	36.6766	2.30625
Ecca	mudstone	Andersson et al. (2004)	60.64	17.83	4.44	0.91	28.3525	9.43612	3.68586	0.545408	42.7	18.4	17	161	0.390612	3.00468	9.47059	1.08235	33.8762	2.51176
Ecca	mudstone	Andersson et al. (2004)	62.76	16.53	3.76	0.8	29.3437	8.74812	3.12136	0.479479	43.8	16.1	14	143	0.356803	3.35428	10.2143	1.15	33.53	3.12857
Ecca	mudstone	Andersson et al. (2004)	62.88	16.59	3.85	0.86	29.3998	8.77988	3.19607	0.51544	46.8	18.2	15	167	0.364022	3.34854	11.1333	1.21333	30.8647	3.12
Ecca	mudstone	Andersson et al. (2004)	54.71	21.88	6.03	0.78	25.5799	11.5795	5.0058	0.467492	37.2	22.2	21	165	0.432299	2.20907	7.85714	1.05714	28.3329	1.77143
Ecca	mudstone	Andersson et al. (2004)	57.99	20.15	5.16	0.8	27.1135	10.6639	4.28357	0.479479	34.9	19.5	18	138	0.401688	2.54254	7.66667	1.08333	34.7449	1.93889
Ecca	mudstone	Andersson et al. (2004)	59.75	18.92	4.87	0.85	27.9364	10.013	4.04282	0.509447	40	19.3	17	127	0.403758	2.79001	7.47059	1.13529	40.1139	2.35294
Ecca	mudstone	Andersson et al. (2004)	61.06	18.01	4.52	0.84	28.5489	9.53138	3.75227	0.503453	40.2	17.5	16	138	0.393676	2.99525	8.625	1.09375	36.4821	2.5125
Ecca	mudstone	Andersson et al. (2004)	64.26	15.92	3.63	0.84	30.045	8.4253	3.01344	0.503453	48.5	14.7	14	151	0.357666	3.56605	10.7857	1.05	33.3413	3.46429
Ecca	mudstone	Andersson et al. (2004)	60.11	18.22	4.64	0.79	28.1047	9.64252	3.85189	0.473486	41.1	18.4	16	128	0.399469	2.91466	8	1.15	36.9911	2.56875
Ecca	mudstone	Andersson et al. (2004)	59.64	18.34	4.64	0.81	27.8849	9.70603	3.85189	0.485473	54.5	18.9	17	130	0.396855	2.87295	7.64706	1.11176	37.344	3.20588
Ecca	mudstone	Andersson et al. (2004)	56.24	21.38	5.64	0.7	26.2952	11.3149	4.68204	0.419544	35.3	22	18	149	0.413795	2.32395	8.27778	1.22222	28.1573	1.96111
Ecca	mudstone	Andersson et al. (2004)	57.63	20.13	5.05	0.62	26.9451	10.6533	4.19225	0.371596	24.6	19.4	17	122	0.393515	2.52927	7.17647	1.14118	30.4587	1.44706
Ecca	mudstone	Andersson et al. (2004)	60.46	18.47	4.71	0.72	28.2683	9.77483	3.91	0.431531	37.3	18.6	16	124	0.400007	2.89195	7.75	1.1625	34.8009	2.33125
Ecca	mudstone	Andersson et al. (2004)	59.2	19.45	4.97	0.67	27.6792	10.2935	4.12584	0.401564	37.6	17.4	16	118	0.400821	2.68901	7.375	1.0875	34.0308	2.35
Ecca	mudstone	Andersson et al. (2004)	58.93	19.01	4.8	0.66	27.553	10.0606	3.98471	0.39557	24.8	17.7	16	120	0.396071	2.7387	7.5	1.10625	32.9642	1.55
Ecca	mudstone	Andersson et al. (2004)	59.31	18.19	4.64	0.67	27.7306	9.62664	3.85189	0.401564	34.7	16.3	15	99	0.400128	2.88061	6.6	1.08667	40.562	2.31333
Ecca	mudstone	Andersson et al. (2004)	59.03	19.66	5	0.7	27.5997	10.4046	4.15074	0.419544	41.5	20.1	17	135	0.398933	2.65264	7.94118	1.18235	31.0774	2.44118
Ecca	mudstone	Andersson et al. (2004)	60.53	19.19	5.06	0.74	28.301	10.1559	4.20055	0.443518	52.2	20.6	18	151	0.413608	2.78667	8.38889	1.14444	29.3721	2.9
Ecca	mudstone	Andersson et al. (2004)	59.31	18.97	5.09	0.73	27.7306	10.0394	4.22546	0.437525	108.8	21.2	18	135	0.420886	2.76217	7.5	1.17778	32.4092	6.04444
Ecca	mudstone	Andersson et al. (2004)	58.69	19.52	5.56	0.73	27.4407	10.3305	4.61563	0.437525	50.6	24.8	18	149	0.446795	2.65628	8.27778	1.37778	29.3641	2.81111
Ecca	mudstone	Andersson et al. (2004)	58.54	18.59	4.94	0.79	27.3706	9.83833	4.10093	0.473486	46.1	18.3	18	128	0.416832	2.78204	7.11111	1.01667	36.9911	2.56111
Ecca	mudstone	Andersson et al. (2004)	54.47	20.56	5.35	0.69	25.4677	10.8809	4.4413	0.413551	54.4	19.4	18	117	0.408173	2.34058	6.5	1.07778	35.3462	3.02222
Ecca	mudstone	Andersson et al. (2004)	55.36	21.06	5.67	0.72	25.8838	11.1455	4.70694	0.431531	45.9	21.1	19	129	0.422317	2.32235	6.78947	1.11053	33.452	2.41579
Ecca	mudstone	Andersson et al. (2004)	51.83	23.25	6.46	0.98	24.2333	12.3045	5.36276	0.587362	53.3	26.3	23	171	0.435836	1.96946	7.43478	1.14348	34.3487	2.31739
Ecca	mudstone	Andersson et al. (2004)	56.28	20.94	5.37	1.17	26.3139	11.082	4.4579	0.701238	60.7	25.6	22	221	0.402264	2.37447	10.0455	1.16364	31.7302	2.75909
Ecca	mudstone	Andersson et al. (2004)	48.25	25.12	7.09	1.15	22.5595	13.2942	5.88575	0.689251	57.2	26.2	24	196	0.442731	1.69694	8.16667	1.09167	35.1659	2.38333
Ecca	mudstone	Andersson et al. (2004)	47.51	25.87	7.11	1.61	22.2135	13.6911	5.90236	0.964952	61.7	36.6	32	304	0.431109	1.62248	9.5	1.14375	31.7418	1.92813
Ecca	mudstone	Andersson et al. (2004)	49.13	24.27	6.7	1.17	22.9709	12.8443	5.562	0.701238	67.2	30.6	25	204	0.433031	1.78841	8.16	1.224	34.3744	2.688
Ecca	mudstone	Andersson et al. (2004)	64.91	16.17	2.64	0.74	30.3489	8.5576	2.19159	0.443518	54.6	16.4	12	197	0.256099	3.54643	16.4167	1.36667	22.5136	4.55
Ecca	mudstone	Andersson et al. (2004)	61.61	16.56	2.97	1.14	28.806	8.764	2.46554	0.683258	45.1	24.3	18	291	0.281326	3.28686	16.1667	1.35	23.4796	2.50556
Ecca	mudstone	Andersson et al. (2004)	50.7	22.15	5.52	1.98	23.705	11.7224	4.58242	1.18671	87	45.4	30	433	0.390912	2.0222	14.4333	1.51333	27.4067	2.9
Ecca	mudstone	Andersson et al. (2004)	53.12	22.14	5.29	1.23	24.8365	11.7171	4.39149	0.737199	65.5	26.8	24	228	0.374793	2.11968	9.5	1.11667	32.3333	2.72917
Ecca	mudstone	Andersson et al. (2004)	54.5	21.67	5.42	1.1	25.4817	11.4684	4.49941	0.659284	68.1	23	22	208	0.392332	2.22191	9.45455	1.04545	31.6963	3.09545
Ecca	mudstone	Andersson et al. (2004)	50.99	22.64	5.72	1.42	23.8406	11.9817	4.74845	0.851075	70.8	29	28	273	0.396308	1.98975	9.75	1.03571	31.1749	2.52857
Ecca	mudstone	Andersson et al. (2004)	51.66	23.33	6.26	1.18	24.1538	12.3469	5.19673	0.707232	68.4	27.6	22	199	0.420895	1.95627	9.04545	1.25455	35.5393	3.10909
Ecca	mudstone	Andersson et al. (2004)	50.38	24.3	6.72	1.19	23.5554	12.8602	5.5786	0.713225	64.7	28.1	25	186	0.433787	1.83165	7.44	1.124	38.3454	2.588
Ecca	mudstone	Andersson et al. (2004)	60.99	15.64	2.9	0.81	28.5161	8.27711	2.40743	0.485473	54.3	21.2	15	236	0.290854	3.44518	15.7333	1.41333	20.5709	3.62
Ecca	mudstone	Andersson et al. (2004)	56.31	20.62	5.18	0.86	26.328	10.9127	4.30017	0.51544	51	22.4	19	133	0.394053	2.41261	7	1.17895	38.7549	2.68421
Ecca	mudstone	Andersson et al. (2004)	58.6	19.25	4.7	0.91	27.3987	10.1876	3.9017	0.545408	55.5	22.8	19	176	0.382984	2.68941	9.26316	1.2	30.9891	2.92105
Ecca	mudstone	Andersson et al. (2004)	51.95	23.09	6.02	1.13	24.2894	12.2199	4.99749	0.677264	64.8	28.9	24	207	0.408965	1.9877	8.625	1.20417	32.7181	2.7
Ecca	mudstone	Andersson et al. (2004)	54.51	20.53	5.33	1.04	25.4864	10.865	4.42469	0.623323	107.4	27.7	21	176	0.407241	2.34572	8.38095	1.31905	35.4161	5.11429
Ecca	mudstone	Andersson et al. (2004)	56.61	19.5	4.84	0.82	26.4682	10.3199	4.01792	0.491466	47.7	21.5	18	130	0.389336	2.56477	7.22222	1.19444	37.8051	2.65
Ecca	mudstone	Andersson et al. (2004)	57.06	19.85	4.98	0.78	26.6786	10.5052	4.13414	0.467492	49.3	24	19	137	0.393534	2.53957	7.21053	1.26316	34.1235	2.59474
Ecca	mudstone	Andersson et al. (2004)	56.75	20.08	5.12	0.7	26.5337	10.6269	4.25036	0.419544	53.3	19	18	122	0.399963	2.49685	6.77778	1.05556	34.3889	2.96111
Ecca	mudstone	Andersson et al. (2004)	56.41	19.74	5.07	0.69	26.3747	10.4469	4.20885	0.413551	39.2	22.3	18	117	0.402879	2.52464	6.5	1.23889	35.3462	2.17778
Ecca	mudstone	Andersson et al. (2004)	55.98	17.11	4.03	0.68	26.1737	9.05508	3.3455	0.407557	94.4	18.2	15	106	0.369461	2.8905	7.06667	1.21333	38.4488	6.29333
Ecca	mudstone	Andersson et al. (2004)	56.63	17.81	4.31	0.73	26.4776	9.42554	3.57794	0.437525	98.1	21	16	106	0.379601	2.80913	6.625	1.3125	41.2759	6.13125
Ecca	mudstone	Andersson et al. (2004)	57.93	20.18	5.05	0.61	27.0854	10.6798	4.19225	0.365603	34.7	20.7	17	147	0.39254	2.53613	8.64706	1.21765	24.8709	2.04118
Ecca	mudstone	Andersson et al. (2004)	58.69	19.78	4.7	0.69	27.4407	10.4681	3.9017	0.413551	39.7	21.3	17	144	0.372722	2.62137	8.47059	1.25294	28.7188	2.33529
Ecca	mudstone	Andersson et al. (2004)	59.65	19.34	4.58	0.57	27.8896	10.2353	3.80208	0.341629	45.1	18.1	15	134	0.371469	2.72486	8.93333	1.20667	25.4947	3.00667
Ecca	mudstone	Andersson et al. (2004)	58.74	18.51	4.67	0.64	27.4641	9.79599	3.87679	0.383583	31	18.6	16	100	0.395753	2.80361	6.25	1.1625	38.3583	1.9375
Ecca	mudstone	Andersson et al. (2004)	59.59	18	4.39	0.73	27.8615	9.52609	3.64435	0.437525	39.6	20.5	17	112	0.382565	2.92476	6.58824	1.20588	39.0647	2.32941
Ecca	mudstone	Andersson et al. (2004)	60.2	18.5	4.11	0.57	28.1468	9.7907	3.41191	0.341629	29.6	17.5	15	115	0.348485	2.87485	7.66667	1.16667	29.7069	1.97333
Ecca	mudstone	Andersson et al. (2004)	56.94	20.17	5.37	0.6	26.6225	10.6745	4.4579	0.359609	37.1	20.1	18	129	0.417621	2.49403	7.16667	1.11667	27.8767	2.06111
Ecca	mudstone	Andersson et al. (2004)	60.93	17.46	4.06	0.94	28.4881	9.24031	3.3704	0.563388	20.1	18.5	16	163	0.36475	3.08302	10.1875	1.15625	34.5637	1.25625
Ecca	mudstone	Andersson et al. (2004)	59.65	18.03	4.35	0.98	27.8896	9.54197	3.61115	0.587362	58.4	18.4	17	167	0.378449	2.92284	9.82353	1.08235	35.1714	3.43529
Ecca	mudstone	Andersson et al. (2004)	58.86	18.65	4.43	1.01	27.5202	9.87009	3.67756	0.605342	43.4	18.1	18	181	0.372596	2.78825	10.0556	1.00556	33.4443	2.41111
Ecca	mudstone	Andersson et al. (2004)	60.8	17.57	3.95	0.93	28.4273	9.29852	3.27909	0.557395	30.2	18	16	180	0.352646	3.05718	11.25	1.125	30.9664	1.8875
Ecca	mudstone	Andersson et al. (2004)	60.48	18	4.2	0.89	28.2777	9.52609	3.48662	0.533421	28.2	17	16	157	0.366008	2.96845	9.8125	1.0625	33.9758	1.7625
Ecca	mudstone	Andersson et al. (2004)	69.07	13.12	2.45	0.67	32.294	6.94346	2.03386	0.401564	32.1	13	9	189	0.292918	4.65099	21	1.44444	21.2468	3.56667
Ecca	mudstone	Andersson et al. (2004)	65.03	15.81	3.28	0.85	30.405	8.36708	2.72289	0.509447	33.2	17.3	13	201	0.325429	3.63389	15.4615	1.33077	25.3456	2.55385
Ecca	mudstone	Andersson et al. (2004)	61.6	17.28	3.87	0.98	28.8013	9.14505	3.21268	0.587362	39.9	18.3	16	193	0.351302	3.14939	12.0625	1.14375	30.4333	2.49375
Ecca	mudstone	Andersson et al. (2004)	64.24	16.06	3.58	0.93	30.0357	8.49939	2.97193	0.557395	40.8	18.9	15	222	0.349664	3.53386	14.8	1.26	25.1079	2.72
Ecca	mudstone	Andersson et al. (2004)	61	17.73	4.14	0.95	28.5208	9.3832	3.43682	0.569381	34.2	18.3	17	186	0.366273	3.03956	10.9412	1.07647	30.6119	2.01176
Ecca	mudstone	Andersson et al. (2004)	65.61	15.17	3.12	0.85	30.6762	8.02838	2.59006	0.509447	42.1	16.2	12	227	0.322614	3.82097	18.9167	1.35	22.4426	3.50833
Ecca	mudstone	Andersson et al. (2004)	60	17.98	4.37	1.03	28.0532	9.5155	3.62775	0.617329	44.6	21.6	17	193	0.381246	2.94816	11.3529	1.27059	31.986	2.62353
Ecca	mudstone	Andersson et al. (2004)	62.21	16.79	3.91	0.93	29.0865	8.88572	3.24588	0.557395	29.9	18.9	15	178	0.365292	3.2734	11.8667	1.26	31.3143	1.99333
Ecca	mudstone	Andersson et al. (2004)	54.93	20.88	5.01	1.08	25.6827	11.0503	4.15904	0.647297	29.6	22.2	20	190	0.376375	2.32418	9.5	1.11	34.0683	1.48
Ecca	mudstone	Andersson et al. (2004)	59.29	17.97	4.02	1.01	27.7213	9.51021	3.3372	0.605342	38.3	20.7	16	211	0.350907	2.9149	13.1875	1.29375	28.6892	2.39375
Ecca	mudstone	Andersson et al. (2004)	62.74	16.61	3.71	0.92	29.3343	8.79046	3.07985	0.551401	39	16.2	15	183	0.350363	3.33706	12.2	1.08	30.1312	2.6
Ecca	mudstone	Andersson et al. (2004)	61.16	16.86	3.73	0.94	28.5956	8.92277	3.09645	0.563388	48.1	18.6	15	201	0.347028	3.20479	13.4	1.24	28.0293	3.20667
Ecca	mudstone	Andersson et al. (2004)	58.33	18.47	4.24	1.01	27.2724	9.77483	3.51983	0.605342	46.4	19	18	188	0.360091	2.79007	10.4444	1.05556	32.1991	2.57778
Ecca	mudstone	Andersson et al. (2004)	62.09	16.58	3.8	0.93	29.0304	8.77459	3.15456	0.557395	41	18.2	15	185	0.359512	3.30847	12.3333	1.21333	30.1294	2.73333
Ecca	mudstone	Andersson et al. (2004)	63.7	15.89	3.47	0.84	29.7832	8.40942	2.88062	0.503453	40.1	16.5	13	166	0.342546	3.54165	12.7692	1.26923	30.3285	3.08462
Ecca	mudstone	Andersson et al. (2004)	62.2	16.56	3.73	0.94	29.0819	8.764	3.09645	0.563388	59	19.7	15	175	0.353315	3.31833	11.6667	1.31333	32.1936	3.93333
Ecca	mudstone	Andersson et al. (2004)	65.88	14.86	3.33	0.76	30.8025	7.86432	2.76439	0.455505	34.2	13.6	12	158	0.351511	3.91674	13.1667	1.13333	28.8294	2.85
Ecca	mudstone	Andersson et al. (2004)	63.13	16.03	3.71	0.84	29.5167	8.48351	3.07985	0.503453	37.5	17.1	14	159	0.36304	3.4793	11.3571	1.22143	31.6637	2.67857
Ecca	mudstone	Andersson et al. (2004)	60.61	18.2	4.56	0.83	28.3385	9.63193	3.78548	0.49746	31.2	18.3	17	137	0.393013	2.94214	8.05882	1.07647	36.3109	1.83529
Ecca	mudstone	Andersson et al. (2004)	63.26	16.46	3.99	0.85	29.5775	8.71108	3.31229	0.509447	39.3	18.3	15	164	0.380239	3.39539	10.9333	1.22	31.0638	2.62
Ecca	mudstone	Andersson et al. (2004)	63.76	16.38	3.95	0.84	29.8112	8.66874	3.27909	0.503453	34.5	17.9	14	151	0.378266	3.43894	10.7857	1.27857	33.3413	2.46429
Ecca	mudstone	Andersson et al. (2004)	56.63	20.65	5.31	0.71	26.4776	10.9285	4.40809	0.425538	32.7	20.9	19	140	0.403356	2.42279	7.36842	1.1	30.3956	1.72105
Ecca	mudstone	Andersson et al. (2004)	59.26	19.01	4.54	0.67	27.7073	10.0606	3.76887	0.401564	33.9	18.7	17	104	0.374617	2.75403	6.11765	1.1	38.6119	1.99412
Ecca	mudstone	Andersson et al. (2004)	59.81	18.97	4.83	0.76	27.9644	10.0394	4.00962	0.455505	32.1	19.5	17	120	0.399387	2.78546	7.05882	1.14706	37.9588	1.88824
Ecca	mudstone	Andersson et al. (2004)	61.39	17.63	4.35	0.81	28.7031	9.33027	3.61115	0.485473	33.1	20	16	125	0.387035	3.07635	7.8125	1.25	38.8378	2.06875
Ecca	mudstone	Andersson et al. (2004)	58.03	17.67	4.24	0.69	27.1322	9.35144	3.51983	0.413551	86.4	19.7	16	117	0.376394	2.90139	7.3125	1.23125	35.3462	5.4
Ecca	mudstone	Andersson et al. (2004)	60.13	18.81	4.46	0.62	28.114	9.95476	3.70246	0.371596	34.1	16.5	16	129	0.371929	2.82418	8.0625	1.03125	28.8059	2.13125
Ecca	mudstone	Andersson et al. (2004)	59.29	18.49	4.6	0.66	27.7213	9.78541	3.81868	0.39557	36.8	16.2	16	98	0.390243	2.83292	6.125	1.0125	40.3643	2.3
Ecca	mudstone	Andersson et al. (2004)	59.45	19.59	4.85	0.69	27.7961	10.3676	4.02622	0.413551	37.7	18.5	17	141	0.388348	2.68106	8.29412	1.08824	29.3298	2.21765
Ecca	mudstone	Andersson et al. (2004)	60.42	18.95	5.21	0.58	28.2496	10.0289	4.32507	0.347622	47.6	27.6	11	171	0.431263	2.81683	15.5455	2.50909	20.3288	4.32727
Ecca	mudstone	Andersson et al. (2004)	58.53	18.18	4.03	1.2	27.3659	9.62135	3.3455	0.719219	56.6	24.1	21	291	0.347716	2.84429	13.8571	1.14762	24.7154	2.69524
Ecca	mudstone	Andersson et al. (2004)	59.84	18.42	4.52	0.97	27.9784	9.74836	3.75227	0.581368	44.1	17.1	17	218	0.384913	2.87006	12.8235	1.00588	26.6683	2.59412
Ecca	mudstone	Andersson et al. (2004)	59.7	18.45	4.85	0.8	27.913	9.76424	4.02622	0.479479	36.4	22.6	17	146	0.412343	2.85869	8.58824	1.32941	32.841	2.14118
Ecca	mudstone	Andersson et al. (2004)	64.15	15.76	3.37	0.68	29.9936	8.34062	2.7976	0.407557	33.2	14	11	222	0.335419	3.59609	20.1818	1.27273	18.3584	3.01818
Ecca	mudstone	Andersson et al. (2004)	54.05	21.75	6.41	0.88	25.2713	11.5107	5.32125	0.527427	35.8	24.2	24	165	0.462288	2.19546	6.875	1.00833	31.9653	1.49167
Ecca	mudstone	Andersson et al. (2004)	56.58	19.81	5.32	0.68	26.4542	10.484	4.41639	0.407557	40.4	19.4	19	129	0.421251	2.5233	6.78947	1.02105	31.5936	2.12632
Ecca	mudstone	Andersson et al. (2004)	52.05	23.03	6.85	0.9	24.3362	12.1881	5.68652	0.539414	39.8	23.2	22	160	0.466563	1.99672	7.27273	1.05455	33.7134	1.80909
Ecca	mudstone	Andersson et al. (2004)	61.53	17.89	4.25	0.87	28.7686	9.46787	3.52813	0.521434	45.9	18.6	17	162	0.372642	3.03855	9.52941	1.09412	32.1873	2.7
Ecca	mudstone	Andersson et al. (2004)	57.51	20.18	5.8	0.9	26.889	10.6798	4.81486	0.539414	46.5	21.9	19	153	0.450838	2.51775	8.05263	1.15263	35.2558	2.44737
Ecca	mudstone	Andersson et al. (2004)	64.37	16.55	4.01	0.78	30.0965	8.75871	3.3289	0.467492	44.4	18.6	14	136	0.380067	3.43617	9.71429	1.32857	34.3744	3.17143
Ecca	mudstone	Andersson et al. (2004)	59.82	18.79	5.08	0.82	27.9691	9.94418	4.21715	0.491466	40.6	18.3	17	144	0.424083	2.81261	8.47059	1.07647	34.1296	2.38824
Ecca	mudstone	Andersson et al. (2004)	57.66	19.28	5.3	0.77	26.9592	10.2035	4.39979	0.461499	41.2	18.1	19	128	0.431204	2.64215	6.73684	0.952632	36.0546	2.16842
Ecca	mudstone	Andersson et al. (2004)	57.9	18.95	4.68	0.78	27.0714	10.0289	3.8851	0.467492	43.5	20.2	18	120	0.387392	2.69935	6.66667	1.12222	38.9577	2.41667
Ecca	mudstone	Andersson et al. (2004)	59.43	18.48	4.84	0.79	27.7867	9.78012	4.01792	0.473486	43.8	17.7	17	126	0.410825	2.84115	7.41176	1.04118	37.5782	2.57647
Ecca	mudstone	Andersson et al. (2004)	57.65	18.9	5.14	0.68	26.9545	10.0024	4.26696	0.407557	38.7	21.3	18	116	0.426594	2.6948	6.44444	1.18333	35.1342	2.15
Ecca	mudstone	Andersson et al. (2004)	58.48	18.16	5.02	0.72	27.3426	9.61077	4.16735	0.431531	39.5	16.8	17	116	0.433612	2.84499	6.82353	0.988235	37.201	2.32353
Ecca	mudstone	Andersson et al. (2004)	57.45	19.41	5.5	0.59	26.861	10.2723	4.56582	0.353616	39.6	21.9	17	140	0.444479	2.61489	8.23529	1.28824	25.2583	2.32941
Ecca	mudstone	Andersson et al. (2004)	59.68	17.64	4.55	0.61	27.9036	9.33557	3.77718	0.365603	34.2	19.9	16	108	0.404601	2.98896	6.75	1.24375	33.8521	2.1375
Ecca	mudstone	Andersson et al. (2004)	59.15	18.31	4.71	0.62	27.6558	9.69015	3.91	0.371596	45.2	19.3	16	113	0.403503	2.85401	7.0625	1.20625	32.8846	2.825
Ecca	mudstone	Andersson et al. (2004)	59.33	18.26	4.35	0.67	27.74	9.66369	3.61115	0.401564	38.8	22.8	16	120	0.373682	2.87054	7.5	1.425	33.4636	2.425
Ecca	mudstone	Andersson et al. (2004)	58.37	18.64	4.82	0.67	27.2911	9.86479	4.00132	0.401564	42.8	20.9	16	126	0.405616	2.76652	7.875	1.30625	31.8701	2.675
Ecca	mudstone	Andersson et al. (2004)	57.96	19.51	5.23	0.75	27.0994	10.3252	4.34168	0.449512	44	19.5	18	139	0.420492	2.62459	7.72222	1.08333	32.339	2.44444
Ecca	mudstone	Andersson et al. (2004)	68.52	14.16	2.97	0.66	32.0368	7.49386	2.46554	0.39557	44.6	14.4	10	181	0.329008	4.27508	18.1	1.44	21.8547	4.46
Ecca	mudstone	Andersson et al. (2004)	68.86	14.03	2.86	0.65	32.1958	7.42506	2.37423	0.389577	36.9	14.9	10	222	0.319759	4.3361	22.2	1.49	17.5485	3.69
Ecca	mudstone	Andersson et al. (2004)	64.13	15.96	3.3	0.76	29.9842	8.44647	2.73949	0.455505	40.2	16.2	13	185	0.324336	3.54992	14.2308	1.24615	24.6219	3.09231
Ecca	mudstone	Andersson et al. (2004)	66.01	14.95	3.46	0.81	30.8632	7.91195	2.87231	0.485473	47	22.1	13	245	0.363035	3.90084	18.8462	1.7	19.8152	3.61538
Ecca	mudstone	Andersson et al. (2004)	67.02	14.45	3.18	0.73	31.3355	7.64733	2.63987	0.437525	43.7	17.1	11	197	0.345202	4.09757	17.9091	1.55455	22.2094	3.97273
Ecca	mudstone	Andersson et al. (2004)	64.21	16.06	3.64	0.8	30.0216	8.49939	3.02174	0.479479	47.1	15.8	13	170	0.355525	3.53221	13.0769	1.21538	28.2047	3.62308
Ecca	mudstone	Andersson et al. (2004)	60.25	18.51	4.43	0.97	28.1701	9.79599	3.67756	0.581368	52.5	21.9	17	191	0.375415	2.87568	11.2353	1.28824	30.4381	3.08824
Ecca	mudstone	Andersson et al. (2004)	63.54	17.02	3.9	0.88	29.7084	9.00745	3.23758	0.527427	51.7	19	14	186	0.359434	3.2982	13.2857	1.35714	28.3563	3.69286
Ecca	mudstone	Andersson et al. (2004)	58.77	18.89	4.52	0.93	27.4782	9.9971	3.75227	0.557395	48.2	22.4	17	188	0.375336	2.74861	11.0588	1.31765	29.6486	2.83529
Ecca	mudstone	Andersson et al. (2004)	66.26	15	3.14	0.72	30.9801	7.93841	2.60667	0.431531	46.2	15.4	11	189	0.328361	3.90256	17.1818	1.4	22.8323	4.2
Ecca	mudstone	Andersson et al. (2004)	62.69	17.03	3.87	0.84	29.311	9.01274	3.21268	0.503453	43.6	16.8	15	174	0.356459	3.25217	11.6	1.12	28.9341	2.90667
Ecca	mudstone	Andersson et al. (2004)	58.89	18.49	4.2	0.98	27.5343	9.78541	3.48662	0.587362	59.7	21.8	17	228	0.356308	2.81381	13.4118	1.28235	25.7615	3.51176
Ecca	mudstone	Andersson et al. (2004)	61.16	17.68	4.13	0.92	28.5956	9.35674	3.42851	0.551401	52	21.3	15	221	0.366422	3.05615	14.7333	1.42	24.9503	3.46667
Ecca	mudstone	Andersson et al. (2004)	65.22	15.51	3.33	0.78	30.4939	8.20831	2.76439	0.467492	45.7	15.7	12	192	0.33678	3.715	16	1.30833	24.3486	3.80833
Ecca	mudstone	Andersson et al. (2004)	63.64	16.16	3.72	0.86	29.7551	8.55231	3.08815	0.51544	52.4	20	14	206	0.36109	3.47919	14.7143	1.42857	25.0214	3.74286
Ecca	mudstone	Andersson et al. (2004)	62.08	17.22	4.06	0.92	29.0258	9.11329	3.3704	0.551401	51.8	18.7	15	198	0.369834	3.18499	13.2	1.24667	27.8485	3.45333
Ecca	mudstone	Andersson et al. (2004)	60.28	18.24	4.31	0.95	28.1842	9.6531	3.57794	0.569381	48.7	22.9	17	189	0.370652	2.9197	11.1176	1.34706	30.126	2.86471
Ecca	mudstone	Andersson et al. (2004)	61.4	17.29	3.98	0.91	28.7078	9.15034	3.30399	0.545408	54.3	21.1	15	204	0.361079	3.13735	13.6	1.40667	26.7357	3.62
Ecca	mudstone	Andersson et al. (2004)	65.34	15.33	3.24	0.78	30.55	8.11305	2.68968	0.467492	46.3	16.7	12	214	0.331525	3.76554	17.8333	1.39167	21.8454	3.85833
Ecca	mudstone	Andersson et al. (2004)	60.01	18.25	4.23	0.95	28.0579	9.6584	3.51153	0.569381	51.3	19.1	17	208	0.363573	2.90503	12.2353	1.12353	27.3741	3.01765
Ecca	mudstone	Andersson et al. (2004)	59.66	18.31	4.43	0.91	27.8943	9.69015	3.67756	0.545408	47.8	24.4	17	186	0.379515	2.87862	10.9412	1.43529	29.323	2.81176
Ecca	mudstone	Andersson et al. (2004)	55.33	20.62	5.01	1.11	25.8698	10.9127	4.15904	0.665277	56.2	27.2	21	212	0.381121	2.37062	10.0952	1.29524	31.381	2.67619
Ecca	mudstone	Andersson et al. (2004)	65.06	15.51	3.28	0.77	30.4191	8.20831	2.72289	0.461499	44.3	17.6	12	214	0.331723	3.70589	17.8333	1.46667	21.5654	3.69167
Ecca	mudstone	Andersson et al. (2004)	61.63	17.17	4.21	0.86	28.8154	9.08683	3.49493	0.51544	48.9	21.1	15	182	0.384614	3.17111	12.1333	1.40667	28.3209	3.26
Ecca	mudstone	Andersson et al. (2004)	59.48	18.22	4.23	0.94	27.8101	9.64252	3.51153	0.563388	56.5	19.7	17	218	0.364171	2.88411	12.8235	1.15882	25.8435	3.32353
Ecca	mudstone	Andersson et al. (2004)	65.1	15.36	3.27	0.76	30.4378	8.12893	2.71459	0.455505	48.8	14.6	13	206	0.333941	3.74438	15.8462	1.12308	22.1119	3.75385
Ecca	mudstone	Andersson et al. (2004)	62.08	17.3	3.93	0.95	29.0258	9.15563	3.26248	0.569381	57.9	20.4	17	212	0.356336	3.17026	12.4706	1.2	26.8576	3.40588
Ecca	mudstone	Andersson et al. (2004)	64.17	16.13	3.72	0.8	30.0029	8.53643	3.08815	0.479479	47.7	17.5	15	167	0.361761	3.51469	11.1333	1.16667	28.7113	3.18
Ecca	mudstone	Andersson et al. (2004)	61.16	18	4.3	0.84	28.5956	9.52609	3.56964	0.503453	47.8	18.7	17	170	0.374722	3.00182	10	1.1	29.6149	2.81176
Ecca	mudstone	Andersson et al. (2004)	59.91	19.5	4.85	0.75	28.0112	10.3199	4.02622	0.449512	39.9	21.1	19	168	0.39014	2.71428	8.84211	1.11053	26.7566	2.1
Ecca	mudstone	Andersson et al. (2004)	65.13	15.61	3.6	0.8	30.4518	8.26124	2.98854	0.479479	45.3	17.9	14	199	0.361754	3.68611	14.2143	1.27857	24.0944	3.23571
Ecca	mudstone	Andersson et al. (2004)	64.53	16.18	3.85	0.89	30.1713	8.5629	3.19607	0.533421	55.2	23.1	16	291	0.373247	3.52349	18.1875	1.44375	18.3306	3.45
Ecca	mudstone	Andersson et al. (2004)	67.88	14.18	3.1	0.75	31.7376	7.50444	2.57346	0.449512	45.8	18.1	12	204	0.342925	4.22917	17	1.50833	22.0349	3.81667
Ecca	mudstone	Andersson et al. (2004)	58.21	19.49	4.74	0.71	27.2163	10.3146	3.9349	0.425538	40.2	22.1	18	153	0.381487	2.63861	8.5	1.22778	27.8129	2.23333
Ecca	mudstone	Andersson et al. (2004)	57.01	20.36	4.85	0.64	26.6553	10.7751	4.02622	0.383583	57.9	29.7	16	144	0.373661	2.47379	9	1.85625	26.6377	3.61875
Ecca	mudstone	Andersson et al. (2004)	65.37	15.4	3.52	0.65	30.564	8.1501	2.92212	0.389577	44.8	16.4	13	170	0.358538	3.75014	13.0769	1.26154	22.9163	3.44615
Ecca	mudstone	Andersson et al. (2004)	64.82	15.91	3.75	0.78	30.3069	8.42	3.11306	0.467492	43.5	16.7	13	178	0.369722	3.59939	13.6923	1.28462	26.2636	3.34615
Ecca	mudstone	Andersson et al. (2004)	62.69	16.91	4.09	0.73	29.311	8.94923	3.39531	0.437525	43.4	16	14	153	0.379397	3.27525	10.9286	1.14286	28.5964	3.1
Ecca	mudstone	Andersson et al. (2004)	59.71	18.98	4.96	0.74	27.9177	10.0447	4.11754	0.443518	33.6	17.8	17	131	0.40992	2.77933	7.70588	1.04706	33.8564	1.97647
Ecca	mudstone	Andersson et al. (2004)	60.43	18.05	4.35	0.7	28.2543	9.55255	3.61115	0.419544	42.8	17.6	15	132	0.37803	2.95777	8.8	1.17333	31.7837	2.85333
Ecca	mudstone	Andersson et al. (2004)	59.28	17.41	4.34	0.65	27.7166	9.21384	3.60285	0.389577	45.5	18.2	14	105	0.391025	3.00815	7.5	1.3	37.1026	3.25
Ecca	mudstone	Andersson et al. (2004)	59.65	17.58	4.51	0.65	27.8896	9.30381	3.74397	0.389577	53.6	16.8	15	119	0.402412	2.99765	7.93333	1.12	32.7375	3.57333
Ecca	mudstone	Andersson et al. (2004)	66.08	15.16	3.4	0.67	30.896	8.02308	2.82251	0.401564	42.9	14.6	10	161	0.351798	3.85089	16.1	1.46	24.9419	4.29
Ecca	mudstone	Andersson et al. (2004)	68	14.25	3.27	0.65	31.7937	7.54149	2.71459	0.389577	41.6	15.3	10	189	0.359954	4.21584	18.9	1.53	20.6125	4.16
Ecca	mudstone	Andersson et al. (2004)	29.63	14.23	4.22	0.26	13.8536	7.5309	3.50323	0.155831	47.6	43.4	5	162	0.46518	1.83957	32.4	8.68	9.61918	9.52
Ecca	mudstone	Andersson et al. (2004)	54.13	22.08	5.64	0.77	25.3087	11.6853	4.68204	0.461499	43.2	22.6	20	162	0.400676	2.16585	8.1	1.13	28.4876	2.16
Ecca	mudstone	Andersson et al. (2004)	58.79	19.02	4.69	0.89	27.4875	10.0659	3.8934	0.533421	50.3	20.9	15	201	0.386791	2.73075	13.4	1.39333	26.5383	3.35333
Ecca	mudstone	Andersson et al. (2004)	50.36	24.66	6.53	0.91	23.546	13.0507	5.42087	0.545408	42.7	23	22	166	0.415369	1.80419	7.54545	1.04545	32.8559	1.94091
Ecca	mudstone	Andersson et al. (2004)	54.99	21.53	5.51	0.96	25.7108	11.3943	4.57412	0.575375	49.2	21.4	20	187	0.401441	2.25647	9.35	1.07	30.7687	2.46
Ecca	mudstone	Andersson et al. (2004)	61.07	17.54	4.32	0.93	28.5535	9.28264	3.58624	0.557395	53.3	20.4	14	247	0.386338	3.07601	17.6429	1.45714	22.5666	3.80714
Ecca	mudstone	Andersson et al. (2004)	62.74	16.12	3.87	0.89	29.3343	8.53114	3.21268	0.533421	52.4	19.9	13	261	0.376582	3.4385	20.0769	1.53077	20.4376	4.03077
Ecca	mudstone	Andersson et al. (2004)	64.44	14.97	3.28	0.74	30.1292	7.92253	2.72289	0.443518	47.2	17.1	14	303	0.343689	3.80297	21.6429	1.22143	14.6376	3.37143
Ecca	mudstone	Andersson et al. (2004)	54.52	21.76	5.33	0.86	25.491	11.516	4.42469	0.51544	41.9	20	21	145	0.384222	2.21354	6.90476	0.952381	35.5476	1.99524
Ecca	mudstone	Andersson et al. (2004)	56.52	19.7	4.85	0.74	26.4262	10.4258	4.02622	0.443518	42.6	19.8	18	119	0.38618	2.53469	6.61111	1.1	37.2704	2.36667
Ecca	mudstone	Andersson et al. (2004)	60.68	17.45	4.24	0.78	28.3712	9.23501	3.51983	0.467492	40.6	17.3	16	119	0.38114	3.07213	7.4375	1.08125	39.2851	2.5375
Ecca	mudstone	Andersson et al. (2004)	59.47	18.43	4.64	0.8	27.8054	9.75366	3.85189	0.479479	43.2	19.8	16	132	0.394918	2.85077	8.25	1.2375	36.3242	2.7
Ecca	mudstone	Andersson et al. (2004)	58.31	19.71	5.04	0.84	27.2631	10.4311	4.18395	0.503453	49.1	20.5	18	142	0.401105	2.61364	7.88889	1.13889	35.4544	2.72778
Ecca	mudstone	Andersson et al. (2004)	56.61	20.55	5.27	0.7	26.4682	10.8756	4.37488	0.419544	53.2	21.4	19	141	0.402265	2.43372	7.42105	1.12632	29.7549	2.8
Ecca	mudstone	Andersson et al. (2004)	60.11	17.75	4.19	0.77	28.1047	9.39378	3.47832	0.461499	37.7	-	16	130	0.370279	2.99184	8.125	-	35.4999	2.35625

## Sheet: Cape Supergroup
Group	Rock type	Reference	SiO2 [%]	Al2O3 [%]	K2O [%]	TiO2 [%]	Si [%]	Al [%]	K [%]	Ti [%]	La [ppm]	Th [ppm]	Sc [ppm]	Zr [ppm]	K/Al	Si/Al	Zr/Sc	Th/Sc	Ti/Zr [*10-4]	La/Sc
Bokkeveld	Silt	Fourie et al. (2011)	67.8	-	-	1.02	31.7002	-	-	0.611336	64	29.2	11.8	871	-	-	73.8136	2.47458	7.01878	5.42373
Witteberg	Shale-silt	Fourie et al. (2011)	71.2	-	-	0.8	33.2899	-	-	0.479479	42	13.4	9.9	363	-	-	36.6667	1.35354	13.2088	4.24242
Witteberg (East)	Shale-silt	Fourie et al. (2011)	69.7	-	-	0.53	32.5885	-	-	0.317655	31	26	5.9	354	-	-	60	4.40678	8.9733	5.25424
Witteberg (East)	Shale-silt	Fourie et al. (2011)	68.8	-	-	0.67	32.1677	-	-	0.401564	58	18.7	11	271	-	-	24.6364	1.7	14.8179	5.27273
Witteberg (East)	Shale-sand	Fourie et al. (2011)	69.1	-	-	0.76	32.308	-	-	0.455505	24	11.9	7.9	211	-	-	26.7089	1.50633	21.5879	3.03797
Witteberg	Shale	Fourie et al. (2011)	67.1	-	-	0.85	31.3729	-	-	0.509447	52	16.2	16	351	-	-	21.9375	1.0125	14.5141	3.25
Bokkeveld	Shale	Fourie et al. (2011)	66.1	-	-	0.91	30.9053	-	-	0.545408	62	20.8	16.2	353	-	-	21.7901	1.28395	15.4506	3.82716
Bokkeveld	Shale	Fourie et al. (2011)	66	-	-	0.83	30.8586	-	-	0.49746	41	15.2	15.4	259	-	-	16.8182	0.987013	19.2069	2.66234
Bokkeveld	Shale	Fourie et al. (2011)	64.7	-	-	0.75	30.2507	-	-	0.449512	33	13.1	17.4	127	-	-	7.29885	0.752874	35.3946	1.89655
Table Mountain	Shale	Fourie et al. (2011)	62.2	-	-	1.14	29.0819	-	-	0.683258	52	21.8	23.3	225	-	-	9.65665	0.935622	30.367	2.23176
Bokkeveld (East)	Shale	Fourie et al. (2011)	61.6	-	-	1	28.8013	-	-	0.599349	49	16.8	17.3	211	-	-	12.1965	0.971098	28.4052	2.83237
Bokkeveld (East)	Shale	Fourie et al. (2011)	60.6	-	-	1	28.3338	-	-	0.599349	49	13.9	18.9	177	-	-	9.36508	0.73545	33.8615	2.59259
Bokkeveld (East)	Shale	Fourie et al. (2011)	60.1	-	-	1	28.1	-	-	0.599349	41	14.4	19.7	171	-	-	8.6802	0.730964	35.0496	2.08122
Bokkeveld	Shale	Fourie et al. (2011)	59	-	-	0.92	27.5857	-	-	0.551401	41	18.4	20.3	162	-	-	7.9803	0.906404	34.0371	2.0197
Bokkeveld	Shale	Fourie et al. (2011)	58.93	-	-	1.06	27.553	-	-	0.63531	52	20.3	21	248	-	-	11.8095	0.966667	25.6173	2.47619
Bokkeveld (East)	Shale	Fourie et al. (2011)	56.4	-	-	0.9	26.37	-	-	0.539414	32	13.1	15.4	180	-	-	11.6883	0.850649	29.9674	2.07792
Table Mountain	Til-shale	Fourie et al. (2011)	65	-	-	0.54	30.391	-	-	0.323648	41	13.2	10.2	229	-	-	22.451	1.29412	14.1331	4.01961

## Sheet: Karoo volcanics
Group	Rock type	Reference	SiO2 [%]	Al2O3 [%]	K2O [%]	TiO2 [%]	Si [%]	Al [%]	K [%]	Ti [%]	La [ppm]	Th [ppm]	Sc [ppm]	Zr [ppm]	K/Al	Si/Al	Zr/Sc	Th/Sc	Ti/Zr [*10-4]	La/Sc
Golden Valley Sill Complex	dolerite	Galerne et al. (2008)	50.764	15.47	0.37	0.91	23.7349	8.18714	0.307155	0.545408	7.78	0	35	80	0.0375167	2.89905	2.28571	0	68.1759	0.222286
Golden Valley Sill Complex	dolerite	Galerne et al. (2008)	50.2054	15.25	0.43	0.91	23.4737	8.07071	0.356964	0.545408	7.28	0	33	81	0.0442295	2.90851	2.45455	0	67.3343	0.220606
Golden Valley Sill Complex	dolerite	Galerne et al. (2008)	50.2936	15.41	0.41	0.93	23.515	8.15539	0.340361	0.557395	7.36	0	35	81	0.0417345	2.88337	2.31429	0	68.8141	0.210286
Golden Valley Sill Complex	dolerite	Galerne et al. (2008)	50.8718	15.6	0.41	0.93	23.7853	8.25594	0.340361	0.557395	7.98	0	34	81	0.0412262	2.88099	2.38235	0	68.8141	0.234706
Golden Valley Sill Complex	dolerite	Galerne et al. (2008)	50.47	15.33	0.4	0.88	23.5975	8.11305	0.332059	0.527427	7.87	0	33	79	0.040929	2.90858	2.39394	0	66.7629	0.238485
Golden Valley Sill Complex	dolerite	Galerne et al. (2008)	50.47	15.44	0.46	0.93	23.5975	8.17127	0.381868	0.557395	7.28	0	34	79	0.0467331	2.88786	2.32353	0	70.5563	0.214118
Golden Valley Sill Complex	dolerite	Galerne et al. (2008)	50.6758	15.18	0.44	0.92	23.6937	8.03367	0.365265	0.551401	6.68	0	33	77	0.0454668	2.9493	2.33333	0	71.6105	0.202424
Golden Valley Sill Complex	dolerite	Galerne et al. (2008)	50.2054	15.24	0.36	0.92	23.4738	8.06542	0.298854	0.551401	6.99	0	34	71.965	0.0370537	2.91042	2.11662	0	76.6207	0.205588
Golden Valley Sill Complex	dolerite	Galerne et al. (2008)	49.9494	15.11	0.36	0.88	23.354	7.99662	0.298854	0.527427	6.72	0	33	68.95	0.0373725	2.92049	2.08939	0	76.4941	0.203636
Golden Valley Sill Complex	dolerite	Galerne et al. (2008)	50.3631	15.38	0.4	0.98	23.5474	8.13951	0.332059	0.587362	6.85	0	34	71.205	0.040796	2.89298	2.09426	0	82.4889	0.201471
Golden Valley Sill Complex	dolerite	Galerne et al. (2008)	50.7275	15.69	0.41	1.03	23.7178	8.30357	0.340361	0.617329	7.51	1.32	34	74.59	0.0409897	2.85634	2.19382	0.0388235	82.763	0.220882
Golden Valley Sill Complex	dolerite	Galerne et al. (2008)	50.166	15.89	0.37	0.87	23.4553	8.40942	0.307155	0.521434	6.68	0	33	64.83	0.0365251	2.78917	1.96455	0	80.4309	0.202424
Golden Valley Sill Complex	dolerite	Galerne et al. (2008)	50.6388	15.46	0.36	1	23.6764	8.18185	0.298854	0.599349	7.18	1.88	35	74.2	0.0365264	2.89377	2.12	0.0537143	80.7748	0.205143
Golden Valley Sill Complex	dolerite	Galerne et al. (2008)	48.925	14.82	0.41	0.91	22.8751	7.84315	0.340361	0.545408	6.88	0	35	70.47	0.043396	2.91657	2.01343	0	77.3957	0.196571
Golden Valley Sill Complex	dolerite	Galerne et al. (2008)	50.4123	15.26	0.42	1	23.5705	8.07601	0.348662	0.599349	7.73	0	36	74.805	0.0431726	2.91858	2.07792	0	80.1215	0.214722
Golden Valley Sill Complex	dolerite	Galerne et al. (2008)	49.8016	14.94	0.37	0.85	23.2849	7.90665	0.307155	0.509447	7.28	0	32	80.115	0.0388477	2.94498	2.50359	0	63.5894	0.2275
Golden Valley Sill Complex	dolerite	Galerne et al. (2008)	49.7425	15.26	0.28	0.73	23.2573	8.07601	0.232442	0.437525	5.22	0	35	56.015	0.0287818	2.8798	1.60043	0	78.1085	0.149143
Golden Valley Sill Complex	dolerite	Galerne et al. (2008)	50.3926	15.33	0.33	0.9	23.5613	8.11305	0.273949	0.539414	7.17	0	34	72.385	0.0337665	2.90412	2.12897	0	74.5201	0.210882
Golden Valley Sill Complex	dolerite	Galerne et al. (2008)	50.629	15.73	0.42	0.93	23.6718	8.32474	0.348662	0.557395	6.82	0	34	69.43	0.0418827	2.84355	2.04206	0	80.2815	0.200588
Golden Valley Sill Complex	dolerite	Galerne et al. (2008)	50.4615	15.42	0.41	0.93	23.5935	8.16068	0.340361	0.557395	6.86	1.11	36	74.47	0.0417074	2.89112	2.06861	0.0308333	74.8482	0.190556
Golden Valley Sill Complex	dolerite	Galerne et al. (2008)	50.5699	15.43	0.39	0.93	23.6442	8.16597	0.323758	0.557395	6.86	0	34	69.79	0.0396472	2.89545	2.05265	0	79.8674	0.201765
Golden Valley Sill Complex	dolerite	Galerne et al. (2008)	50.9048	15.21	0.38	1.01	23.8007	8.04954	0.315456	0.605342	6.7	0	36	71.175	0.0391894	2.95678	1.97708	0	85.0499	0.186111
Golden Valley Sill Complex	dolerite	Galerne et al. (2008)	50.7472	15.84	0.37	0.9	23.7271	8.38296	0.307155	0.539414	6.96	0	32	69.02	0.0366404	2.83039	2.15687	0	78.1533	0.2175
Golden Valley Sill Complex	dolerite	Galerne et al. (2008)	50.2744	15.53	0.41	0.97	23.506	8.2189	0.340361	0.581368	7.82	0	34	74.065	0.041412	2.85999	2.17838	0	78.4944	0.23
Golden Valley Sill Complex	dolerite	Galerne et al. (2008)	49.9506	15.46	0.42	0.93	23.3546	8.18185	0.348662	0.557395	7.79	0	35	75	0.0426141	2.85444	2.14286	0	74.3193	0.222571
Golden Valley Sill Complex	dolerite	Galerne et al. (2008)	50.7836	15.95	0.43	0.9	23.7441	8.44117	0.356964	0.539414	7.63	0	34	75	0.0422884	2.81289	2.20588	0	71.9219	0.224412
Golden Valley Sill Complex	dolerite	Galerne et al. (2008)	50.274	16.4	0.28	0.7	23.5058	8.67933	0.232442	0.419544	5.3	0	33	50	0.0267811	2.70825	1.51515	0	83.9089	0.160606
Golden Valley Sill Complex	dolerite	Galerne et al. (2008)	50.764	16.12	0.36	0.82	23.7349	8.53114	0.298854	0.491466	6.83	0	35	67	0.0350309	2.78215	1.91429	0	73.3532	0.195143
Golden Valley Sill Complex	dolerite	Galerne et al. (2008)	49.9898	15.74	0.32	0.7	23.3729	8.33004	0.265648	0.419544	6.26	0	37	58	0.0318903	2.80586	1.56757	0	72.3352	0.169189
Golden Valley Sill Complex	dolerite	Galerne et al. (2008)	50.2642	15.29	0.43	0.95	23.5012	8.09188	0.356964	0.569381	7.87	0	34	80	0.0441138	2.9043	2.35294	0	71.1727	0.231471
Golden Valley Sill Complex	dolerite	Galerne et al. (2008)	50.4406	15.4	0.44	0.97	23.5837	8.1501	0.365265	0.581368	6.93	0	34	78	0.0448173	2.89367	2.29412	0	74.5344	0.203824
Golden Valley Sill Complex	dolerite	Galerne et al. (2008)	50.7542	15.58	0.42	0.94	23.7303	8.24536	0.348662	0.563388	7.8	0	35	78	0.0422859	2.87802	2.22857	0	72.2292	0.222857
Golden Valley Sill Complex	dolerite	Galerne et al. (2008)	50.8718	15.67	0.34	0.95	23.7853	8.29299	0.282251	0.569381	7.87	1	36	81	0.0340348	2.86812	2.25	0.0277778	70.294	0.218611
Golden Valley Sill Complex	dolerite	Galerne et al. (2008)	51.3618	15.67	0.4	0.95	24.0144	8.29299	0.332059	0.569381	8.02	0	35	80	0.040041	2.89575	2.28571	0	71.1727	0.229143
Golden Valley Sill Complex	dolerite	Galerne et al. (2008)	50.4602	15.84	0.41	0.91	23.5929	8.38296	0.340361	0.545408	7.82	0	35	78	0.0406015	2.81439	2.22857	0	69.924	0.223429
Golden Valley Sill Complex	dolerite	Galerne et al. (2008)	51.4696	15.85	0.41	0.94	24.0648	8.38825	0.340361	0.563388	8.26	0	35	84	0.0405759	2.86887	2.4	0	67.07	0.236
Golden Valley Sill Complex	dolerite	Galerne et al. (2008)	50.9306	16.47	0.43	0.89	23.8128	8.71637	0.356964	0.533421	7.98	0	33	81	0.0409533	2.73196	2.45455	0	65.8544	0.241818
Golden Valley Sill Complex	dolerite	Galerne et al. (2008)	50.911	15.8	0.42	0.89	23.8036	8.36179	0.348662	0.533421	8.18	1.05	34	83	0.0416971	2.84672	2.44118	0.0308824	64.2675	0.240588
Golden Valley Sill Complex	dolerite	Galerne et al. (2008)	52.69	15.17	0.77	1.13	24.6354	8.02838	0.639214	0.677264	-	-	-	111	0.0796194	3.06854	-	-	61.0148	-
Golden Valley Sill Complex	dolerite	Galerne et al. (2008)	51.36	16.01	0.45	0.9	24.0136	8.47293	0.373567	0.539414	-	-	-	80	0.0440895	2.83415	-	-	67.4268	-
Golden Valley Sill Complex	dolerite	Galerne et al. (2008)	51.78	15.52	0.43	0.99	24.21	8.21361	0.356964	0.593355	-	-	-	79	0.0434601	2.94754	-	-	75.1083	-
Golden Valley Sill Complex	dolerite	Galerne et al. (2008)	51.41	15.85	0.37	0.78	24.037	8.38825	0.307155	0.467492	-	-	-	53	0.0366173	2.86555	-	-	88.2061	-
Golden Valley Sill Complex	dolerite	Galerne et al. (2008)	52.94	14.05	0.61	1.19	24.7523	7.43564	0.506391	0.713225	-	-	-	92	0.0681032	3.32887	-	-	77.5245	-
Golden Valley Sill Complex	dolerite	Galerne et al. (2008)	51.59	15.59	0.49	0.99	24.1211	8.25065	0.406773	0.593355	-	-	-	78	0.0493019	2.92354	-	-	76.0712	-
Golden Valley Sill Complex	dolerite	Galerne et al. (2008)	51.52	15.86	0.4	0.85	24.0884	8.39354	0.332059	0.509447	-	-	-	67	0.0395613	2.86987	-	-	76.0368	-
Golden Valley Sill Complex	dolerite	Galerne et al. (2008)	52.92	13.86	0.67	1.39	24.743	7.33509	0.5562	0.833095	-	-	-	120	0.0758273	3.37323	-	-	69.4246	-
Golden Valley Sill Complex	dolerite	Galerne et al. (2008)	51.63	15.89	0.42	0.94	24.1398	8.40942	0.348662	0.563388	-	-	-	79	0.0414609	2.87057	-	-	71.3149	-
Golden Valley Sill Complex	dolerite	Galerne et al. (2008)	52.4202	15.06	0.91	1.2	24.5093	7.97016	0.755435	0.719219	12.02	2.06	29	111	0.0947829	3.07513	3.82759	0.0710345	64.7945	0.414483
Golden Valley Sill Complex	dolerite	Galerne et al. (2008)	52.6358	15.58	0.86	1.14	24.6101	8.24536	0.713928	0.683258	13.03	1.96	27	104	0.0865854	2.98472	3.85185	0.0725926	65.6979	0.482593
Golden Valley Sill Complex	dolerite	Galerne et al. (2008)	53.0376	14.33	1.12	1.37	24.7979	7.58383	0.929766	0.821108	15.96	2.37	31	124	0.122599	3.26985	4	0.0764516	66.2184	0.514839
Golden Valley Sill Complex	dolerite	Galerne et al. (2008)	53.5962	12.95	1.71	1.87	25.0591	6.85349	1.41955	1.12078	21.27	3.39	32	162	0.207129	3.6564	5.0625	0.105938	69.1841	0.664687
Golden Valley Sill Complex	dolerite	Galerne et al. (2008)	54.6809	13.33	1.49	1.76	25.5663	7.0546	1.23692	1.05485	18.43	3.47	35	160.715	0.175335	3.62406	4.59186	0.0991429	65.6351	0.526571
Golden Valley Sill Complex	dolerite	Galerne et al. (2008)	53.7334	12.84	1.5	1.96	25.1233	6.79528	1.24522	1.17472	20.78	3.44	33	176	0.183248	3.69717	5.33333	0.104242	66.7457	0.629697
Golden Valley Sill Complex	dolerite	Galerne et al. (2008)	51.7342	15.28	0.88	1.15	24.1885	8.08659	0.730531	0.689251	11.4	1.77	28	103	0.0903385	2.99119	3.67857	0.0632143	66.9176	0.407143
Golden Valley Sill Complex	dolerite	Galerne et al. (2008)	51.5088	15.8	0.79	0.88	24.0831	8.36179	0.655817	0.527427	8.89	1.45	25	85	0.0784303	2.88014	3.4	0.058	62.0502	0.3556
Golden Valley Sill Complex	dolerite	Galerne et al. (2008)	53.0721	15.19	0.82	1.26	24.8141	8.03896	0.680722	0.75518	12.3	1.91	30	109.705	0.0846778	3.08673	3.65683	0.0636667	68.8373	0.41
Golden Valley Sill Complex	dolerite	Galerne et al. (2008)	52.9592	15.64	0.91	1.14	24.7613	8.27711	0.755435	0.683258	13.89	2.02	27	106	0.091268	2.99154	3.92593	0.0748148	64.4583	0.514444
Golden Valley Sill Complex	dolerite	Galerne et al. (2008)	51.009	15.47	0.69	0.99	23.8495	8.18714	0.572803	0.593355	10.8575	1.63	37	91	0.0699637	2.91304	2.45946	0.0440541	65.2039	0.293446
Golden Valley Sill Complex	dolerite	Galerne et al. (2008)	51.1364	14.93	0.76	1.05	23.909	7.90136	0.630913	0.629316	11.162	1.48	37	103	0.0798486	3.02594	2.78378	0.04	61.0987	0.301676
Golden Valley Sill Complex	dolerite	Galerne et al. (2008)	51.107	14.91	0.71	1.06	23.8953	7.89078	0.589406	0.63531	11.8235	1.46	37	105	0.0746955	3.02826	2.83784	0.0394595	60.5057	0.319554
Golden Valley Sill Complex	dolerite	Galerne et al. (2008)	50.8747	15.49	0.66	0.97	23.7867	8.19773	0.547898	0.581368	11.38	1.29	37	94.595	0.0668354	2.90162	2.55662	0.0348649	61.4587	0.307568
Golden Valley Sill Complex	dolerite	Galerne et al. (2008)	50.7934	15.22	0.7	1.05	23.7487	8.05484	0.581104	0.629316	11.9075	1.33	38	100	0.0721435	2.94837	2.63158	0.035	62.9316	0.313355
Golden Valley Sill Complex	dolerite	Galerne et al. (2008)	51.4206	15.1	0.75	1.09	24.0419	7.99133	0.622611	0.65329	11.4455	1.43	38	107	0.0779109	3.0085	2.81579	0.0376316	61.0552	0.301197
Golden Valley Sill Complex	dolerite	Galerne et al. (2008)	51.0482	15	0.75	1.11	23.8678	7.93841	0.622611	0.665277	11.96	1.42	38	107	0.0784303	3.00662	2.81579	0.0373684	62.1755	0.314737
Golden Valley Sill Complex	dolerite	Galerne et al. (2008)	49.8918	14.3	0.68	1.03	23.3271	7.56795	0.564501	0.617329	10.8785	1.38	38	104	0.074591	3.08236	2.73684	0.0363158	59.3586	0.286276
Golden Valley Sill Complex	dolerite	Galerne et al. (2008)	51.3259	15.16	0.62	1.02	23.9976	8.02308	0.514692	0.611336	11.06	1.42	38	96.74	0.0641514	2.99107	2.54579	0.0373684	63.1937	0.291053
Golden Valley Sill Complex	dolerite	Galerne et al. (2008)	48.0298	14.01	0.66	1.05	22.4565	7.41447	0.547898	0.629316	11.31	1.24	38	94.855	0.0738958	3.02874	2.49618	0.0326316	66.3451	0.297632
Golden Valley Sill Complex	dolerite	Galerne et al. (2008)	51.0972	14.72	0.68	1.05	23.8907	7.79022	0.564501	0.629316	11.267	1.4	40	96	0.0724628	3.06675	2.4	0.035	65.5538	0.281675
Golden Valley Sill Complex	dolerite	Galerne et al. (2008)	51.1756	15.05	0.71	1.06	23.9274	7.96487	0.589406	0.63531	10.763	1.59	39	107	0.0740007	3.00411	2.74359	0.0407692	59.3748	0.275974
Golden Valley Sill Complex	dolerite	Galerne et al. (2008)	51.2474	15.23	0.68	1	23.9609	8.06013	0.564501	0.599349	10.75	1.38	36	101.995	0.0700362	2.97277	2.83319	0.0383333	58.7626	0.298611
Golden Valley Sill Complex	dolerite	Galerne et al. (2008)	50.1172	14.55	0.75	1.06	23.4325	7.70026	0.622611	0.63531	10.49	1.31	38	105	0.080856	3.04308	2.76316	0.0344737	60.5057	0.276053
Golden Valley Sill Complex	dolerite	Galerne et al. (2008)	49.9408	14.99	0.64	0.95	23.35	7.93311	0.531295	0.569381	10.385	1.3	38	96	0.0669718	2.94336	2.52632	0.0342105	59.3106	0.273289
Golden Valley Sill Complex	dolerite	Galerne et al. (2008)	51.0874	15.13	0.7	0.99	23.8861	8.00721	0.581104	0.593355	9.944	1.29	39	98	0.0725726	2.98308	2.51282	0.0330769	60.5465	0.254974
Golden Valley Sill Complex	dolerite	Galerne et al. (2008)	49.882	14.6	0.74	1.06	23.3225	7.72672	0.61431	0.63531	10.595	1.64	39	103	0.0795047	3.01843	2.64103	0.0420513	61.6806	0.271667
Golden Valley Sill Complex	dolerite	Galerne et al. (2008)	52.1066	15.86	0.51	0.72	24.3627	8.39354	0.423376	0.431531	9.35	1.29	39	79	0.0504407	2.90255	2.02564	0.0330769	54.6242	0.239744
Golden Valley Sill Complex	dolerite	Galerne et al. (2008)	51.9596	15.19	0.59	0.92	24.2939	8.03896	0.489788	0.551401	10.2	1.38	41	88	0.0609267	3.02202	2.14634	0.0336585	62.6592	0.24878
Golden Valley Sill Complex	dolerite	Galerne et al. (2008)	52.2928	14.17	0.86	1.3	24.4497	7.49915	0.713928	0.779154	14.71	2.17	43	133	0.0952012	3.26033	3.09302	0.0504651	58.583	0.342093
Golden Valley Sill Complex	dolerite	Galerne et al. (2008)	52.332	15.24	0.82	1.19	24.468	8.06542	0.680722	0.713225	14.44	1.87	40	117	0.0844	3.0337	2.925	0.04675	60.9594	0.361
Golden Valley Sill Complex	dolerite	Galerne et al. (2008)	51.303	15.45	0.72	1.07	23.9869	8.17656	0.597707	0.641303	12.32	1.79	38	111	0.0731001	2.93362	2.92105	0.0471053	57.7751	0.324211
Golden Valley Sill Complex	dolerite	Galerne et al. (2008)	51.4696	15.4	0.65	1.01	24.0648	8.1501	0.539597	0.605342	11.71	1.76	38	103	0.0662074	2.9527	2.71053	0.0463158	58.7711	0.308158
Golden Valley Sill Complex	dolerite	Galerne et al. (2008)	51.3814	15.21	0.65	0.96	24.0236	8.04954	0.539597	0.575375	11.67	1.63	38	104	0.0670344	2.98446	2.73684	0.0428947	55.3245	0.307105
Golden Valley Sill Complex	dolerite	Galerne et al. (2008)	51.7146	15.32	0.7	1.07	24.1794	8.10776	0.581104	0.641303	13	1.74	38	111	0.0716726	2.98225	2.92105	0.0457895	57.7751	0.342105
Golden Valley Sill Complex	dolerite	Galerne et al. (2008)	51.989	15.29	0.7	1.07	24.3077	8.09188	0.581104	0.641303	12.74	1.61	38	110	0.0718132	3.00396	2.89474	0.0423684	58.3003	0.335263
Golden Valley Sill Complex	dolerite	Galerne et al. (2008)	51.3481	15.02	0.69	1.08	24.008	7.94899	0.572803	0.647297	10.85	1.4	39	95.52	0.0720598	3.02026	2.44923	0.0358974	67.7656	0.278205
Golden Valley Sill Complex	dolerite	Galerne et al. (2008)	51.2692	15.59	0.65	1.04	23.9711	8.25065	0.539597	0.623323	10.34	1.31	38	91.64	0.0654005	2.90536	2.41158	0.0344737	68.0186	0.272105
Golden Valley Sill Complex	dolerite	Galerne et al. (2008)	51.0131	15.12	0.64	1.04	23.8514	8.00191	0.531295	0.623323	9.97	1.19	40	89.6	0.066396	2.98071	2.24	0.02975	69.5673	0.24925
Golden Valley Sill Complex	dolerite	Galerne et al. (2008)	51.7026	15.6	0.71	0.98	24.1738	8.25594	0.589406	0.587362	11.32	1.36	36	102.92	0.0713917	2.92805	2.85889	0.0377778	57.0698	0.314444
Golden Valley Sill Complex	dolerite	Galerne et al. (2008)	51.5746	15.69	0.63	0.89	24.1139	8.30357	0.522994	0.533421	10.54	1.57	35	92.845	0.0629842	2.90404	2.65271	0.0448571	57.4528	0.301143
Golden Valley Sill Complex	dolerite	Galerne et al. (2008)	51.6238	14.85	0.55	0.99	24.1369	7.85902	0.456582	0.593355	9.6	1.1	39	83.43	0.0580965	3.07124	2.13923	0.0282051	71.1202	0.246154
Golden Valley Sill Complex	dolerite	Galerne et al. (2008)	51.6829	15.05	0.65	1.02	24.1646	7.96487	0.539597	0.611336	11.14	2.74	37	101.88	0.0677471	3.03389	2.75351	0.0740541	60.0055	0.301081
Golden Valley Sill Complex	dolerite	Galerne et al. (2008)	51.0821	15.2	0.62	0.95	23.8836	8.04425	0.514692	0.569381	10.43	2.42	36	92.915	0.0639826	2.96903	2.58097	0.0672222	61.2798	0.289722
Golden Valley Sill Complex	dolerite	Galerne et al. (2008)	51.3973	15.1	0.66	1.04	24.031	7.99133	0.547898	0.623323	11.14	1.17	37	97.295	0.0685616	3.00714	2.62959	0.0316216	64.0653	0.301081
Golden Valley Sill Complex	dolerite	Galerne et al. (2008)	51.1116	14.96	0.63	1.03	23.8975	7.91724	0.522994	0.617329	11.24	1.27	37	96.305	0.0660576	3.01841	2.60284	0.0343243	64.1015	0.303784
Golden Valley Sill Complex	dolerite	Galerne et al. (2008)	51.1904	14.94	0.69	1.05	23.9343	7.90665	0.572803	0.629316	10.99	1.42	38	96.58	0.0724456	3.02711	2.54158	0.0373684	65.1601	0.289211
Golden Valley Sill Complex	dolerite	Galerne et al. (2008)	51.2495	15.02	0.69	1.09	23.9619	7.94899	0.572803	0.65329	11.45	1.45	37	99.29	0.0720598	3.01446	2.68351	0.0391892	65.7962	0.309459
Golden Valley Sill Complex	dolerite	Galerne et al. (2008)	51.3382	15.5	0.65	0.91	24.0034	8.20302	0.539597	0.545408	10.19	2.51	35	92.14	0.0657802	2.92616	2.63257	0.0717143	59.1934	0.291143
Golden Valley Sill Complex	dolerite	Galerne et al. (2008)	51.1708	16.14	0.54	0.8	23.9251	8.54173	0.44828	0.479479	9.46	1.29	35	78.27	0.0524812	2.80097	2.23629	0.0368571	61.2596	0.270286
Golden Valley Sill Complex	dolerite	Galerne et al. (2008)	50.501	14.78	0.67	1.07	23.6119	7.82198	0.5562	0.641303	10.83	1.45	38	96.28	0.0711073	3.01866	2.53368	0.0381579	66.6082	0.285
Golden Valley Sill Complex	dolerite	Galerne et al. (2008)	51.2594	15.15	0.7	1.07	23.9665	8.01779	0.581104	0.641303	11.03	1.61	39	97.3	0.0724768	2.98917	2.49487	0.0412821	65.9099	0.282821
Golden Valley Sill Complex	dolerite	Galerne et al. (2008)	50.0281	14.7	0.7	1.08	23.3909	7.77964	0.581104	0.647297	11.37	1.67	39	92.495	0.0746955	3.00668	2.37167	0.0428205	69.9818	0.291538
Golden Valley Sill Complex	dolerite	Galerne et al. (2008)	50.9738	15.02	0.6	0.99	23.833	7.94899	0.498089	0.593355	9.12	1.27	39	88.475	0.0626607	2.99824	2.26859	0.0325641	67.0648	0.233846
Golden Valley Sill Complex	dolerite	Galerne et al. (2008)	51.3382	15.12	0.61	1.07	24.0034	8.00191	0.506391	0.641303	11.34	1.46	39	95.885	0.0632837	2.99971	2.45859	0.0374359	66.8826	0.290769
Golden Valley Sill Complex	dolerite	Galerne et al. (2008)	51.116	15.33	0.7	1.07	23.8995	8.11305	0.581104	0.641303	11.62	1.33	37	100.47	0.0716258	2.94581	2.71541	0.0359459	63.8303	0.314054
Golden Valley Sill Complex	dolerite	Galerne et al. (2008)	51.175	14.04	0.58	0.98	23.9271	7.43035	0.481486	0.587362	9.97	1.14	42	88.48	0.0647999	3.22018	2.10667	0.0271429	66.3836	0.237381
Golden Valley Sill Complex	dolerite	Galerne et al. (2008)	51.3814	13	0.6	0.99	24.0236	6.87995	0.498089	0.593355	10.23	1.38	44	93.91	0.0723972	3.49182	2.13432	0.0313636	63.1834	0.2325
Golden Valley Sill Complex	dolerite	Galerne et al. (2008)	50.9208	15.87	0.68	0.91	23.8082	8.39883	0.564501	0.545408	9.24	1.23	36	93	0.0672118	2.83471	2.58333	0.0341667	58.646	0.256667
Golden Valley Sill Complex	dolerite	Galerne et al. (2008)	50.9292	15.89	0.61	0.94	23.8122	8.40942	0.506391	0.563388	9.63	1.2	35	85.505	0.0602171	2.83161	2.443	0.0342857	65.8895	0.275143
Golden Valley Sill Complex	dolerite	Galerne et al. (2008)	50.9882	15.27	0.61	0.99	23.8397	8.0813	0.506391	0.593355	9.94	1.43	37	87.45	0.062662	2.94999	2.36351	0.0386486	67.8508	0.268649
Golden Valley Sill Complex	dolerite	Galerne et al. (2008)	51.4011	15.02	0.65	1.1	24.0328	7.94899	0.539597	0.659284	11.22	1.53	39	93.01	0.0678824	3.02337	2.38487	0.0392308	70.8831	0.287692
Golden Valley Sill Complex	dolerite	Galerne et al. (2008)	51.97	15.29	0.69	1.08	24.2988	8.09188	0.572803	0.647297	11.18	1.45	38	101.19	0.0707873	3.00286	2.66289	0.0381579	63.9685	0.294211
Golden Valley Sill Complex	dolerite	Galerne et al. (2008)	50.8997	14.86	0.68	1.05	23.7984	7.86432	0.564501	0.629316	11.21	1.58	39	96.405	0.0717801	3.02612	2.47192	0.0405128	65.2784	0.287436
Golden Valley Sill Complex	dolerite	Galerne et al. (2008)	51.755	15.31	0.67	1.03	24.1982	8.10247	0.5562	0.617329	10.69	1.51	38	93.33	0.0686457	2.98653	2.45605	0.0397368	66.1448	0.281316
Golden Valley Sill Complex	dolerite	Galerne et al. (2008)	51.0865	15.07	0.69	1.11	23.8857	7.97545	0.572803	0.665277	10.66	1.52	37	96.17	0.0718207	2.9949	2.59919	0.0410811	69.1772	0.288108
Golden Valley Sill Complex	dolerite	Galerne et al. (2008)	50.8309	15.62	0.65	1.03	23.7662	8.26653	0.539597	0.617329	10.53	1.66	36	88.66	0.0652749	2.87499	2.46278	0.0461111	69.6289	0.2925
Golden Valley Sill Complex	dolerite	Galerne et al. (2008)	51.5584	15.38	0.63	0.98	24.1063	8.13951	0.522994	0.587362	10.56	1.42	37	93.56	0.0642537	2.96164	2.52865	0.0383784	62.7792	0.285405
Golden Valley Sill Complex	dolerite	Galerne et al. (2008)	51.0963	14.59	0.57	0.97	23.8903	7.72142	0.473185	0.581368	9.63	1.24	39	86.67	0.0612821	3.09403	2.22231	0.0317949	67.0784	0.246923
Golden Valley Sill Complex	dolerite	Galerne et al. (2008)	51.3126	15	0.7	1.02	23.9914	7.93841	0.581104	0.611336	11.39	1.74	37	97.63	0.0732016	3.0222	2.63865	0.047027	62.6176	0.307838
Golden Valley Sill Complex	dolerite	Galerne et al. (2008)	51.4601	15.36	0.66	0.96	24.0604	8.12893	0.547898	0.575375	10.74	1.57	37	97.8	0.067401	2.95984	2.64324	0.0424324	58.8318	0.29027
Golden Valley Sill Complex	dolerite	Galerne et al. (2008)	50.3591	14.78	0.61	1.08	23.5456	7.82198	0.506391	0.647297	10.33	1.32	39	93.45	0.0647395	3.01018	2.39615	0.0338462	69.2667	0.264872
Golden Valley Sill Complex	dolerite	Galerne et al. (2008)	50.6048	15.8	0.51	0.83	23.6605	8.36179	0.423376	0.49746	8.55	1.07	38	76.055	0.0506322	2.8296	2.00145	0.0281579	65.4079	0.225
Golden Valley Sill Complex	dolerite	Galerne et al. (2008)	50.0544	12.51	0.4	1.04	23.4031	6.62063	0.332059	0.623323	7.75	0.89	47	69.735	0.0501553	3.53488	1.48372	0.0189362	89.3845	0.164894
Golden Valley Sill Complex	dolerite	Galerne et al. (2008)	51.1553	15.34	0.61	1	23.9179	8.11834	0.506391	0.599349	10.48	1.27	37	91.965	0.0623761	2.94615	2.48554	0.0343243	65.1714	0.283243
Golden Valley Sill Complex	dolerite	Galerne et al. (2008)	50.4869	14.49	0.53	0.95	23.6053	7.6685	0.439979	0.569381	8.74	1	38	76.665	0.0573748	3.07822	2.0175	0.0263158	74.2688	0.23
Golden Valley Sill Complex	dolerite	Galerne et al. (2008)	51.1651	15.09	0.67	1.04	23.9225	7.98604	0.5562	0.623323	10.75	1.47	36	100.8	0.0696465	2.99554	2.8	0.0408333	61.8376	0.298611
Golden Valley Sill Complex	dolerite	Galerne et al. (2008)	50.8408	15.01	0.64	1.05	23.7708	7.9437	0.531295	0.629316	8.82	1.17	37	79.905	0.0668826	2.99241	2.15959	0.0316216	78.7581	0.238378
Golden Valley Sill Complex	dolerite	Galerne et al. (2008)	51.3126	15.13	0.61	1.03	23.9914	8.00721	0.506391	0.617329	10.42	1.28	38	92.88	0.0632419	2.99623	2.44421	0.0336842	66.4653	0.274211
Golden Valley Sill Complex	dolerite	Galerne et al. (2008)	50.8604	14.89	0.67	1.07	23.78	7.88019	0.5562	0.641303	11.49	1.36	37	97.635	0.070582	3.01769	2.63878	0.0367568	65.6838	0.310541
Golden Valley Sill Complex	dolerite	Galerne et al. (2008)	51.646	16.09	0.69	0.98	24.1473	8.51526	0.572803	0.587362	12.4	1.71	36	107	0.0672677	2.83577	2.97222	0.0475	54.8936	0.344444
Golden Valley Sill Complex	dolerite	Galerne et al. (2008)	51.4696	15.94	0.64	0.91	24.0648	8.43588	0.531295	0.545408	11.29	1.72	37	100	0.0629804	2.85267	2.7027	0.0464865	54.5408	0.305135
Golden Valley Sill Complex	dolerite	Galerne et al. (2008)	51.4108	15.75	0.65	1.05	24.0373	8.33533	0.539597	0.629316	10.87	1.54	38	104	0.0647361	2.88379	2.73684	0.0405263	60.5112	0.286053
Golden Valley Sill Complex	dolerite	Galerne et al. (2008)	51.5284	16.41	0.69	1	24.0923	8.68462	0.572803	0.599349	11.59	1.86	35	112	0.065956	2.77414	3.2	0.0531429	53.5133	0.331143
Golden Valley Sill Complex	dolerite	Galerne et al. (2008)	51.6656	16.53	0.7	0.99	24.1565	8.74812	0.581104	0.593355	11.7	1.68	35	108	0.0664261	2.76133	3.08571	0.048	54.9403	0.334286
Golden Valley Sill Complex	dolerite	Galerne et al. (2008)	51.9204	15.58	0.69	1	24.2756	8.24536	0.572803	0.599349	12.28	1.67	36	113	0.0694697	2.94415	3.13889	0.0463889	53.0397	0.341111
Golden Valley Sill Complex	dolerite	Galerne et al. (2008)	51.1168	15.24	0.57	0.95	23.8999	8.06542	0.473185	0.569381	10.45	1.33	38	92	0.0586683	2.96325	2.42105	0.035	61.8893	0.275
Golden Valley Sill Complex	dolerite	Galerne et al. (2008)	51.3128	14.88	0.63	0.98	23.9915	7.8749	0.522994	0.587362	11.34	1.56	40	100	0.0664127	3.04658	2.5	0.039	58.7362	0.2835
Golden Valley Sill Complex	dolerite	Galerne et al. (2008)	51.8322	15.1	0.74	1.07	24.2344	7.99133	0.61431	0.641303	12.81	1.69	40	113	0.0768721	3.03258	2.825	0.04225	56.7525	0.32025
Golden Valley Sill Complex	dolerite	Galerne et al. (2008)	51.3618	14.99	0.66	1	24.0144	7.93311	0.547898	0.599349	11	1.59	39	106	0.0690647	3.02711	2.71795	0.0407692	56.5424	0.282051
Golden Valley Sill Complex	dolerite	Galerne et al. (2008)	51.989	15.4	0.69	1.03	24.3077	8.1501	0.572803	0.617329	11.83	1.62	38	116	0.0702817	2.9825	3.05263	0.0426316	53.2181	0.311316
Golden Valley Sill Complex	dolerite	Galerne et al. (2008)	51.352	15.33	0.64	1.06	24.0098	8.11305	0.531295	0.63531	11.93	1.61	38	108	0.0654865	2.95941	2.84211	0.0423684	58.825	0.313947
Golden Valley Sill Complex	dolerite	Galerne et al. (2008)	51.4598	15.57	0.66	1.03	24.0602	8.24007	0.547898	0.617329	12.4	1.67	38	108	0.0664919	2.91991	2.84211	0.0439474	57.1601	0.326316
Golden Valley Sill Complex	dolerite	Galerne et al. (2008)	51.1756	15.11	0.74	1.06	23.9274	7.99662	0.61431	0.63531	11.83	1.36	38	102	0.0768212	2.99218	2.68421	0.0357895	62.2853	0.311316
Golden Valley Sill Complex	dolerite	Galerne et al. (2008)	50.9292	15.02	0.33	1.05	23.8122	7.94899	0.273949	0.629316	10.56	1.28	37	95.955	0.0344634	2.99562	2.59338	0.0345946	65.5845	0.285405
Golden Valley Sill Complex	dolerite	Galerne et al. (2008)	52.06	15.36	0.46	1.05	24.3409	8.12893	0.381868	0.629316	-	-	-	106	0.0469765	2.99435	-	-	59.3695	-
Golden Valley Sill Complex	dolerite	Galerne et al. (2008)	51.73	15.49	0.24	1.05	24.1866	8.19773	0.199236	0.629316	-	-	-	110	0.0243038	2.9504	-	-	57.2106	-
Golden Valley Sill Complex	dolerite	Galerne et al. (2008)	51.37	15.35	0.29	1.05	24.0183	8.12364	0.240743	0.629316	-	-	-	112	0.0296349	2.95659	-	-	56.189	-
Golden Valley Sill Complex	dolerite	Galerne et al. (2008)	52.7	15.7	0.7	1.07	24.6401	8.30887	0.581104	0.641303	-	-	-	102	0.0699378	2.96552	-	-	62.8729	-
Golden Valley Sill Complex	dolerite	Galerne et al. (2008)	51.7	15.65	0.64	1.01	24.1725	8.2824	0.531295	0.605342	-	-	-	102	0.0641474	2.91854	-	-	59.3473	-
Golden Valley Sill Complex	dolerite	Galerne et al. (2008)	52.08	15.54	0.72	1.06	24.3502	8.22419	0.597707	0.63531	-	-	-	108	0.0726767	2.9608	-	-	58.825	-
Golden Valley Sill Complex	dolerite	Galerne et al. (2008)	52.2	15.73	0.71	1.05	24.4063	8.32474	0.589406	0.629316	-	-	-	102	0.0708016	2.93178	-	-	61.6977	-
Golden Valley Sill Complex	dolerite	Galerne et al. (2008)	51.78	15.39	0.67	1.17	24.21	8.14481	0.5562	0.701238	-	-	-	109	0.0682889	2.97244	-	-	64.3338	-
Golden Valley Sill Complex	dolerite	Galerne et al. (2008)	51.98	15.88	0.65	0.99	24.3035	8.40413	0.539597	0.593355	-	-	-	99	0.0642061	2.89185	-	-	59.9349	-
Golden Valley Sill Complex	dolerite	Galerne et al. (2008)	52.09	15.5	0.74	1.08	24.3549	8.20302	0.61431	0.647297	-	-	-	107	0.0748883	2.96902	-	-	60.495	-
Golden Valley Sill Complex	dolerite	Galerne et al. (2008)	51.66	15.44	0.65	1.05	24.1538	8.17127	0.539597	0.629316	-	-	-	108	0.0660359	2.95595	-	-	58.27	-
Golden Valley Sill Complex	dolerite	Galerne et al. (2008)	52.39	15.54	0.72	1.06	24.4952	8.22419	0.597707	0.63531	-	-	-	102	0.0726767	2.97843	-	-	62.2853	-
Golden Valley Sill Complex	dolerite	Galerne et al. (2008)	51.98	15.32	0.68	1.03	24.3035	8.10776	0.564501	0.617329	-	-	-	94	0.0696248	2.99756	-	-	65.6733	-
Golden Valley Sill Complex	dolerite	Galerne et al. (2008)	52.06	15.51	0.72	1.06	24.3409	8.20831	0.597707	0.63531	-	-	-	102	0.0728173	2.96539	-	-	62.2853	-
Golden Valley Sill Complex	dolerite	Galerne et al. (2008)	51.94	15.46	0.71	1.02	24.2848	8.18185	0.589406	0.611336	-	-	-	100	0.0720382	2.96813	-	-	61.1336	-
Golden Valley Sill Complex	dolerite	Galerne et al. (2008)	51.69	15.87	0.63	0.95	24.1679	8.39883	0.522994	0.569381	-	-	-	90	0.0622698	2.87753	-	-	63.2646	-
Golden Valley Sill Complex	dolerite	Galerne et al. (2008)	52.02	15.68	0.67	0.98	24.3222	8.29828	0.5562	0.587362	-	-	-	102	0.0670259	2.93099	-	-	57.5845	-
Golden Valley Sill Complex	dolerite	Galerne et al. (2008)	52.09	15.45	0.65	1.06	24.3549	8.17656	0.539597	0.63531	-	-	-	102	0.0659931	2.97862	-	-	62.2853	-
Golden Valley Sill Complex	dolerite	Galerne et al. (2008)	52.03	15.61	0.68	1.06	24.3268	8.26124	0.564501	0.63531	-	-	-	97	0.0683313	2.9447	-	-	65.4959	-
Golden Valley Sill Complex	dolerite	Galerne et al. (2008)	52.02	15.55	0.7	1.01	24.3222	8.22948	0.581104	0.605342	-	-	-	98	0.0706125	2.95549	-	-	61.7696	-
Golden Valley Sill Complex	dolerite	Galerne et al. (2008)	52.23	15.67	0.71	1.05	24.4203	8.29299	0.589406	0.629316	-	-	-	102	0.0710727	2.9447	-	-	61.6977	-
Golden Valley Sill Complex	dolerite	Galerne et al. (2008)	52.2	15.64	0.64	0.99	24.4063	8.27711	0.531295	0.593355	-	-	-	99	0.0641885	2.94865	-	-	59.9349	-
Golden Valley Sill Complex	dolerite	Galerne et al. (2008)	51.93	15.49	0.66	1.02	24.2801	8.19773	0.547898	0.611336	-	-	-	93	0.0668354	2.96181	-	-	65.735	-
Golden Valley Sill Complex	dolerite	Galerne et al. (2008)	52.21	15.97	0.57	0.85	24.411	8.45176	0.473185	0.509447	-	-	-	79	0.0559865	2.88827	-	-	64.4869	-
Golden Valley Sill Complex	dolerite	Galerne et al. (2008)	52.19	15.68	0.69	0.96	24.4016	8.29828	0.572803	0.575375	-	-	-	91	0.0690266	2.94057	-	-	63.228	-
Golden Valley Sill Complex	dolerite	Galerne et al. (2008)	52.41	15.6	0.68	1.05	24.5045	8.25594	0.564501	0.629316	-	-	-	101	0.0683751	2.96811	-	-	62.3086	-
Golden Valley Sill Complex	dolerite	Galerne et al. (2008)	52.16	15.63	0.67	0.97	24.3876	8.27182	0.5562	0.581368	-	-	-	98	0.0672403	2.94828	-	-	59.3233	-
Golden Valley Sill Complex	dolerite	Galerne et al. (2008)	52.08	15.93	0.71	1.04	24.3502	8.43059	0.589406	0.623323	-	-	-	102	0.0699127	2.88832	-	-	61.1101	-
Golden Valley Sill Complex	dolerite	Galerne et al. (2008)	50.9698	15.15	0.45	1.01	23.8311	8.01779	0.373567	0.605342	10.59	1.44	37	103	0.0465922	2.97228	2.78378	0.0389189	58.7711	0.286216
Golden Valley Sill Complex	dolerite	Galerne et al. (2008)	50.8801	15.66	0.57	0.93	23.7892	8.2877	0.473185	0.557395	9.57	1.41	36	88.31	0.0570948	2.87042	2.45306	0.0391667	63.1179	0.265833
Golden Valley Sill Complex	dolerite	Galerne et al. (2008)	51.0865	15.67	0.62	0.94	23.8857	8.29299	0.514692	0.563388	10.23	1.26	36	89.39	0.0620635	2.88023	2.48306	0.035	63.0258	0.284167
Golden Valley Sill Complex	dolerite	Galerne et al. (2008)	51.4011	15.23	0.57	0.85	24.0328	8.06013	0.473185	0.509447	9.4	1.32	39	85.305	0.0587068	2.98169	2.18731	0.0338462	59.7206	0.241026
Golden Valley Sill Complex	dolerite	Galerne et al. (2008)	50.8997	15.13	0.57	0.95	23.7984	8.00721	0.473185	0.569381	8.78	1.19	37	80.28	0.0590949	2.97212	2.16973	0.0321622	70.9245	0.237297
Golden Valley Sill Complex	dolerite	Galerne et al. (2008)	50.8604	15.54	0.62	0.96	23.78	8.22419	0.514692	0.575375	9.03	1.28	36	81.73	0.0625827	2.89147	2.27028	0.0355556	70.3995	0.250833
Golden Valley Sill Complex	dolerite	Galerne et al. (2008)	50.2018	15.34	0.57	0.9	23.4721	8.11834	0.473185	0.539414	9.27	1.25	36	82.865	0.0582859	2.89124	2.30181	0.0347222	65.0955	0.2575
Golden Valley Sill Complex	dolerite	Galerne et al. (2008)	50.713	15.45	0.6	0.96	23.7111	8.17656	0.498089	0.575375	10.04	1.27	36	86.865	0.0609167	2.89988	2.41292	0.0352778	66.2378	0.278889
Golden Valley Sill Complex	dolerite	Galerne et al. (2008)	50.4896	15.56	0.64	0.89	23.6066	8.23477	0.531295	0.533421	9.56	1.15	37	92	0.0645185	2.8667	2.48649	0.0310811	57.9805	0.258378
Golden Valley Sill Complex	dolerite	Galerne et al. (2008)	51.7156	15.28	0.66	1.01	24.1799	8.08659	0.547898	0.605342	10.94	1.34	37	94.39	0.0677539	2.99012	2.55108	0.0362162	64.1321	0.295676
Golden Valley Sill Complex	dolerite	Galerne et al. (2008)	51.1455	15.2	0.63	1.08	23.9133	8.04425	0.522994	0.647297	10.71	1.37	38	95.385	0.0650146	2.97272	2.51013	0.0360526	67.8615	0.281842
Golden Valley Sill Complex	dolerite	Galerne et al. (2008)	51.0374	14.92	0.6	1.19	23.8627	7.89607	0.498089	0.713225	10.24	1.31	40	93.49	0.0630807	3.0221	2.33725	0.03275	76.2889	0.256
Golden Valley Sill Complex	dolerite	Galerne et al. (2008)	51.94	15.29	0.63	0.99	24.2848	8.09188	0.522994	0.593355	-	-	-	94	0.0646319	3.00113	-	-	63.1229	-
Golden Valley Sill Complex	dolerite	Galerne et al. (2008)	51.4	15.6	0.59	0.92	24.0323	8.25594	0.489788	0.551401	-	-	-	83	0.0593255	2.91091	-	-	66.4339	-
Golden Valley Sill Complex	dolerite	Galerne et al. (2008)	51.2867	14.61	0.68	1.09	23.9793	7.73201	0.564501	0.65329	10.78	2.01	38	97.85	0.0730083	3.1013	2.575	0.0528947	66.7645	0.283684
Golden Valley Sill Complex	dolerite	Galerne et al. (2008)	52.08	15.46	0.7	1.05	24.3502	8.18185	0.581104	0.629316	-	-	-	100	0.0710235	2.97613	-	-	62.9316	-
Golden Valley Sill Complex	dolerite	Galerne et al. (2008)	51.98	15.46	0.7	1.05	24.3035	8.18185	0.581104	0.629316	-	-	-	100	0.0710235	2.97041	-	-	62.9316	-
Golden Valley Sill Complex	dolerite	Galerne et al. (2008)	52.32	15.49	0.71	1.06	24.4624	8.19773	0.589406	0.63531	-	-	-	96	0.0718986	2.98405	-	-	66.1781	-
Golden Valley Sill Complex	dolerite	Galerne et al. (2008)	52.22	15.73	0.66	0.99	24.4157	8.32474	0.547898	0.593355	-	-	-	97	0.0658156	2.9329	-	-	61.1707	-
Golden Valley Sill Complex	dolerite	Galerne et al. (2008)	52.07	16.02	0.7	1.02	24.3455	8.47822	0.581104	0.611336	-	-	-	96	0.0685408	2.87154	-	-	63.6808	-
Golden Valley Sill Complex	dolerite	Galerne et al. (2008)	51.67	15.58	0.58	0.92	24.1585	8.24536	0.481486	0.551401	-	-	-	88	0.0583948	2.92995	-	-	62.6592	-
Golden Valley Sill Complex	dolerite	Galerne et al. (2008)	52.17	15.86	0.61	0.92	24.3923	8.39354	0.506391	0.551401	-	-	-	83	0.060331	2.90608	-	-	66.4339	-
Golden Valley Sill Complex	dolerite	Galerne et al. (2008)	52.12	15.41	0.6	0.82	24.3689	8.15539	0.498089	0.491466	-	-	-	83	0.0610748	2.98808	-	-	59.2128	-
Golden Valley Sill Complex	dolerite	Galerne et al. (2008)	52.3	15.81	0.76	1.05	24.4531	8.36708	0.630913	0.629316	-	-	-	106	0.0754042	2.92253	-	-	59.3695	-
Golden Valley Sill Complex	dolerite	Galerne et al. (2008)	51.98	15.58	0.71	1.06	24.3035	8.24536	0.589406	0.63531	-	-	-	98	0.0714833	2.94753	-	-	64.8275	-
Golden Valley Sill Complex	dolerite	Galerne et al. (2008)	52.12	15.95	0.67	0.99	24.3689	8.44117	0.5562	0.593355	-	-	-	90	0.0658913	2.88691	-	-	65.9284	-
Golden Valley Sill Complex	dolerite	Galerne et al. (2008)	51.7	15.54	0.65	1.01	24.1725	8.22419	0.539597	0.605342	-	-	-	100	0.0656109	2.9392	-	-	60.5342	-
Golden Valley Sill Complex	dolerite	Galerne et al. (2008)	52	15.56	0.68	1.02	24.3128	8.23477	0.564501	0.611336	-	-	-	96	0.0685509	2.95246	-	-	63.6808	-
Golden Valley Sill Complex	dolerite	Galerne et al. (2008)	51.74	15.41	0.63	0.96	24.1912	8.15539	0.522994	0.575375	-	-	-	90	0.0641286	2.96629	-	-	63.9306	-
Golden Valley Sill Complex	dolerite	Galerne et al. (2008)	51.48	15	0.61	0.96	24.0697	7.93841	0.506391	0.575375	-	-	-	85	0.06379	3.03205	-	-	67.6912	-
Golden Valley Sill Complex	dolerite	Galerne et al. (2008)	51.67	15.43	0.66	0.99	24.1585	8.16597	0.547898	0.593355	-	-	-	93	0.0670952	2.95844	-	-	63.8017	-
Golden Valley Sill Complex	dolerite	Galerne et al. (2008)	51.72	15.52	0.66	1	24.1819	8.21361	0.547898	0.599349	-	-	-	99	0.0667062	2.94413	-	-	60.5403	-
Golden Valley Sill Complex	dolerite	Galerne et al. (2008)	52.18	15.29	0.65	0.99	24.397	8.09188	0.539597	0.593355	-	-	-	87	0.0666837	3.01499	-	-	68.2018	-
Golden Valley Sill Complex	dolerite	Galerne et al. (2008)	51.77	15.47	0.68	1	24.2053	8.18714	0.564501	0.599349	-	-	-	101	0.0689497	2.9565	-	-	59.3415	-
Golden Valley Sill Complex	dolerite	Galerne et al. (2008)	51.8	15.15	0.69	1.01	24.2193	8.01779	0.572803	0.605342	-	-	-	96	0.0714414	3.02069	-	-	63.0565	-
Golden Valley Sill Complex	dolerite	Galerne et al. (2008)	51.73	15.56	0.63	1	24.1866	8.23477	0.522994	0.599349	-	-	-	90	0.0635104	2.93713	-	-	66.5943	-
Golden Valley Sill Complex	dolerite	Galerne et al. (2008)	51.95	15.88	0.69	1.03	24.2894	8.40413	0.572803	0.617329	-	-	-	97	0.0681573	2.89018	-	-	63.6422	-
Golden Valley Sill Complex	dolerite	Galerne et al. (2008)	51.61	15.43	0.7	1.05	24.1305	8.16597	0.581104	0.629316	-	-	-	101	0.0711616	2.955	-	-	62.3086	-
Golden Valley Sill Complex	dolerite	Galerne et al. (2008)	52.39	15.48	0.71	1.03	24.4952	8.19244	0.589406	0.617329	-	-	-	102	0.0719451	2.98997	-	-	60.5225	-
Golden Valley Sill Complex	dolerite	Galerne et al. (2008)	51.92	15.72	0.73	1.08	24.2754	8.31945	0.606008	0.647297	-	-	-	106	0.0728424	2.91791	-	-	61.0657	-
Golden Valley Sill Complex	dolerite	Galerne et al. (2008)	51.78	15.45	0.69	1.04	24.21	8.17656	0.572803	0.623323	-	-	-	97	0.0700542	2.9609	-	-	64.2601	-
Golden Valley Sill Complex	dolerite	Galerne et al. (2008)	52.16	15.68	0.7	0.98	24.3876	8.29828	0.581104	0.587362	-	-	-	102	0.070027	2.93888	-	-	57.5845	-
Golden Valley Sill Complex	dolerite	Galerne et al. (2008)	51.96	15.24	0.7	1.03	24.2941	8.06542	0.581104	0.617329	-	-	-	104	0.0720488	3.01213	-	-	59.3586	-
Golden Valley Sill Complex	dolerite	Galerne et al. (2008)	52.09	15.48	0.67	1.03	24.3549	8.19244	0.5562	0.617329	-	-	-	97	0.0678918	2.97285	-	-	63.6422	-
Golden Valley Sill Complex	dolerite	Galerne et al. (2008)	51.61	15.43	0.67	0.99	24.1305	8.16597	0.5562	0.593355	-	-	-	96	0.0681118	2.955	-	-	61.8079	-
Golden Valley Sill Complex	dolerite	Galerne et al. (2008)	51.54	15.57	0.66	0.97	24.0977	8.24007	0.547898	0.581368	-	-	-	96	0.0664919	2.92446	-	-	60.5592	-
Golden Valley Sill Complex	dolerite	Galerne et al. (2008)	51.71	15.8	0.59	0.96	24.1772	8.36179	0.489788	0.575375	-	-	-	86	0.0585745	2.89139	-	-	66.9041	-
Golden Valley Sill Complex	dolerite	Galerne et al. (2008)	51.84	15.61	0.67	1.04	24.238	8.26124	0.5562	0.623323	-	-	-	101	0.0673264	2.93394	-	-	61.7151	-
Golden Valley Sill Complex	dolerite	Galerne et al. (2008)	52.13	15.71	0.71	1.03	24.3736	8.31416	0.589406	0.617329	-	-	-	98	0.0708918	2.93158	-	-	62.9928	-
Golden Valley Sill Complex	dolerite	Galerne et al. (2008)	52.03	15.54	0.67	1.01	24.3268	8.22419	0.5562	0.605342	-	-	-	102	0.0676297	2.95796	-	-	59.3473	-
Golden Valley Sill Complex	dolerite	Galerne et al. (2008)	52.03	15.89	0.72	1.03	24.3268	8.40942	0.597707	0.617329	-	-	-	103	0.0710759	2.89281	-	-	59.9349	-
Golden Valley Sill Complex	dolerite	Galerne et al. (2008)	51.63	16.43	0.57	0.82	24.1398	8.6952	0.473185	0.491466	-	-	-	80	0.0544191	2.77622	-	-	61.4333	-
Golden Valley Sill Complex	dolerite	Galerne et al. (2008)	51.42	15.6	0.6	0.91	24.0416	8.25594	0.498089	0.545408	-	-	-	87	0.060331	2.91204	-	-	62.6905	-
Golden Valley Sill Complex	dolerite	Galerne et al. (2008)	51.92	16.15	0.66	0.94	24.2754	8.54702	0.547898	0.563388	-	-	-	92	0.064104	2.84022	-	-	61.2378	-
Golden Valley Sill Complex	dolerite	Galerne et al. (2008)	52.56	16.04	0.81	1.15	24.5746	8.4888	0.67242	0.689251	-	-	-	111	0.0792126	2.89495	-	-	62.0947	-
Golden Valley Sill Complex	dolerite	Galerne et al. (2008)	52.19	15.74	0.71	0.99	24.4016	8.33004	0.589406	0.593355	-	-	-	100	0.0707567	2.92936	-	-	59.3355	-
Golden Valley Sill Complex	dolerite	Galerne et al. (2008)	51.75	15.59	0.71	1.03	24.1959	8.25065	0.589406	0.617329	-	-	-	93	0.0714375	2.93261	-	-	66.3795	-
Golden Valley Sill Complex	dolerite	Galerne et al. (2008)	52.24	15.7	0.75	1.08	24.425	8.30887	0.622611	0.647297	-	-	-	104	0.0749334	2.93963	-	-	62.2401	-
Golden Valley Sill Complex	dolerite	Galerne et al. (2008)	51.2733	15.14	0.66	1.03	23.973	8.0125	0.547898	0.617329	12.02	1.49	37	102.96	0.0683804	2.99195	2.7827	0.0402703	59.9582	0.324865
Golden Valley Sill Complex	dolerite	Galerne et al. (2008)	50.8113	14.91	0.62	1.01	23.757	7.89078	0.514692	0.605342	11.03	1.55	39	98.28	0.0652271	3.01073	2.52	0.0397436	61.5937	0.282821
Golden Valley Sill Complex	dolerite	Galerne et al. (2008)	51.2438	15.09	0.63	0.98	23.9592	7.98604	0.522994	0.587362	10.77	1.53	38	95.38	0.0654885	3.00014	2.51	0.0402632	61.5813	0.283421
Golden Valley Sill Complex	dolerite	Galerne et al. (2008)	50.4476	15.42	0.55	0.9	23.587	8.16068	0.456582	0.539414	8.96	1.11	38	83.08	0.055949	2.89032	2.18632	0.0292105	64.9271	0.235789
Golden Valley Sill Complex	dolerite	Galerne et al. (2008)	50.5655	15.17	0.6	0.97	23.6421	8.02838	0.498089	0.581368	9.89	1.27	38	89.74	0.0620411	2.94482	2.36158	0.0334211	64.7836	0.260263
Golden Valley Sill Complex	dolerite	Galerne et al. (2008)	51.3814	15	0.68	1.06	24.0236	7.93841	0.564501	0.63531	12.56	1.86	37	97.125	0.0711101	3.02625	2.625	0.0502703	65.4116	0.339459
Golden Valley Sill Complex	dolerite	Galerne et al. (2008)	50.666	14.99	0.7	1.02	23.6891	7.93311	0.581104	0.611336	11.46	1.37	36	102	0.0732504	2.9861	2.83333	0.0380556	59.9349	0.318333
Golden Valley Sill Complex	dolerite	Galerne et al. (2008)	50.6048	14.87	0.67	1.06	23.6605	7.86961	0.5562	0.63531	11.53	1.52	38	96.74	0.0706769	3.00657	2.54579	0.04	65.6719	0.303421
Golden Valley Sill Complex	dolerite	Galerne et al. (2008)	50.9292	14.9	0.69	1.08	23.8122	7.88548	0.572803	0.647297	10.91	1.41	38	95.69	0.0726401	3.01975	2.51816	0.0371053	67.6452	0.287105
Golden Valley Sill Complex	dolerite	Galerne et al. (2008)	51.2638	14.39	0.78	1.13	23.9686	7.61558	0.647516	0.677264	11.55	1.47	39	107	0.0850252	3.14731	2.74359	0.0376923	63.2957	0.296154
Golden Valley Sill Complex	dolerite	Galerne et al. (2008)	51.009	14.75	0.86	1.09	23.8495	7.8061	0.713928	0.65329	10.79	1.48	38	106	0.0914577	3.05523	2.78947	0.0389474	61.6312	0.283947
Golden Valley Sill Complex	dolerite	Galerne et al. (2008)	50.6098	15.25	0.59	1	23.6628	8.07071	0.489788	0.599349	9.19	1.1	37	85.985	0.060687	2.93194	2.32392	0.0297297	69.7039	0.248378
Golden Valley Sill Complex	dolerite	Galerne et al. (2008)	50.372	14.47	0.71	1.03	23.5516	7.65792	0.589406	0.617329	10.21	1.26	39	97	0.0769668	3.07546	2.48718	0.0323077	63.6422	0.261795
Golden Valley Sill Complex	dolerite	Galerne et al. (2008)	50.7248	14.88	0.74	1.08	23.7166	7.8749	0.61431	0.647297	12.5	1.56	37	102	0.0780086	3.01167	2.75676	0.0421622	63.4605	0.337838
Golden Valley Sill Complex	dolerite	Galerne et al. (2008)	51.6656	15.05	0.8	1.21	24.1565	7.96487	0.664119	0.725212	13.98	1.72	38	115	0.083381	3.03288	3.02632	0.0452632	63.0619	0.367895
Golden Valley Sill Complex	dolerite	Galerne et al. (2008)	51.6987	15.2	0.66	1.05	24.1719	8.04425	0.547898	0.629316	11.04	1.42	38	97.51	0.0681105	3.00487	2.56605	0.0373684	64.5387	0.290526
Golden Valley Sill Complex	dolerite	Galerne et al. (2008)	51.0188	15.04	0.75	1.14	23.854	7.95958	0.622611	0.683258	12.17	1.56	37	105	0.0782217	2.9969	2.83784	0.0421622	65.0722	0.328919
Golden Valley Sill Complex	dolerite	Galerne et al. (2008)	50.7934	15.06	0.74	1.08	23.7487	7.97016	0.61431	0.647297	11.85	1.43	38	101	0.0770762	2.9797	2.65789	0.0376316	64.0888	0.311842
Golden Valley Sill Complex	dolerite	Galerne et al. (2008)	50.2152	15.12	0.62	1.09	23.4783	8.00191	0.514692	0.65329	11.88	1.4	38	106	0.0643211	2.93409	2.78947	0.0368421	61.6312	0.312632
Golden Valley Sill Complex	dolerite	Galerne et al. (2008)	51.3063	15.32	0.5	0.83	23.9885	8.10776	0.415074	0.49746	8.45	1.64	34	77.195	0.0511947	2.9587	2.27044	0.0482353	64.4419	0.248529
Golden Valley Sill Complex	dolerite	Galerne et al. (2008)	51.7968	15.55	0.55	0.9	24.2178	8.22948	0.456582	0.539414	9.07	2.08	37	84.06	0.0554812	2.94281	2.27189	0.0562162	64.1701	0.245135
Golden Valley Sill Complex	dolerite	Galerne et al. (2008)	51.8851	15.36	0.67	1.05	24.2591	8.12893	0.5562	0.629316	10.9	2.03	37	99.79	0.0684222	2.98429	2.69703	0.0548649	63.0641	0.294595
Golden Valley Sill Complex	dolerite	Galerne et al. (2008)	51.4338	14.92	0.66	1.09	24.0481	7.89607	0.547898	0.65329	11.72	2.4	39	102.13	0.0693887	3.04558	2.61872	0.0615385	63.9665	0.300513
Golden Valley Sill Complex	dolerite	Galerne et al. (2008)	51.5614	15.19	0.64	1.01	24.1077	8.03896	0.531295	0.605342	10.87	3.52	37	102.18	0.06609	2.99886	2.76162	0.0951351	59.2428	0.293784
Golden Valley Sill Complex	dolerite	Galerne et al. (2008)	51.581	15.16	0.67	1.01	24.1169	8.02308	0.5562	0.605342	12.71	28.22	38	125.87	0.0693249	3.00594	3.31237	0.742632	48.0927	0.334474
Golden Valley Sill Complex	dolerite	Galerne et al. (2008)	52.3644	15	0.74	1.08	24.4832	7.93841	0.61431	0.647297	12.21	1.9	37	99.115	0.0773845	3.08414	2.67878	0.0513514	65.3077	0.33
Golden Valley Sill Complex	dolerite	Galerne et al. (2008)	50.9882	14.18	0.78	1.35	23.8397	7.50444	0.647516	0.809121	11.45	1.6	39	108.43	0.0862844	3.17675	2.78026	0.0410256	74.6215	0.29359
Golden Valley Sill Complex	dolerite	Galerne et al. (2008)	50.9784	14.13	0.78	1.45	23.8351	7.47798	0.647516	0.869056	12.23	1.86	37	119.59	0.0865897	3.18738	3.23216	0.0502703	72.6696	0.330541
Golden Valley Sill Complex	dolerite	Galerne et al. (2008)	51.8336	14.49	0.69	1.33	24.235	7.6685	0.572803	0.797134	11.86	1.75	37	113.125	0.0746955	3.16033	3.05743	0.0472973	70.4649	0.320541
Golden Valley Sill Complex	dolerite	Galerne et al. (2008)	52.0498	14.92	0.7	1.07	24.3361	7.89607	0.581104	0.641303	11.84	1.84	37	99.575	0.0735941	3.08206	2.69122	0.0497297	64.4041	0.32
Golden Valley Sill Complex	dolerite	Galerne et al. (2008)	51.2965	14.65	0.8	1.16	23.9839	7.75318	0.664119	0.695245	11.4	2	37	102.85	0.0856576	3.09343	2.77973	0.0540541	67.5979	0.308108
Golden Valley Sill Complex	dolerite	Galerne et al. (2008)	50.5019	14.45	0.68	1.18	23.6124	7.64733	0.564501	0.707232	11.24	1.7	37	97.47	0.0738167	3.08766	2.63432	0.0459459	72.5589	0.303784
Golden Valley Sill Complex	dolerite	Galerne et al. (2008)	51.4044	14.66	0.8	1.19	24.0343	7.75847	0.664119	0.713225	12.86	2.21	36	108.39	0.0855992	3.09782	3.01083	0.0613889	65.8018	0.357222
Golden Valley Sill Complex	dolerite	Galerne et al. (2008)	51.6693	14.48	0.75	1.25	24.1582	7.66321	0.622611	0.749186	13.33	2.69	39	112.9	0.0812468	3.15249	2.89487	0.0689744	66.3584	0.341795
Golden Valley Sill Complex	dolerite	Galerne et al. (2008)	51.581	14.76	0.73	1.13	24.1169	7.81139	0.606008	0.677264	12.49	2	37	103.13	0.0775801	3.0874	2.7873	0.0540541	65.6709	0.337568
Golden Valley Sill Complex	dolerite	Galerne et al. (2008)	50.5876	14.74	0.76	1.07	23.6524	7.80081	0.630913	0.641303	13.787	1.92	37	97	0.0808779	3.03205	2.62162	0.0518919	66.1137	0.372622
Golden Valley Sill Complex	dolerite	Galerne et al. (2008)	51.352	14.64	0.77	1.14	24.0098	7.74789	0.639214	0.683258	13.6925	2.04	38	106	0.0825018	3.09889	2.78947	0.0536842	64.4583	0.360329
Golden Valley Sill Complex	dolerite	Galerne et al. (2008)	51.4142	14.96	0.72	1.15	24.0389	7.91724	0.597707	0.689251	11.69	1.78	36	96.835	0.0754944	3.03628	2.68986	0.0494444	71.1779	0.324722
Golden Valley Sill Complex	dolerite	Galerne et al. (2008)	50.4504	14.4	0.76	1.15	23.5883	7.62087	0.630913	0.689251	13.304	2.14	37	104	0.0827875	3.09522	2.81081	0.0578378	66.2742	0.359568
Golden Valley Sill Complex	dolerite	Galerne et al. (2008)	49.8134	14.22	0.79	1.12	23.2905	7.52561	0.655817	0.671271	12.485	1.84	36	102	0.0871448	3.09483	2.83333	0.0511111	65.8109	0.346806
Golden Valley Sill Complex	dolerite	Galerne et al. (2008)	51.0972	14.65	0.8	1.14	23.8907	7.75318	0.664119	0.683258	13.22	2.13	37	105	0.0856576	3.08141	2.83784	0.0575676	65.0722	0.357297
Golden Valley Sill Complex	dolerite	Galerne et al. (2008)	50.5876	14.34	0.82	1.22	23.6524	7.58912	0.680722	0.731206	12.821	1.82	39	102	0.0896971	3.11663	2.61538	0.0466667	71.6868	0.328744
Golden Valley Sill Complex	dolerite	Galerne et al. (2008)	51.375	14.59	0.75	1.22	24.0206	7.72142	0.622611	0.731206	12.76	2.08	38	107.33	0.0806343	3.1109	2.82447	0.0547368	68.1269	0.335789
Golden Valley Sill Complex	dolerite	Galerne et al. (2008)	51.107	14.72	0.74	1.07	23.8953	7.79022	0.61431	0.641303	13.22	1.92	38	104	0.0788565	3.06734	2.73684	0.0505263	61.6638	0.347895
Golden Valley Sill Complex	dolerite	Galerne et al. (2008)	51.352	14.75	0.77	1.07	24.0098	7.8061	0.639214	0.641303	15.6665	2.14	39	100	0.0818865	3.07578	2.5641	0.0548718	64.1303	0.401705
Golden Valley Sill Complex	dolerite	Galerne et al. (2008)	51.1984	14.38	0.41	1.29	23.938	7.61029	0.340361	0.77316	9.53	1.35	40	96.95	0.0447238	3.14548	2.42375	0.03375	79.7483	0.23825
Golden Valley Sill Complex	dolerite	Galerne et al. (2008)	50.8256	14.4	0.36	1.2	23.7637	7.62087	0.298854	0.719219	8.66	1.24	39	92.06	0.0392151	3.11824	2.36051	0.0317949	78.125	0.222051
Golden Valley Sill Complex	dolerite	Galerne et al. (2008)	51.0807	14.37	0.38	1.27	23.883	7.60499	0.315456	0.761173	9.24	1.33	40	96.47	0.0414802	3.14043	2.41175	0.03325	78.9026	0.231
Golden Valley Sill Complex	dolerite	Galerne et al. (2008)	51.4044	14.39	0.45	1.23	24.0343	7.61558	0.373567	0.737199	9.39	1.41	41	97.45	0.049053	3.15594	2.37683	0.0343902	75.649	0.229024
Golden Valley Sill Complex	dolerite	Galerne et al. (2008)	50.2348	14.06	0.4	1.3	23.4875	7.44093	0.332059	0.779154	10.133	1.37	39	97	0.044626	3.15652	2.48718	0.0351282	80.3251	0.259821
Golden Valley Sill Complex	dolerite	Galerne et al. (2008)	50.5582	14.08	0.56	1.25	23.6387	7.45152	0.464883	0.749186	9.818	1.33	41	101	0.0623877	3.17233	2.46341	0.032439	74.1768	0.239463
Golden Valley Sill Complex	dolerite	Galerne et al. (2008)	51.0512	14.34	0.54	1.3	23.8692	7.58912	0.44828	0.779154	9.29	1.39	40	95.035	0.0590688	3.14519	2.37587	0.03475	81.986	0.23225
Golden Valley Sill Complex	dolerite	Galerne et al. (2008)	50.1956	14.03	0.52	1.22	23.4692	7.42506	0.431677	0.731206	9.3875	1.28	40	98	0.0581379	3.16081	2.45	0.032	74.6128	0.234687
Golden Valley Sill Complex	dolerite	Galerne et al. (2008)	50.4504	14.07	0.59	1.26	23.5883	7.44623	0.489788	0.75518	9.566	1.31	41	97	0.0657766	3.16782	2.36585	0.0319512	77.8536	0.233317
Golden Valley Sill Complex	dolerite	Galerne et al. (2008)	50.5386	14.17	0.58	1.26	23.6295	7.49915	0.481486	0.75518	10.1015	1.35	41	97	0.0642054	3.15096	2.36585	0.0329268	77.8536	0.246378
Golden Valley Sill Complex	dolerite	Galerne et al. (2008)	50.9335	14.58	0.56	1.23	23.8142	7.71613	0.464883	0.737199	8.8	1.21	42	92.02	0.0602482	3.08628	2.19095	0.0288095	80.1129	0.209524
Golden Valley Sill Complex	dolerite	Galerne et al. (2008)	50.8424	14.06	0.56	1.21	23.7716	7.44093	0.464883	0.725212	9.734	1.36	40	97	0.0624765	3.1947	2.425	0.034	74.7641	0.24335
Golden Valley Sill Complex	dolerite	Galerne et al. (2008)	50.4332	15.38	0.44	0.99	23.5803	8.13951	0.365265	0.593355	8.29	1.36	34	69.685	0.0448756	2.89701	2.04956	0.04	85.1482	0.243824
Golden Valley Sill Complex	dolerite	Galerne et al. (2008)	50.1683	15.89	0.45	0.92	23.4564	8.40942	0.373567	0.551401	7.51	1.1	30	61.04	0.0444224	2.7893	2.03467	0.0366667	90.3344	0.250333
Golden Valley Sill Complex	dolerite	Galerne et al. (2008)	49.825	16.3	0.41	0.83	23.2959	8.6264	0.340361	0.49746	6.66	0.84	28	55.42	0.0394557	2.70053	1.97929	0.03	89.7618	0.237857
Golden Valley Sill Complex	dolerite	Galerne et al. (2008)	49.9525	16.23	0.4	0.88	23.3555	8.58936	0.332059	0.527427	7.15	1.02	28	55.435	0.0386594	2.71912	1.97982	0.0364286	95.1433	0.255357
Golden Valley Sill Complex	dolerite	Galerne et al. (2008)	52.0715	14.71	0.51	1.15	24.3462	7.78493	0.423376	0.689251	10.12	2.29	37	80.185	0.054384	3.12735	2.16716	0.0618919	85.9576	0.273514
Golden Valley Sill Complex	dolerite	Galerne et al. (2008)	49.5405	15.8	0.4	0.83	23.1629	8.36179	0.332059	0.49746	6.73	1.08	29	61.235	0.0397115	2.77008	2.11155	0.0372414	81.2378	0.232069
Golden Valley Sill Complex	dolerite	Galerne et al. (2008)	50.5804	16.01	0.51	1.02	23.6491	8.47293	0.423376	0.611336	7.94	1.77	33	69.925	0.0499681	2.79113	2.11894	0.0536364	87.4274	0.240606
Golden Valley Sill Complex	dolerite	Galerne et al. (2008)	52.27	16.51	0.72	1.05	24.4391	8.73754	0.597707	0.629316	-	-	-	77	0.0684068	2.79702	-	-	81.7294	-
Golden Valley Sill Complex	dolerite	Galerne et al. (2008)	50.5484	15.28	0.46	0.97	23.6341	8.08659	0.381868	0.581368	9.25	1.85	35	85	0.0472224	2.92263	2.42857	0.0528571	68.3963	0.264286
Golden Valley Sill Complex	dolerite	Galerne et al. (2008)	49.833	15.26	0.45	0.93	23.2996	8.07601	0.373567	0.557395	6.77	0.83	34	78	0.0462564	2.88504	2.29412	0.0244118	71.4608	0.199118
Golden Valley Sill Complex	dolerite	Galerne et al. (2008)	49	15.18	0.43	0.9	22.9101	8.03367	0.356964	0.539414	6.87	0.75	33	76	0.0444335	2.85177	2.30303	0.0227273	70.9755	0.208182
Golden Valley Sill Complex	dolerite	Galerne et al. (2008)	49.1568	15.21	0.44	0.85	22.9835	8.04954	0.365265	0.509447	6.55	0.66	33	74	0.0453771	2.85525	2.24242	0.02	68.8441	0.198485
Golden Valley Sill Complex	dolerite	Galerne et al. (2008)	50.2054	15.99	0.39	0.77	23.4737	8.46234	0.323758	0.461499	6.13	0.8	34	71	0.0382587	2.77391	2.08824	0.0235294	64.9998	0.180294
Golden Valley Sill Complex	dolerite	Galerne et al. (2008)	51.2736	14.71	0.46	0.86	23.9732	7.78493	0.381868	0.51544	6.89	0.8	39	71	0.0490522	3.07943	1.82051	0.0205128	72.5972	0.176667
Golden Valley Sill Complex	dolerite	Galerne et al. (2008)	50.3426	15.46	0.42	0.93	23.5379	8.18185	0.348662	0.557395	6.64	0.71	33	77	0.0426141	2.87684	2.33333	0.0215152	72.3889	0.201212
Golden Valley Sill Complex	dolerite	Galerne et al. (2008)	50.6684	15.36	0.56	0.94	23.6902	8.12893	0.464883	0.563388	9.36	1.47	36	83.95	0.0571887	2.91431	2.33194	0.0408333	67.1099	0.26
Golden Valley Sill Complex	dolerite	Galerne et al. (2008)	50.7767	15.31	0.58	0.9	23.7409	8.10247	0.481486	0.539414	9.63	1.38	35	90.145	0.0594246	2.93008	2.57557	0.0394286	59.8385	0.275143
Golden Valley Sill Complex	dolerite	Galerne et al. (2008)	50.6783	15.37	0.58	0.91	23.6948	8.13422	0.481486	0.545408	9.55	1.19	36	85.01	0.0591927	2.91298	2.36139	0.0330556	64.158	0.265278
Golden Valley Sill Complex	dolerite	Galerne et al. (2008)	50.7965	15.57	0.59	0.91	23.7501	8.24007	0.489788	0.545408	9.19	1.2	36	82.415	0.0594398	2.88227	2.28931	0.0333333	66.1782	0.255278
Golden Valley Sill Complex	dolerite	Galerne et al. (2008)	50.6093	15.71	0.55	0.89	23.6626	8.31416	0.456582	0.533421	9.29	2.03	36	79.035	0.0549162	2.84606	2.19542	0.0563889	67.4917	0.258056
Golden Valley Sill Complex	dolerite	Galerne et al. (2008)	51.2594	15.62	0.67	0.94	23.9665	8.26653	0.5562	0.563388	10.07	1.34	37	85.97	0.0672833	2.89923	2.32351	0.0362162	65.5331	0.272162
Golden Valley Sill Complex	dolerite	Galerne et al. (2008)	50.1562	15.35	0.59	0.94	23.4507	8.12364	0.489788	0.563388	8.93	1.15	36	79.805	0.0602917	2.88673	2.21681	0.0319444	70.5956	0.248056
Golden Valley Sill Complex	dolerite	Galerne et al. (2008)	50.5305	15.44	0.57	0.91	23.6257	8.17127	0.473185	0.545408	10.15	1.54	36	82.355	0.0579084	2.89132	2.28764	0.0427778	66.2264	0.281944
Golden Valley Sill Complex	dolerite	Galerne et al. (2008)	50.5582	15.58	0.45	0.95	23.6387	8.24536	0.373567	0.569381	6.9095	0	36	78	0.0453063	2.86691	2.16667	0	72.9976	0.191931
Golden Valley Sill Complex	dolerite	Galerne et al. (2008)	50.6758	15.34	0.11	0.89	23.6937	8.11834	0.0913163	0.533421	7.8	0	35	78	0.0112481	2.91854	2.22857	0	68.3873	0.222857
Golden Valley Sill Complex	dolerite	Galerne et al. (2008)	49.7252	14.77	0.48	0.98	23.2492	7.81668	0.398471	0.587362	7.05	0	37	79	0.050977	2.97431	2.13514	0	74.3496	0.190541
Golden Valley Sill Complex	dolerite	Galerne et al. (2008)	49.7154	15.63	0.43	0.88	23.2446	8.27182	0.356964	0.527427	5.68	0	33	71	0.0431542	2.8101	2.15152	0	74.2855	0.172121
Golden Valley Sill Complex	dolerite	Galerne et al. (2008)	51.42	15.82	0.44	0.94	24.0416	8.37237	0.365265	0.563388	-	-	-	77	0.0436275	2.87154	-	-	73.1673	-
Golden Valley Sill Complex	dolerite	Galerne et al. (2008)	51.07	15.64	0.13	0.94	23.878	8.27711	0.107919	0.563388	-	-	-	79	0.0130383	2.88482	-	-	71.3149	-
Golden Valley Sill Complex	dolerite	Galerne et al. (2008)	51.51	15.9	0.12	0.94	24.0837	8.41471	0.0996178	0.563388	-	-	-	76	0.0118385	2.8621	-	-	74.13	-
Golden Valley Sill Complex	dolerite	Galerne et al. (2008)	51.31	15.91	0.23	0.94	23.9902	8.42	0.190934	0.563388	-	-	-	73	0.0226763	2.84919	-	-	77.1764	-
Golden Valley Sill Complex	dolerite	Galerne et al. (2008)	51.83	15.17	0.39	1	24.2333	8.02838	0.323758	0.599349	-	-	-	82	0.0403267	3.01846	-	-	73.0913	-
Golden Valley Sill Complex	dolerite	Galerne et al. (2008)	51.45	15.43	0.35	0.97	24.0557	8.16597	0.290552	0.581368	-	-	-	77	0.0355808	2.94584	-	-	75.5024	-
Golden Valley Sill Complex	dolerite	Galerne et al. (2008)	51.78	15.74	0.37	1.04	24.21	8.33004	0.307155	0.623323	-	-	-	107	0.0368732	2.90634	-	-	58.2545	-
Golden Valley Sill Complex	dolerite	Galerne et al. (2008)	51.83	15.39	0.67	1.04	24.2333	8.14481	0.5562	0.623323	-	-	-	107	0.0682889	2.97531	-	-	58.2545	-
Golden Valley Sill Complex	dolerite	Galerne et al. (2008)	52.14	15.65	0.62	1.05	24.3783	8.2824	0.514692	0.629316	-	-	-	113	0.0621428	2.94338	-	-	55.6917	-
Golden Valley Sill Complex	dolerite	Galerne et al. (2008)	49.45	17.58	0.53	1.03	23.1205	9.30381	0.439979	0.617329	-	-	-	113	0.0472902	2.48506	-	-	54.6309	-
Golden Valley Sill Complex	dolerite	Galerne et al. (2008)	51.02	16.38	0.59	1.02	23.8546	8.66874	0.489788	0.611336	-	-	-	106	0.0565004	2.7518	-	-	57.6732	-
Golden Valley Sill Complex	dolerite	Galerne et al. (2008)	53.0127	14.72	0.77	1.36	24.7863	7.79022	0.639214	0.815115	11.42	1.84	31	95.855	0.0820534	3.18172	3.0921	0.0593548	85.0362	0.368387
Golden Valley Sill Complex	dolerite	Galerne et al. (2008)	52.599	14.61	0.79	1.38	24.5929	7.73201	0.655817	0.827102	11.93	1.75	31	93.76	0.0848185	3.18066	3.02452	0.0564516	88.2148	0.384839
Golden Valley Sill Complex	dolerite	Galerne et al. (2008)	52.9536	14.71	0.88	1.32	24.7587	7.78493	0.730531	0.791141	12.02	2.04	30	94.94	0.0938391	3.18033	3.16467	0.068	83.3306	0.400667
Golden Valley Sill Complex	dolerite	Galerne et al. (2008)	53.1112	14.62	0.5	1.4	24.8324	7.7373	0.415074	0.839089	11.69	2.06	31	92.745	0.0536459	3.20943	2.99177	0.0664516	90.4726	0.377097
L21 sill	dolerite	Neumann et al. (2011)	50.4332	15.38	0.44	0.99	23.5803	8.13951	0.365265	0.593355	8.29	1.36	34	69.685	0.0448756	2.89701	2.04956	0.04	85.1482	0.243824
L21 sill	dolerite	Neumann et al. (2011)	50.1683	15.89	0.45	0.92	23.4564	8.40942	0.373567	0.551401	7.51	1.1	30	61.04	0.0444224	2.7893	2.03467	0.0366667	90.3344	0.250333
L21 sill	dolerite	Neumann et al. (2011)	49.9525	16.23	0.4	0.88	23.3555	8.58936	0.332059	0.527427	7.15	1.02	28	55.435	0.0386594	2.71912	1.97982	0.0364286	95.1433	0.255357
Golden Valley Sill	dolerite	Neumann et al. (2011)	51.303	15.45	0.72	1.07	23.9869	8.17656	0.597707	0.641303	12.32	1.79	38	111	0.0731001	2.93362	2.92105	0.0471053	57.7751	0.324211
Golden Valley Sill	dolerite	Neumann et al. (2011)	51.4696	15.4	0.65	1.01	24.0648	8.1501	0.539597	0.605342	11.71	1.76	38	103	0.0662074	2.9527	2.71053	0.0463158	58.7711	0.308158
Golden Valley Sill	dolerite	Neumann et al. (2011)	51.989	15.29	0.7	1.07	24.3077	8.09188	0.581104	0.641303	12.74	1.61	38	110	0.0718132	3.00396	2.89474	0.0423684	58.3003	0.335263
Morning Sun sill	dolerite	Neumann et al. (2011)	49.9506	15.46	0.42	0.93	23.3546	8.18185	0.348662	0.557395	7.79	0	35	75	0.0426141	2.85444	2.14286	0	74.3193	0.222571
Glen Sill	dolerite	Neumann et al. (2011)	50.4476	15.42	0.55	0.9	23.587	8.16068	0.456582	0.539414	8.96	1.11	38	83.08	0.055949	2.89032	2.18632	0.0292105	64.9271	0.235789
Harmony Sill	dolerite	Neumann et al. (2011)	52.4202	15.06	0.91	1.2	24.5093	7.97016	0.755435	0.719219	12.02	2.06	29	111	0.0947829	3.07513	3.82759	0.0710345	64.7945	0.414483
Harmony Sill	dolerite	Neumann et al. (2011)	54.6809	13.33	1.49	1.76	25.5663	7.0546	1.23692	1.05485	18.43	3.47	35	160.715	0.175335	3.62406	4.59186	0.0991429	65.6351	0.526571
Harmony Sill	dolerite	Neumann et al. (2011)	53.0721	15.19	0.82	1.26	24.8141	8.03896	0.680722	0.75518	12.3	1.91	30	109.705	0.0846778	3.08673	3.65683	0.0636667	68.8373	0.41
Harmony Sill	dolerite	Neumann et al. (2011)	52.9592	15.64	0.91	1.14	24.7613	8.27711	0.755435	0.683258	13.89	2.02	27	106	0.091268	2.99154	3.92593	0.0748148	64.4583	0.514444
Cradock Dyke	dolerite	Neumann et al. (2011)	51.2965	14.65	0.8	1.16	23.9839	7.75318	0.664119	0.695245	11.4	2	37	102.85	0.0856576	3.09343	2.77973	0.0540541	67.5979	0.308108
Cradock Dyke	dolerite	Neumann et al. (2011)	50.5876	14.74	0.76	1.07	23.6524	7.80081	0.630913	0.641303	13.787	1.92	37	97	0.0808779	3.03205	2.62162	0.0518919	66.1137	0.372622
Cradock Dyke	dolerite	Neumann et al. (2011)	51.352	14.75	0.77	1.07	24.0098	7.8061	0.639214	0.641303	15.6665	2.14	39	100	0.0818865	3.07578	2.5641	0.0548718	64.1303	0.401705
Golden Valley Dyke	dolerite	Neumann et al. (2011)	50.8256	14.4	0.36	1.2	23.7637	7.62087	0.298854	0.719219	8.66	1.24	39	92.06	0.0392151	3.11824	2.36051	0.0317949	78.125	0.222051
Golden Valley Dyke	dolerite	Neumann et al. (2011)	51.0807	14.37	0.38	1.27	23.883	7.60499	0.315456	0.761173	9.24	1.33	40	96.47	0.0414802	3.14043	2.41175	0.03325	78.9026	0.231
Golden Valley Dyke	dolerite	Neumann et al. (2011)	50.9335	14.58	0.56	1.23	23.8142	7.71613	0.464883	0.737199	8.8	1.21	42	92.02	0.0602482	3.08628	2.19095	0.0288095	80.1129	0.209524
Drakensberg (Lesotho)	basalt	Luttinen (2018)	50.51	14.92	0.67	1.425	23.6162	7.89607	0.5562	0.854072	14.04	1.56	48	120	0.0704401	2.99088	2.5	0.0325	71.1727	0.2925
Drakensberg (Lesotho)	basalt	Luttinen (2018)	52.88	14.01	0.82	1.452	24.7243	7.41447	0.680722	0.870255	14.41	1.58	44	122	0.0918099	3.33459	2.77273	0.0359091	71.3323	0.3275
Drakensberg (Lesotho)	basalt	Luttinen (2018)	51	14.38	1.45	1.426	23.8453	7.61029	1.20372	0.854672	15.45	1.82	45	136	0.15817	3.13329	3.02222	0.0404444	62.8435	0.343333
Drakensberg (Lesotho)	basalt	Luttinen (2018)	51.34	13.89	0.76	1.326	24.0042	7.35097	0.630913	0.794737	13.23	1.71	45	120	0.0858272	3.26545	2.66667	0.038	66.2281	0.294
Drakensberg (Lesotho)	basalt	Luttinen (2018)	51.07	14.49	0.57	1.438	23.878	7.6685	0.473185	0.861864	14.04	1.68	41	124	0.061705	3.11377	3.02439	0.0409756	69.5051	0.342439
Drakensberg (Lesotho)	basalt	Luttinen (2018)	51.55	13.55	0.86	1.417	24.1024	7.17103	0.713928	0.849277	15.36	1.81	42	129	0.0995573	3.36108	3.07143	0.0430952	65.8355	0.365714
Drakensberg (Lesotho)	basalt	Luttinen (2018)	52.39	14.54	0.86	1.27	24.4952	7.69496	0.713928	0.761173	16.09	1.88	36	122	0.0927786	3.18327	3.38889	0.0522222	62.3912	0.446944
Drakensberg (Lesotho)	basalt	Luttinen (2018)	52.55	14.13	0.9	1.344	24.57	7.47798	0.747134	0.805525	16.85	1.76	37	130	0.0999112	3.28564	3.51351	0.0475676	61.9635	0.455405
Drakensberg (Lesotho)	basalt	Luttinen (2018)	51.47	15.01	0.74	1.023	24.065	7.9437	0.61431	0.613134	12.47	1.47	38	103	0.077333	3.02945	2.71053	0.0386842	59.5276	0.328158
Drakensberg (Lesotho)	basalt	Luttinen (2018)	50.69	14.84	0.74	1.044	23.7003	7.85373	0.61431	0.62572	11.15	1.24	37	97	0.0782189	3.01771	2.62162	0.0335135	64.5072	0.301351
Drakensberg (Lesotho)	basalt	Luttinen (2018)	51.58	13.32	0.55	1.625	24.1164	7.04931	0.456582	0.973942	10.63	1.29	40	116	0.0647697	3.42111	2.9	0.03225	83.9605	0.26575
Drakensberg (Lesotho)	basalt	Luttinen (2018)	53.84	14.77	0.68	1.166	25.1731	7.81668	0.564501	0.698841	12.9	1.6	40	109	0.0722175	3.22043	2.725	0.04	64.1138	0.3225
Drakensberg (Lesotho)	basalt	Luttinen (2018)	50.58	15.11	0.78	1.077	23.6489	7.99662	0.647516	0.645499	11.3	1.41	41	106	0.0809737	2.95736	2.58537	0.0343902	60.8961	0.27561
Drakensberg (Lesotho)	basalt	Luttinen (2018)	51.89	15.04	0.87	1.03	24.2614	7.95958	0.722229	0.617329	12.66	1.39	43	108	0.0907372	3.04807	2.51163	0.0323256	57.1601	0.294419
Drakensberg (Lesotho)	basalt	Luttinen (2018)	51.11	14.04	0.56	1.13	23.8967	7.43035	0.464883	0.677264	12.87	1.67	45	105	0.0625655	3.21609	2.33333	0.0371111	64.5014	0.286
Drakensberg (Lesotho)	basalt	Luttinen (2018)	51.07	15.53	1.61	0.945	23.878	8.2189	1.33654	0.566385	10.75	1.25	41	97	0.162618	2.90525	2.36585	0.0304878	58.3902	0.262195
Drakensberg (Lesotho)	basalt	Luttinen (2018)	50.27	14.19	0.6	1.193	23.5039	7.50973	0.498089	0.715023	12.47	1.43	45	113	0.0663258	3.1298	2.51111	0.0317778	63.2764	0.277111
Drakensberg (Lesotho)	basalt	Luttinen (2018)	52.84	15.13	0.72	1.123	24.7056	8.00721	0.597707	0.673069	12.62	1.35	42	109	0.0746461	3.08542	2.59524	0.0321429	61.7494	0.300476
Drakensberg (Lesotho)	basalt	Luttinen (2018)	52.22	15.12	0.61	0.952	24.4157	8.00191	0.506391	0.57058	11.9	1.36	39	105	0.0632837	3.05123	2.69231	0.0348718	54.341	0.305128
Drakensberg (Lesotho)	basalt	Luttinen (2018)	50.59	14.11	0.93	1.008	23.6536	7.4674	0.772038	0.604144	11.71	1.43	40	104	0.103388	3.16758	2.6	0.03575	58.0907	0.29275
Drakensberg (Lesotho)	basalt	Luttinen (2018)	51.21	15.34	0.67	0.893	23.9434	8.11834	0.5562	0.535219	11.47	1.35	32	96	0.0685115	2.9493	3	0.0421875	55.7519	0.358438
Drakensberg (Lesotho)	basalt	Luttinen (2018)	51.14	15.5	0.76	0.872	23.9107	8.20302	0.630913	0.522632	9.36	1	30	92	0.0769123	2.91487	3.06667	0.0333333	56.8079	0.312
Drakensberg (Lesotho)	basalt	Luttinen (2018)	51.3	14.51	0.81	1.008	23.9855	7.67909	0.67242	0.604144	12.79	1.31	39	105	0.0875652	3.12349	2.69231	0.0335897	57.5375	0.327949
Drakensberg (Lesotho)	basalt	Luttinen (2018)	51.56	15.16	0.67	0.905	24.1071	8.02308	0.5562	0.542411	10.66	1.25	39	98	0.0693249	3.00472	2.51282	0.0320513	55.348	0.273333
Drakensberg (Lesotho)	basalt	Luttinen (2018)	52.05	15.73	0.69	0.889	24.3362	8.32474	0.572803	0.532821	8.02	0.93	43	83	0.0688072	2.92336	1.93023	0.0216279	64.1953	0.186512
Drakensberg (Lesotho)	basalt	Luttinen (2018)	51.48	15.14	0.74	0.919	24.0697	8.0125	0.61431	0.550802	8.92	0.95	33	81	0.076669	3.00402	2.45455	0.0287879	68.0002	0.270303
Drakensberg (Lesotho)	basalt	Luttinen (2018)	50.08	15.37	0.5	0.893	23.4151	8.13422	0.415074	0.535219	9.62	0.85	39	75	0.0510282	2.87859	1.92308	0.0217949	71.3625	0.246667
Drakensberg (Lesotho)	basalt	Luttinen (2018)	52.1	15.45	0.68	0.871	24.3596	8.17656	0.564501	0.522033	8.47	0.83	36	80	0.0690389	2.9792	2.22222	0.0230556	65.2541	0.235278
Drakensberg (Lesotho)	basalt	Luttinen (2018)	51.42	15.26	0.47	0.949	24.0416	8.07601	0.39017	0.568782	9.14	1.02	41	88	0.0483122	2.97692	2.14634	0.024878	64.6343	0.222927
Drakensberg (Lesotho)	basalt	Luttinen (2018)	52.44	15.85	0.61	0.809	24.5185	8.38825	0.506391	0.484873	8.89	0.98	36	72	0.060369	2.92296	2	0.0272222	67.3435	0.246944
Drakensberg (Lesotho)	basalt	Luttinen (2018)	50.73	15.28	0.81	0.901	23.719	8.08659	0.67242	0.540013	12.59	1.38	40	92	0.0831525	2.93313	2.3	0.0345	58.6971	0.31475
Drakensberg (Lesotho)	basalt	Luttinen (2018)	51.33	15.67	0.54	0.974	23.9996	8.29299	0.44828	0.583766	10.14	1.09	34	83	0.0540553	2.89396	2.44118	0.0320588	70.3332	0.298235
Drakensberg (Lesotho)	basalt	Luttinen (2018)	51.95	16.03	0.43	0.894	24.2894	8.48351	0.356964	0.535818	8.85	1.11	40	79	0.0420774	2.86313	1.975	0.02775	67.8251	0.22125
Drakensberg (Lesotho)	basalt	Luttinen (2018)	50.69	15.13	0.53	0.925	23.7003	8.00721	0.439979	0.554398	8.18	0.84	36	78	0.0549478	2.95987	2.16667	0.0233333	71.0766	0.227222
Drakensberg (Lesotho)	basalt	Luttinen (2018)	51.13	15.69	0.62	0.976	23.906	8.30357	0.514692	0.584965	12.41	1.82	35	105	0.0619844	2.87901	3	0.052	55.7109	0.354571
Drakensberg (Lesotho)	basalt	Luttinen (2018)	53.23	15.99	0.71	0.942	24.8879	8.46234	0.589406	0.564587	15.65	2.47	37	105	0.0696504	2.94102	2.83784	0.0667568	53.7702	0.422973
Drakensberg (Lesotho)	basalt	Luttinen (2018)	51.63	15.52	0.59	0.913	24.1398	8.21361	0.489788	0.547206	11.37	1.53	36	96	0.0596313	2.939	2.66667	0.0425	57.0006	0.315833
Drakensberg (Lesotho)	basalt	Luttinen (2018)	52.41	15.09	0.5	0.907	24.5045	7.98604	0.415074	0.543609	9.19	1.2	33	83	0.051975	3.06842	2.51515	0.0363636	65.4951	0.278485
Drakensberg (Lesotho)	basalt	Luttinen (2018)	51.05	12.98	0.46	0.814	23.8686	6.86937	0.381868	0.48787	7.22	1.3	35	74	0.05559	3.47465	2.11429	0.0371429	65.9284	0.206286
Drakensberg (Lesotho)	basalt	Luttinen (2018)	50.41	14.25	0.24	1.364	23.5694	7.54149	0.199236	0.817512	13.89	1.75	43	121	0.0264186	3.1253	2.81395	0.0406977	67.563	0.323023
Drakensberg (Lesotho)	basalt	Luttinen (2018)	51.65	14.42	0.73	1.231	24.1492	7.63146	0.606008	0.737799	12.05	1.51	42	113	0.0794093	3.16442	2.69048	0.0359524	65.2919	0.286905
Drakensberg (Lesotho)	basalt	Luttinen (2018)	53.53	15.66	1.76	1.046	25.0282	8.2877	1.46106	0.626919	16.71	2.25	21	149	0.176293	3.01992	7.09524	0.107143	42.0751	0.795714
Drakensberg (Lesotho)	basalt	Luttinen (2018)	52.62	14.77	0.51	0.969	24.6027	7.81668	0.423376	0.580769	11.39	1.38	29	121	0.0541631	3.14746	4.17241	0.0475862	47.9974	0.392759
Drakensberg (Lesotho)	basalt	Luttinen (2018)	53.35	14.67	0.73	1.032	24.944	7.76376	0.606008	0.618528	11.01	1.59	31	127	0.078056	3.21288	4.09677	0.0512903	48.703	0.355161
Drakensberg (Lesotho)	basalt	Luttinen (2018)	53.21	15.03	0.75	0.997	24.8786	7.95428	0.622611	0.597551	11.43	1.52	29	123	0.0782737	3.12769	4.24138	0.0524138	48.5814	0.394138
Drakensberg (Lesotho)	basalt	Luttinen (2018)	54.4	15.15	1.06	1.104	25.4349	8.01779	0.879958	0.661681	16.25	2.07	26	156	0.109751	3.17231	6	0.0796154	42.4155	0.625
Drakensberg (Lesotho)	basalt	Luttinen (2018)	52.98	13.65	0.92	0.969	24.771	7.22395	0.763737	0.580769	14.4	1.91	32	134	0.105723	3.42901	4.1875	0.0596875	43.341	0.45

## Sheet: Kaapvaal Craton
Supergroup	Rock type	Reference	SiO2 [%]	Al2O3 [%]	K2O [%]	TiO2 [%]	Si [%]	Al [%]	K [%]	Ti [%]	La [ppm]	Th [ppm]	Sc [ppm]	Zr [ppm]	K/Al	Si/Al	Zr/Sc	Th/Sc	Ti/Zr [*10-4]	La/Sc
Pongola Supergroup	metapelite	Jahn and Condie (1995)	59.88	26.99	7.15	0.86	27.9971	14.2838	5.93556	0.51544	38	8.7	19	174	0.415544	1.96006	9.15789	0.457895	29.623	2
Pongola Supergroup	metapelite	Jahn and Condie (1995)	59.18	14.99	3.08	0.6	27.6699	7.93311	2.55686	0.359609	88	6.4	16	160	0.322302	3.48789	10	0.4	22.4756	5.5
Pongola Supergroup	metapelite	Jahn and Condie (1995)	79.36	9.75	2.07	0.62	37.1051	5.15996	1.71841	0.371596	12	9.9	6.7	388	0.333027	7.19096	57.9104	1.47761	9.57723	1.79104
Pongola Supergroup	metapelite	Jahn and Condie (1995)	56.68	22.33	5.73	1.01	26.501	11.8176	4.75675	0.605342	14	8.7	26	188	0.402513	2.24249	7.23077	0.334615	32.1991	0.538462
Pongola Supergroup	metapelite	Jahn and Condie (1995)	66.44	18.31	4.19	1	31.0643	9.69015	3.47832	0.599349	36	6.9	20	277	0.358955	3.20576	13.85	0.345	21.6371	1.8
Pongola Supergroup	metapelite	Jahn and Condie (1995)	57.76	23.88	5.85	1.14	27.0059	12.6379	4.85637	0.683258	31	9.2	28	194	0.384269	2.13689	6.92857	0.328571	35.2195	1.10714
Soutpansberg/Waterberg	metapelite	Jahn and Condie (1995)	62.76	18.55	6.08	0.75	29.3437	9.81716	5.0473	0.449512	66	18	18	201	0.514131	2.98902	11.1667	1	22.3638	3.66667
Soutpansberg/Waterberg	metapelite	Jahn and Condie (1995)	80.72	7.12	1.99	0.93	37.741	3.7681	1.652	0.557395	18	11	9.5	271	0.438416	10.0159	28.5263	1.15789	20.5681	1.89474
Soutpansberg/Waterberg	metapelite	Jahn and Condie (1995)	45.22	37.41	0.17	1.04	21.1428	19.7984	0.141125	0.623323	41	24	20	303	0.00712812	1.0679	15.15	1.2	20.5717	2.05
Ventersdorp Supergroup	metapelite	Jahn and Condie (1995)	58.63	18.45	3.92	0.57	27.4127	9.76424	3.25418	0.341629	48	7.9	25	144	0.333276	2.80746	5.76	0.316	23.7242	1.92
Ventersdorp Supergroup	metapelite	Jahn and Condie (1995)	63.41	16.63	3.48	0.45	29.6476	8.80105	2.88892	0.269707	68	5.9	18	131	0.328247	3.36864	7.27778	0.327778	20.5883	3.77778
Ventersdorp Supergroup	metapelite	Jahn and Condie (1995)	75.59	8.32	1.6	0.19	35.3424	4.40317	1.32824	0.113876	5.6	2.2	9.3	44	0.301655	8.02658	4.73118	0.236559	25.881	0.602151
Witwatersrand Supergroup	metapelite	Jahn and Condie (1995)	54.85	24.89	1.34	0.9	25.6453	13.1725	1.1124	0.539414	68	17	29	334	0.0844488	1.94689	11.5172	0.586207	16.1501	2.34483
Witwatersrand Supergroup	metapelite	Jahn and Condie (1995)	58.5	24.48	4.32	0.92	27.3519	12.9555	3.58624	0.551401	56	10	31	193	0.276813	2.11122	6.22581	0.322581	28.57	1.80645
Witwatersrand Supergroup	metapelite	Jahn and Condie (1995)	62.41	29.44	0.9	0.99	29.18	15.5804	0.747134	0.593355	47	10	25	173	0.0479533	1.87286	6.92	0.4	34.298	1.88
Witwatersrand Supergroup	metapelite	Jahn and Condie (1995)	51.09	18.94	1.7	0.75	23.8873	10.0236	1.41125	0.449512	16	5.1	30	121	0.140794	2.38312	4.03333	0.17	37.1497	0.533333
Witwatersrand Supergroup	metapelite	Jahn and Condie (1995)	58.79	19.95	2.87	0.55	27.4875	10.5581	2.38253	0.329642	23	4.7	12	156	0.225659	2.60346	13	0.391667	21.1309	1.91667
Witwatersrand Supergroup	metapelite	Jahn and Condie (1995)	53.65	19.38	2.73	0.64	25.0843	10.2564	2.26631	0.383583	25	4.9	26	125	0.220965	2.44571	4.80769	0.188462	30.6867	0.961538
Witwatersrand Supergroup	metapelite	Jahn and Condie (1995)	64.65	16.84	1.76	0.78	30.2274	8.91219	1.46106	0.467492	31	5.3	19	144	0.16394	3.39169	7.57895	0.278947	32.4647	1.63158
Witwatersrand Supergroup	metapelite	Jahn and Condie (1995)	58.88	20.51	2.35	0.94	27.5296	10.8544	1.95085	0.563388	30	6	25	171	0.179728	2.53625	6.84	0.24	32.9467	1.2
Witwatersrand Supergroup	metapelite	Jahn and Condie (1995)	59.33	17.51	3.09	0.78	27.74	9.26677	2.56516	0.467492	27	4.3	28	141	0.276813	2.99349	5.03571	0.153571	33.1555	0.964286
Witwatersrand Supergroup	metapelite	Jahn and Condie (1995)	48.45	11.11	1.5	0.38	22.653	5.87971	1.24522	0.227753	15	3.7	11	91	0.211783	3.85274	8.27273	0.336364	25.0278	1.36364
Witwatersrand Supergroup	metapelite	Jahn and Condie (1995)	44.06	8.48	1.3	0.28	20.6004	4.48785	1.07919	0.167818	13	2.9	11	64	0.24047	4.59027	5.81818	0.263636	26.2215	1.18182
Witwatersrand Supergroup	metapelite	Jahn and Condie (1995)	42.09	9.61	1.65	0.31	19.6794	5.08587	1.36975	0.185798	16	4	16	64	0.269324	3.86941	4	0.25	29.031	1
Witwatersrand Supergroup	metapelite	Jahn and Condie (1995)	54.62	12.04	0.42	0.49	25.5378	6.37189	0.348662	0.293681	19	3.5	14	114	0.0547188	4.00788	8.14286	0.25	25.7615	1.35714
Witwatersrand Supergroup	metapelite	Jahn and Condie (1995)	57.84	14.02	1.49	0.53	27.0433	7.41976	1.23692	0.317655	20	7.2	18	141	0.166706	3.64477	7.83333	0.4	22.5287	1.11111
Witwatersrand Supergroup	metapelite	Jahn and Condie (1995)	47.72	7.25	0.16	0.24	22.3117	3.8369	0.132824	0.143844	13	2.6	11	55	0.0346175	5.81503	5	0.236364	26.1534	1.18182
Transvaal Supergroup	metapelite	Jahn and Condie (1995)	59.95	21.71	2.84	0.85	28.0299	11.4895	2.35762	0.509447	57	22	26	239	0.205198	2.4396	9.19231	0.846154	21.3158	2.19231
Transvaal Supergroup	metapelite	Jahn and Condie (1995)	69.44	13.45	2.53	0.62	32.467	7.11811	2.10028	0.371596	26	12	13	200	0.295061	4.56118	15.3846	0.923077	18.5798	2
Transvaal Supergroup	metapelite	Jahn and Condie (1995)	57.84	21.54	3.26	0.77	27.0433	11.3996	2.70628	0.461499	48	17	27	113	0.237403	2.37231	4.18519	0.62963	40.8406	1.77778
Transvaal Supergroup	metapelite	Jahn and Condie (1995)	56.19	12.99	0.69	0.51	26.2719	6.87466	0.572803	0.305668	28	17	20	123	0.0833208	3.82155	6.15	0.85	24.8511	1.4
Transvaal Supergroup	metapelite	Jahn and Condie (1995)	66.72	19.81	0.66	0.8	31.1952	10.484	0.547898	0.479479	39	15	19	322	0.0522605	2.97551	16.9474	0.789474	14.8907	2.05263
Transvaal Supergroup	metapelite	Jahn and Condie (1995)	54.46	24.33	1.82	1	25.463	12.8761	1.51087	0.599349	54	24	34	197	0.117339	1.97754	5.79412	0.705882	30.4238	1.58824
Transvaal Supergroup	metapelite	Jahn and Condie (1995)	71.78	10.56	0.89	0.53	33.561	5.58864	0.738832	0.317655	14	23	8.6	449	0.132203	6.00522	52.2093	2.67442	7.07472	1.62791
Transvaal Supergroup	metapelite	Jahn and Condie (1995)	58.81	20.75	3.99	0.7	27.4969	10.9815	3.31229	0.419544	76	21	19	155	0.301626	2.50393	8.15789	1.10526	27.0674	4
Transvaal Supergroup	metapelite	Jahn and Condie (1995)	59.18	23.93	4.25	0.72	27.6699	12.6644	3.52813	0.431531	64	22	17	172	0.278586	2.18485	10.1176	1.29412	25.089	3.76471
Transvaal Supergroup	metapelite	Jahn and Condie (1995)	61.82	16.99	6.32	0.82	28.9042	8.99157	5.24654	0.491466	22	5.4	20	151	0.583495	3.21459	7.55	0.27	32.5474	1.1
Transvaal Supergroup	metapelite	Jahn and Condie (1995)	48.46	17.96	4.88	0.87	22.6577	9.50492	4.05113	0.521434	35	6.1	31	151	0.426214	2.38378	4.87097	0.196774	34.532	1.12903
Transvaal Supergroup	metapelite	Jahn and Condie (1995)	60.14	20.55	5.88	1	28.1187	10.8756	4.88127	0.599349	31	8.2	27	192	0.448827	2.58548	7.11111	0.303704	31.2161	1.14815
Transvaal Supergroup	metapelite	Jahn and Condie (1995)	68.76	15.13	6.67	0.53	32.149	8.00721	5.53709	0.317655	9.4	4.4	11	140	0.691513	4.01501	12.7273	0.4	22.6896	0.854545
Transvaal Supergroup	metapelite	Jahn and Condie (1995)	50.44	16.54	6.83	2.42	23.5834	8.75342	5.66992	1.45042	28	5.7	35	377	0.647737	2.6942	10.7714	0.162857	38.4728	0.8
Transvaal Supergroup	metapelite	Jahn and Condie (1995)	42.35	14.91	0.02	0.66	19.8009	7.89078	0.016603	0.39557	29	6.4	23	88	0.0021041	2.50937	3.82609	0.278261	44.9512	1.26087
Swaziland Supergroup	metapelite	McLennan et al. (1983)	74.49	3.56	0.5	0.26	34.8281	1.88405	0.415074	0.155831	5.86	1.6	4.7	23	0.22031	18.4858	4.89362	0.340426	67.7525	1.24681
Swaziland Supergroup	metapelite	McLennan et al. (1983)	50.16	17.4	3.37	0.69	23.4525	9.20855	2.7976	0.413551	24.8	5.45	28	127	0.303805	2.54682	4.53571	0.194643	32.5631	0.885714
Swaziland Supergroup	metapelite	McLennan et al. (1983)	58.86	13.05	1.78	0.52	27.5202	6.90641	1.47766	0.311661	16.3	4.21	22	121	0.213955	3.98474	5.5	0.191364	25.7571	0.740909
Swaziland Supergroup	metapelite	McLennan et al. (1983)	58.46	13.46	4.14	0.58	27.3332	7.1234	3.43682	0.347622	19.5	4.62	16	129	0.482469	3.8371	8.0625	0.28875	26.9475	1.21875
Swaziland Supergroup	metapelite	McLennan et al. (1983)	56	10.3	0.72	0.46	26.183	5.45104	0.597707	0.275701	4.6	-	28	34	0.10965	4.80331	1.21429	-	81.0884	0.164286
Swaziland Supergroup	metapelite	McLennan et al. (1983)	63.7	12.3	1.7	0.72	29.7832	6.50949	1.41125	0.431531	17.8	-	21	112	0.216799	4.57535	5.33333	-	38.5296	0.847619
Swaziland Supergroup	metapelite	McLennan et al. (1983)	61.93	11.07	3.59	0.36	28.9556	5.85854	2.98023	0.215766	14.5	5.28	14	115	0.508699	4.94246	8.21429	0.377143	18.7622	1.03571
Swaziland Supergroup	metapelite	McLennan et al. (1983)	59.44	13.3	4.62	0.38	27.7914	7.03872	3.83529	0.227753	16.7	5.18	15	131	0.544884	3.94836	8.73333	0.345333	17.3857	1.11333
Swaziland Supergroup	metapelite	McLennan et al. (1983)	58.12	15.37	4.71	0.55	27.1742	8.13422	3.91	0.329642	34.6	7.08	18	209	0.480685	3.34073	11.6111	0.393333	15.7723	1.92222
Swaziland Supergroup	metapelite	McLennan et al. (1983)	61.59	14.86	5.94	0.47	28.7967	7.86432	4.93108	0.281694	18.4	6.21	15	109	0.62702	3.66169	7.26667	0.414	25.8435	1.22667
Swaziland Supergroup	metapelite	McLennan et al. (1983)	55.53	15.04	5.49	0.43	25.9633	7.95958	4.55752	0.25772	26.7	7.21	15	175	0.572583	3.26189	11.6667	0.480667	14.7269	1.78
Pongola Supergroup	metapelite	McLennan et al. (1983)	59.24	20.73	4.88	0.62	27.6979	10.9709	4.05113	0.371596	28.3	12.3	19	124	0.369262	2.52468	6.52632	0.647368	29.9674	1.48947
Pongola Supergroup	metapelite	McLennan et al. (1983)	58.96	22.84	6.03	1	27.567	12.0875	5.0058	0.599349	30.8	7.7	23	158	0.414128	2.28061	6.86957	0.334783	37.9335	1.33913
Pongola Supergroup	metapelite	McLennan et al. (1983)	58.86	21.89	6.26	0.7	27.5202	11.5848	5.19673	0.419544	37.9	8.29	18	343	0.448582	2.37555	19.0556	0.460556	12.2316	2.10556
Pongola Supergroup	metapelite	McLennan et al. (1983)	64.2	16.33	4.42	0.66	30.017	8.64228	3.66926	0.39557	16.2	5.95	12	229	0.424571	3.47327	19.0833	0.495833	17.2738	1.35
Witwatersrand Supergroup	shale	Wronkiewicz and Condie (1987)	53.53	27.68	5.07	1.19	25.0282	14.649	4.20885	0.713225	84	14	48	239	0.287313	1.70852	4.97917	0.291667	29.8421	1.75
Witwatersrand Supergroup	shale	Wronkiewicz and Condie (1987)	57.84	14.02	1.49	0.53	27.0433	7.41976	1.23692	0.317655	20	7.2	18	141	0.166706	3.64477	7.83333	0.4	22.5287	1.11111
Witwatersrand Supergroup	shale	Wronkiewicz and Condie (1987)	47.72	7.25	0.16	0.24	22.3117	3.8369	0.132824	0.143844	13	2.6	11	55	0.0346175	5.81503	5	0.236364	26.1534	1.18182
Witwatersrand Supergroup	shale	Wronkiewicz and Condie (1987)	65.32	11.71	0.86	0.47	30.5406	6.19725	0.713928	0.281694	15	3.2	12	106	0.115201	4.92809	8.83333	0.266667	26.5749	1.25
Witwatersrand Supergroup	shale	Wronkiewicz and Condie (1987)	40.98	7.85	1.36	0.27	19.1604	4.15443	1.129	0.161824	12	2.9	10	54	0.271758	4.61203	5.4	0.29	29.9674	1.2
Witwatersrand Supergroup	shale	Wronkiewicz and Condie (1987)	48.45	11.11	1.5	0.38	22.653	5.87971	1.24522	0.227753	15	3.7	11	91	0.211783	3.85274	8.27273	0.336364	25.0278	1.36364
Witwatersrand Supergroup	shale	Wronkiewicz and Condie (1987)	44.06	8.48	1.3	0.28	20.6004	4.48785	1.07919	0.167818	13	2.9	11	64	0.24047	4.59027	5.81818	0.263636	26.2215	1.18182
Witwatersrand Supergroup	shale	Wronkiewicz and Condie (1987)	42.09	9.61	1.65	0.31	19.6794	5.08587	1.36975	0.185798	16	4	16	64	0.269324	3.86941	4	0.25	29.031	1
Witwatersrand Supergroup	shale	Wronkiewicz and Condie (1987)	55.32	12.77	0.02	0.53	25.8651	6.75823	0.016603	0.317655	25	4.2	24	115	0.0024567	3.8272	4.79167	0.175	27.6222	1.04167
Witwatersrand Supergroup	shale	Wronkiewicz and Condie (1987)	53.92	13.98	0.67	0.6	25.2105	7.3986	0.5562	0.359609	23	4.8	19	146	0.0751764	3.40747	7.68421	0.252632	24.6308	1.21053
Witwatersrand Supergroup	shale	Wronkiewicz and Condie (1987)	59.33	17.51	3.09	0.78	27.74	9.26677	2.56516	0.467492	27	4.3	28	141	0.276813	2.99349	5.03571	0.153571	33.1555	0.964286
Witwatersrand Supergroup	shale	Wronkiewicz and Condie (1987)	58.82	19.97	2.38	0.9	27.5015	10.5687	1.97575	0.539414	38	5.5	24	143	0.186944	2.60218	5.95833	0.229167	37.7213	1.58333
Witwatersrand Supergroup	shale	Wronkiewicz and Condie (1987)	57.79	20.78	2.28	0.97	27.02	10.9973	1.89274	0.581368	36	6.1	27	169	0.172109	2.45695	6.25926	0.225926	34.4005	1.33333
Witwatersrand Supergroup	shale	Wronkiewicz and Condie (1987)	55.75	19.44	3.62	0.62	26.0661	10.2882	3.00514	0.371596	32	6	21	132	0.292096	2.5336	6.28571	0.285714	28.1512	1.52381
Witwatersrand Supergroup	shale	Wronkiewicz and Condie (1987)	54.01	15.67	1.05	0.5	25.2526	8.29299	0.871656	0.299674	18	3.9	27	94	0.105108	3.04505	3.48148	0.144444	31.8803	0.666667
Witwatersrand Supergroup	shale	Wronkiewicz and Condie (1987)	52.45	18.39	1.35	0.64	24.5232	9.73249	1.1207	0.383583	24	4.2	25	103	0.11515	2.51973	4.12	0.168	37.2411	0.96
Witwatersrand Supergroup	shale	Wronkiewicz and Condie (1987)	53.64	15.84	0.74	0.61	25.0796	8.38296	0.61431	0.365603	17	3.1	27	97	0.0732808	2.99174	3.59259	0.114815	37.691	0.62963
Witwatersrand Supergroup	shale	Wronkiewicz and Condie (1987)	52.4	18.82	2.48	0.6	24.4998	9.96005	2.05877	0.359609	23	4.6	26	101	0.206703	2.45981	3.88462	0.176923	35.6049	0.884615
Witwatersrand Supergroup	shale	Wronkiewicz and Condie (1987)	64.26	19.58	1.77	0.74	30.045	10.3623	1.46936	0.443518	49	8.9	22	212	0.141799	2.89946	9.63636	0.404545	20.9207	2.22727
Witwatersrand Supergroup	shale	Wronkiewicz and Condie (1987)	62.31	27.15	2.76	0.92	29.1333	14.3685	2.29121	0.551401	65	11	30	158	0.15946	2.02758	5.26667	0.366667	34.8988	2.16667
Witwatersrand Supergroup	shale	Wronkiewicz and Condie (1987)	59.36	26.1	0.94	0.97	27.754	13.8128	0.78034	0.581368	53	11	27	181	0.0564938	2.00929	6.7037	0.407407	32.1198	1.96296
Witwatersrand Supergroup	shale	Wronkiewicz and Condie (1987)	63.13	23.64	4.82	0.9	29.5167	12.5109	4.00132	0.539414	47	9.4	25	203	0.319826	2.35927	8.12	0.376	26.5721	1.88
Witwatersrand Supergroup	shale	Wronkiewicz and Condie (1987)	64.22	28.09	0.61	0.78	30.0263	14.866	0.506391	0.467492	66	12	19	211	0.0340637	2.0198	11.1053	0.631579	22.156	3.47368
Ventersdorp Supergroup	shale average (n=4)	Wronkiewicz and Condie (1990)	63.64	15.54	3.27	0.44	29.7551	8.22419	2.71459	0.263714	38	6.2	18	124	0.330073	3.618	6.88889	0.344444	21.2672	2.11111
Transvaal Supergroup	shale average (n=7)	Wronkiewicz and Condie (1990)	59.86	14.93	4.89	0.89	27.9878	7.90136	4.05943	0.533421	19	5.7	18	178	0.513763	3.54215	9.88889	0.316667	29.9674	1.05556
Transvaal Supergroup	shale average (n=16)	Wronkiewicz and Condie (1990)	53.84	18.44	4.54	0.89	25.1731	9.75895	3.76887	0.533421	29	5.6	24	157	0.386197	2.57949	6.54167	0.233333	33.9758	1.20833
Transvaal Supergroup	shale average (n=46)	Wronkiewicz and Condie (1990)	59.36	20.75	3.52	0.7	27.754	10.9815	2.92212	0.419544	56	22	18	170	0.266096	2.52735	9.44444	1.22222	24.6791	3.11111
Transvaal Supergroup	shale average (n=5)	Wronkiewicz and Condie (1990)	57.89	21.17	1.43	0.85	27.0667	11.2037	1.18711	0.509447	49	20	24	234	0.105957	2.41586	9.75	0.833333	21.7712	2.04167
Transvaal Supergroup	shale average (n=24)	Wronkiewicz and Condie (1990)	61.18	18.51	2.91	0.75	28.605	9.79599	2.41573	0.449512	36	16	23	150	0.246604	2.92007	6.52174	0.695652	29.9674	1.56522
Pongola Supergroup	shale average (n=9)	Wronkiewicz (1989)	59.53	16.47	1.51	0.75	27.8335	8.71637	1.25352	0.449512	64	11	19	208	0.143813	3.19324	10.9474	0.578947	21.6111	3.36842
Pongola Supergroup	shale average (n=18)	Wronkiewicz (1989)	57.43	19.32	5.33	0.08	26.8516	10.2247	4.42469	0.0479479	38	8.6	19	256	0.432747	2.62616	13.4737	0.452632	1.87297	2
Pongola Supergroup	shale average (n=6)	Wronkiewicz (1989)	64.27	15.61	4.83	0.57	30.0497	8.26124	4.00962	0.341629	20	7.2	13	145	0.485353	3.63743	11.1538	0.553846	23.5606	1.53846
Pongola Supergroup	shale average (n=11)	Wronkiewicz (1989)	58.75	20.62	4.7	0.76	27.4688	10.9127	3.9017	0.455505	47	13	24	144	0.357539	2.51715	6	0.541667	31.6323	1.95833
Pongola Supergroup	shale average (n=16)	Wronkiewicz (1989)	56.23	24.45	5.98	1.19	26.2906	12.9396	4.96429	0.713225	43	10	27	149	0.383651	2.03179	5.51852	0.37037	47.8675	1.59259
Pongola Supergroup	shale average (n=9)	Wronkiewicz (1989)	70.71	13.56	3.24	0.46	33.0607	7.17632	2.68968	0.275701	27	5.2	8	74	0.3748	4.60692	9.25	0.65	37.2568	3.375

## Sheet: modern river sediments
River	Rock type	Reference	SiO2 [%]	Al2O3 [%]	K2O [%]	TiO2 [%]	Si [%]	Al [%]	K [%]	Ti [%]	La [ppm]	Th [ppm]	Sc [ppm]	Zr [ppm]	K/Al	Si/Al	Zr/Sc	Th/Sc	Ti/Zr [*10-4]	La/Sc
Pienaars River (draining Transvaal and Karoo)	river mud	Garzanti et al. (2014)	55.64	14.62	1.4	1.03	26.0147	7.7373	1.16221	0.617329	56.1	15.2	21	328.4	0.150208	3.36225	15.6381	0.72381	18.7981	2.67143
Serobaneng River (draining Transvaal)	river mud	Garzanti et al. (2014)	44.55	19.74	1.52	0.83	20.8295	10.4469	1.26183	0.49746	56.1	14.9	19	106.3	0.120784	1.99384	5.59474	0.784211	46.7977	2.95263
Olifants River (draining Bushveld Cpx)	river mud	Garzanti et al. (2014)	48.44	13.57	1.3	0.67	22.6483	7.18161	1.07919	0.401564	30.3	9.9	21	203.2	0.150272	3.15365	9.67619	0.471429	19.762	1.44286
Diep River (draining Kaapvaal)	river mud	Garzanti et al. (2014)	48.93	16.46	1.43	0.72	22.8774	8.71108	1.18711	0.431531	26.8	7.5	16	124.1	0.136276	2.62624	7.75625	0.46875	34.7729	1.675

## Sheet: references
Andersson, P., Worden, R., Hodgson, D., and Flint, S.: Provenance evolution and chemostratigraphy of a Palaeozoic submarine fan-complex: Tanqua Karoo Basin, South Africa, Marine and Petroleum Geology, 21, 555-577, https://doi.org/10.1016/j.marpetgeo.2004.01.004, 2004.
Fourie, P. H., Zimmermann, U., Beukes, N. J., Naidoo, T., Kobayashi, K., Kosler, J., Nakamura, E., Tait, J., and Theron, J. N.: Provenance and reconnaissance study of detrital zircons of the Palaeozoic Cape Supergroup in South Africa: revealing the interaction of the Kalahari and Río de la Plata cratons, International Journal of Earth Sciences, 100, 527-541, https://doi.org/10.1007/s00531-010-061…
Galerne, C. Y., Neumann, E.-R., and Planke, S.: Emplacement mechanisms of sill complexes: Information from the geochemical architecture of the Golden Valley Sill Complex, South Africa, Journal of Volcanology and Geothermal Research, 177, 425-440, https://doi.org/10.1016/j.jvolgeores.2008.06.004, 2008.
Garzanti, E., Padoan, M., Setti, M., López-Galindo, A., and Villa, I. M.: Provenance versus weathering control on the composition of tropical river mud (southern Africa), Chemical Geology, 366, 61-74, https://doi.org/10.1016/j.chemgeo.2013.12.016, 2014.
Jahn, B.-M., and Condie, K. C.: Evolution of the Kaapvaal Craton as viewed from geochemical and Sm–Nd isotopic analyses of intracratonic pelites, Geochim Cosmochim Ac, 59, 2239-2258, https://doi.org/10.1016/0016-7037(95)00103-7, 1995.
Luttinen, A. V.: Bilateral geochemical asymmetry in the Karoo large igneous province, Scientific reports, 8, 1-11, https://doi.org/10.1038/s41598-018-23661-3, 2018.
McLennan, S. M., Taylor, S., and Kröner, A.: Geochemical evolution of Archean shales from South Africa. I. The Swaziland and Pongola Supergroups, Precambrian Research, 22, 93-124, https://doi.org/10.1016/0301-9268(83)90060-8, 1983.
Neumann, E.-R., Svensen, H., Galerne, C. Y., and Planke, S.: Multistage evolution of dolerites in the Karoo large igneous province, Central South Africa, Journal of Petrology, 52, 959-984, https://doi.org/10.1093/petrology/egr011, 2011.
Wronkiewicz, D. J., and Condie, K. C.: Geochemistry of Archean shales from the Witwatersrand Supergroup, South Africa: source-area weathering and provenance, Geochim Cosmochim Ac, 51, 2401-2416, https://doi.org/10.1016/0016-7037(87)90293-6, 1987.
Wronkiewicz, D. J.: Geochemistry and provenance of sediments from the Pongola Supergroup, South Africa: evidence for a 3.0-Ga-old continental craton, Geochim Cosmochim Ac, 53, 1537-1549, https://doi.org/10.1016/0016-7037(89)90236-6, 1989.
Wronkiewicz, D. J., and Condie, K. C.: Geochemistry and mineralogy of sediments from the Ventersdorp and Transvaal Supergroups, South Africa: cratonic evolution during the early Proterozoic, Geochim Cosmochim Ac, 54, 343-354, https://doi.org/10.1016/0016-7037(90)90323-d, 1990.
