# Supplementary material for: Driving mechanisms of organic carbon burial in the Early CretaceousSouth Atlantic Cape Basin (DSDP Site 361)
Source: Copernicus journal article supplement (doi:10.5194/cp-2020-15), 2020-03-04
Supplement: Supplementary file 2 [file cp_2020-15_Dummann_et_al_S2.xlsx]

## Sheet: Karoo Supergroup
Group	Rock type	Reference	concentration [ppm]	La	Ce	Pr	Nd	Sm	Eu	Gd	Tb	Dy	Ho	Er	Tm	Yb	Lu	chondrite normalization	LaN	CeN	PrN	NdN	SmN	EuN	GdN	TbN	DyN	HoN	ErN	TmN	YbN	LuN
Ecca	mudstone	Andersson et al. (2004)		35.6	80.6	8.88	35.5	8.1	1.6	6.98	1.15	6.75	1.37	4.17	0.66	3.84	0.62	McLennan et al. (1980)	97.0027	84.2215	64.8175	49.9297	35.0649	18.3908	22.8105	19.8276	17.7165	16.1176	16.747	18.3333	15.4839	16.3158
Ecca	mudstone	Andersson et al. (2004)		53.5	105.6	11.76	45.1	9.6	1.9	8.11	1.28	7.66	1.53	4.62	0.68	4.68	0.74		145.777	110.345	85.8394	63.4318	41.5584	21.8391	26.5033	22.069	20.105	18	18.5542	18.8889	18.871	19.4737
Ecca	mudstone	Andersson et al. (2004)		57.5	112.5	12.5	46.9	9.7	1.9	8.47	1.4	8.16	1.66	4.92	0.75	4.82	0.78		156.676	117.555	91.2409	65.9634	41.9913	21.8391	27.6797	24.1379	21.4173	19.5294	19.759	20.8333	19.4355	20.5263
Ecca	mudstone	Andersson et al. (2004)		60.9	120.2	13.43	50.3	10.4	2.1	7.91	1.34	7.96	1.62	4.72	0.72	4.61	0.68		165.94	125.601	98.0292	70.7454	45.0216	24.1379	25.8497	23.1034	20.8924	19.0588	18.9558	20	18.5887	17.8947
Ecca	mudstone	Andersson et al. (2004)		50	98.2	11.17	43.4	9.3	1.8	8.29	1.29	7.94	1.54	4.57	0.72	4.66	0.69		136.24	102.612	81.5328	61.0408	40.2597	20.6897	27.0915	22.2414	20.8399	18.1176	18.3534	20	18.7903	18.1579
Ecca	mudstone	Andersson et al. (2004)		54.5	110.1	12.4	47.8	10.2	1.9	8.51	1.34	8.49	1.71	4.88	0.71	4.74	0.74		148.501	115.047	90.5109	67.2293	44.1558	21.8391	27.8105	23.1034	22.2835	20.1176	19.5984	19.7222	19.1129	19.4737
Ecca	mudstone	Andersson et al. (2004)		65.8	132.1	14.72	55.3	11.6	2.1	9.33	1.64	9.35	1.98	5.64	0.87	5.64	0.96		179.292	138.036	107.445	77.7778	50.2165	24.1379	30.4902	28.2759	24.5407	23.2941	22.6506	24.1667	22.7419	25.2632
Ecca	mudstone	Andersson et al. (2004)		41	81.2	8.87	34.8	6.6	1.1	5.52	0.89	5.35	1.08	3.14	0.5	3.17	0.52		111.717	84.8485	64.7445	48.9451	28.5714	12.6437	18.0392	15.3448	14.042	12.7059	12.6104	13.8889	12.7823	13.6842
Ecca	mudstone	Andersson et al. (2004)		45.5	92.6	9.78	37.1	7.3	1.2	6.27	1.05	6.74	1.29	3.93	0.59	4.09	0.65		123.978	96.7607	71.3869	52.18	31.6017	13.7931	20.4902	18.1034	17.6903	15.1765	15.7831	16.3889	16.4919	17.1053
Ecca	mudstone	Andersson et al. (2004)		39.3	80.5	8.84	33.3	7	1.2	6.22	1.01	6.01	1.18	3.74	0.57	3.45	0.6		107.084	84.117	64.5255	46.8354	30.303	13.7931	20.3268	17.4138	15.7743	13.8824	15.0201	15.8333	13.9113	15.7895
Ecca	mudstone	Andersson et al. (2004)		35.3	71.1	8.03	31.2	6.7	1.2	5.64	0.98	5.77	1.22	3.32	0.54	3.49	0.58		96.1853	74.2947	58.6131	43.8819	29.0043	13.7931	18.4314	16.8966	15.1444	14.3529	13.3333	15	14.0726	15.2632
Ecca	mudstone	Andersson et al. (2004)		42.1	83.3	9.46	36.9	7.7	1.3	6.38	1.07	6.33	1.37	3.71	0.59	3.99	0.6		114.714	87.0428	69.0511	51.8987	33.3333	14.9425	20.8497	18.4483	16.6142	16.1176	14.8996	16.3889	16.0887	15.7895
Ecca	mudstone	Andersson et al. (2004)		40.1	83.3	9.77	39	8.8	1.6	8.13	1.26	7.46	1.5	4.05	0.69	4	0.58		109.264	87.0428	71.3139	54.8523	38.0952	18.3908	26.5686	21.7241	19.5801	17.6471	16.2651	19.1667	16.129	15.2632
Ecca	mudstone	Andersson et al. (2004)		48.3	95.3	10.47	39.5	7.5	1.4	5.56	1.05	6.08	1.22	3.53	0.56	3.57	0.56		131.608	99.582	76.4234	55.5556	32.4675	16.092	18.1699	18.1034	15.958	14.3529	14.1767	15.5556	14.3952	14.7368
Ecca	mudstone	Andersson et al. (2004)		31.1	61.7	6.67	24.9	5.1	0.8	4.04	0.86	3.74	0.84	2.6	0.43	2.75	0.47		84.7411	64.4723	48.6861	35.0211	22.0779	9.1954	13.2026	14.8276	9.81627	9.88235	10.4418	11.9444	11.0887	12.3684
Ecca	mudstone	Andersson et al. (2004)		57.9	112.6	12.35	44.8	9	1.5	6.45	1.09	6.4	1.28	3.9	0.6	3.93	0.6		157.766	117.659	90.146	63.0098	38.961	17.2414	21.0784	18.7931	16.7979	15.0588	15.6627	16.6667	15.8468	15.7895
Ecca	mudstone	Andersson et al. (2004)		56.7	112.8	12.48	45.2	8.8	1.5	6.83	1.16	6.81	1.44	4.11	0.65	4.15	0.62		154.496	117.868	91.0949	63.5724	38.0952	17.2414	22.3203	20	17.874	16.9412	16.506	18.0556	16.7339	16.3158
Ecca	mudstone	Andersson et al. (2004)		46	92.1	10.19	38.2	7.7	1.2	6.1	1.04	5.89	1.2	3.54	0.53	3.58	0.56		125.341	96.2382	74.3796	53.7271	33.3333	13.7931	19.9346	17.931	15.4593	14.1176	14.2169	14.7222	14.4355	14.7368
Ecca	mudstone	Andersson et al. (2004)		47.3	97	10.84	41.5	7.9	1.4	6.5	1.08	6.51	1.31	3.96	0.61	4.08	0.66		128.883	101.358	79.1241	58.3685	34.1991	16.092	21.2418	18.6207	17.0866	15.4118	15.9036	16.9444	16.4516	17.3684
Ecca	mudstone	Andersson et al. (2004)		45.1	90.9	10.39	37.9	7.8	1.5	6.84	1.09	6.56	1.33	3.77	0.64	4.16	0.65		122.888	94.9843	75.8394	53.3052	33.7662	17.2414	22.3529	18.7931	17.2178	15.6471	15.1406	17.7778	16.7742	17.1053
Ecca	mudstone	Andersson et al. (2004)		49.9	99.7	10.71	39.7	7.7	1.4	5.91	0.94	5.87	1.18	3.4	0.58	3.6	0.6		135.967	104.18	78.1752	55.8368	33.3333	16.092	19.3137	16.2069	15.4068	13.8824	13.6546	16.1111	14.5161	15.7895
Ecca	mudstone	Andersson et al. (2004)		48.5	96.9	10.58	38.9	7.5	1.3	5.86	0.97	5.66	1.2	3.31	0.58	3.33	0.53		132.153	101.254	77.2263	54.7117	32.4675	14.9425	19.1503	16.7241	14.8556	14.1176	13.2932	16.1111	13.4274	13.9474
Ecca	mudstone	Andersson et al. (2004)		42.2	84.3	9.3	34.9	7.1	1.3	6.11	0.91	5.8	1.16	3.2	0.51	3.5	0.53		114.986	88.0878	67.8832	49.0858	30.7359	14.9425	19.9673	15.6897	15.2231	13.6471	12.8514	14.1667	14.1129	13.9474
Ecca	mudstone	Andersson et al. (2004)		41.9	82.7	9.25	35.4	7.4	1.3	5.93	0.98	6.12	1.29	3.63	0.56	3.88	0.62		114.169	86.4159	67.5182	49.789	32.0346	14.9425	19.3791	16.8966	16.063	15.1765	14.5783	15.5556	15.6452	16.3158
Ecca	mudstone	Andersson et al. (2004)		43.1	85.1	9.16	35.4	7.2	1.2	5.83	0.98	5.62	1.11	3.28	0.55	3.53	0.51		117.439	88.9237	66.8613	49.789	31.1688	13.7931	19.0523	16.8966	14.7507	13.0588	13.1727	15.2778	14.2339	13.4211
Ecca	mudstone	Andersson et al. (2004)		43.3	85.8	9.5	36.5	7.6	1.3	6.09	0.99	5.83	1.23	3.27	0.57	3.57	0.55		117.984	89.6552	69.3431	51.3361	32.9004	14.9425	19.902	17.069	15.3018	14.4706	13.1325	15.8333	14.3952	14.4737
Ecca	mudstone	Andersson et al. (2004)		45.6	91.1	9.8	36.6	7.5	1.2	5.96	1.05	5.96	1.23	3.65	0.61	4.18	0.67		124.251	95.1933	71.5328	51.4768	32.4675	13.7931	19.4771	18.1034	15.643	14.4706	14.6586	16.9444	16.8548	17.6316
Ecca	mudstone	Andersson et al. (2004)		46.4	90.2	9.97	35.8	7.1	1.2	5.37	0.94	5.68	1.15	3.36	0.58	3.52	0.59		126.431	94.2529	72.7737	50.3516	30.7359	13.7931	17.549	16.2069	14.9081	13.5294	13.494	16.1111	14.1935	15.5263
Ecca	mudstone	Andersson et al. (2004)		46.5	91.8	10.1	38.9	8	1.4	6.44	1.07	6.59	1.28	3.42	0.56	3.7	0.58		126.703	95.9248	73.7226	54.7117	34.632	16.092	21.0458	18.4483	17.2966	15.0588	13.7349	15.5556	14.9194	15.2632
Ecca	mudstone	Andersson et al. (2004)		46.6	91.6	9.82	35	6.7	1.2	5.4	0.91	5.6	1.13	3.14	0.53	3.63	0.59		126.975	95.7158	71.6788	49.2264	29.0043	13.7931	17.6471	15.6897	14.6982	13.2941	12.6104	14.7222	14.6371	15.5263
Ecca	mudstone	Andersson et al. (2004)		40.5	79.8	9.02	34.8	7.1	1.3	6.23	1.06	6.6	1.25	3.46	0.57	3.65	0.58		110.354	83.3856	65.8394	48.9451	30.7359	14.9425	20.3595	18.2759	17.3228	14.7059	13.8956	15.8333	14.7177	15.2632
Ecca	mudstone	Andersson et al. (2004)		42.6	89	9.07	35.4	7.4	1.3	5.79	1.1	5.54	1.18	3.6	0.59	3.78	0.71		116.076	92.999	66.2044	49.789	32.0346	14.9425	18.9216	18.9655	14.5407	13.8824	14.4578	16.3889	15.2419	18.6842
Ecca	mudstone	Andersson et al. (2004)		39.9	82.8	8.92	35.1	7.3	1.2	5.66	0.96	5.65	1.27	3.68	0.59	3.7	0.59		108.719	86.5204	65.1095	49.3671	31.6017	13.7931	18.4967	16.5517	14.8294	14.9412	14.7791	16.3889	14.9194	15.5263
Ecca	mudstone	Andersson et al. (2004)		48.9	101.2	10.55	41.7	8.4	1.4	6.37	1.08	5.84	1.3	3.82	0.63	3.77	0.64		133.243	105.747	77.0073	58.6498	36.3636	16.092	20.817	18.6207	15.3281	15.2941	15.3414	17.5	15.2016	16.8421
Ecca	mudstone	Andersson et al. (2004)		49	101	10.63	42.8	8.2	1.4	6.33	1.07	5.85	1.29	3.79	0.63	3.92	0.59		133.515	105.538	77.5912	60.1969	35.4978	16.092	20.6863	18.4483	15.3543	15.1765	15.2209	17.5	15.8065	15.5263
Ecca	mudstone	Andersson et al. (2004)		42.7	84	8.84	35	7.2	1.1	5.48	0.96	5.4	1.2	3.66	0.52	3.53	0.61		116.349	87.7743	64.5255	49.2264	31.1688	12.6437	17.9085	16.5517	14.1732	14.1176	14.6988	14.4444	14.2339	16.0526
Ecca	mudstone	Andersson et al. (2004)		43.9	91.8	9.92	40.8	8.4	1.5	7.32	1.24	7.15	1.56	4.42	0.73	4.47	0.64		119.619	95.9248	72.4088	57.384	36.3636	17.2414	23.9216	21.3793	18.7664	18.3529	17.751	20.2778	18.0242	16.8421
Ecca	mudstone	Andersson et al. (2004)		54.2	109.6	11.4	44.5	8.4	1.5	5.77	1.02	6.05	1.21	3.59	0.58	3.85	0.66		147.684	114.525	83.2117	62.5879	36.3636	17.2414	18.8562	17.5862	15.8793	14.2353	14.4177	16.1111	15.5242	17.3684
Ecca	mudstone	Andersson et al. (2004)		31.4	66.1	6.66	26.2	5.1	0.7	3.43	0.61	3.37	0.83	2.45	0.37	2.67	0.48		85.5586	69.07	48.6131	36.8495	22.0779	8.04598	11.2092	10.5172	8.84514	9.76471	9.83936	10.2778	10.7661	12.6316
Ecca	mudstone	Andersson et al. (2004)		34.4	71.6	7.59	30.7	6.2	1	5.21	0.87	5.03	1.16	3.53	0.59	3.61	0.63		93.733	74.8171	55.4015	43.1786	26.8398	11.4943	17.0261	15	13.2021	13.6471	14.1767	16.3889	14.5565	16.5789
Ecca	mudstone	Andersson et al. (2004)		46.5	94.2	9.86	39.8	7.4	1.3	6.06	0.96	5.55	1.25	3.68	0.59	3.61	0.68		126.703	98.4326	71.9708	55.9775	32.0346	14.9425	19.8039	16.5517	14.5669	14.7059	14.7791	16.3889	14.5565	17.8947
Ecca	mudstone	Andersson et al. (2004)		46.2	94.4	9.94	39.1	6.9	1.1	4.87	0.91	4.88	1.11	3.31	0.56	3.34	0.58		125.886	98.6416	72.5547	54.993	29.8701	12.6437	15.915	15.6897	12.8084	13.0588	13.2932	15.5556	13.4677	15.2632
Ecca	mudstone	Andersson et al. (2004)		36.9	77.5	8.11	32.3	6	1	4.87	0.76	4.33	0.97	2.95	0.52	2.76	0.58		100.545	80.9822	59.1971	45.429	25.974	11.4943	15.915	13.1034	11.3648	11.4118	11.8474	14.4444	11.129	15.2632
Ecca	mudstone	Andersson et al. (2004)		42.7	90.5	9.29	37.5	7.5	1.1	6.12	0.89	5.11	1.12	3.46	0.49	3.16	0.55		116.349	94.5664	67.8102	52.7426	32.4675	12.6437	20	15.3448	13.4121	13.1765	13.8956	13.6111	12.7419	14.4737
Ecca	mudstone	Andersson et al. (2004)		43.8	89.9	9.41	37.4	6.7	1.2	5.75	0.97	5.2	1.09	3.19	0.54	2.9	0.49		119.346	93.9394	68.6861	52.602	29.0043	13.7931	18.7908	16.7241	13.6483	12.8235	12.8112	15	11.6935	12.8947
Ecca	mudstone	Andersson et al. (2004)		46.8	95.9	8.87	41.5	8.3	1.3	5.83	0.95	5.41	1.14	3.28	0.5	3.27	0.54		127.52	100.209	64.7445	58.3685	35.9307	14.9425	19.0523	16.3793	14.1995	13.4118	13.1727	13.8889	13.1855	14.2105
Ecca	mudstone	Andersson et al. (2004)		37.2	75.4	7.95	34.7	7.2	1.1	6.4	1.25	7.94	1.71	5.23	0.87	4.62	0.74		101.362	78.7879	58.0292	48.8045	31.1688	12.6437	20.915	21.5517	20.8399	20.1176	21.004	24.1667	18.629	19.4737
Ecca	mudstone	Andersson et al. (2004)		34.9	72.2	7.69	30	6	0.8	5.09	0.84	5.08	1.19	3.58	0.57	3.51	0.6		95.0954	75.4441	56.1314	42.1941	25.974	9.1954	16.634	14.4828	13.3333	14	14.3775	15.8333	14.1532	15.7895
Ecca	mudstone	Andersson et al. (2004)		40	81.3	8.79	33.5	6.3	1.1	5.09	0.87	4.48	0.98	2.94	0.44	3.02	0.47		108.992	84.953	64.1606	47.1167	27.2727	12.6437	16.634	15	11.7585	11.5294	11.8072	12.2222	12.1774	12.3684
Ecca	mudstone	Andersson et al. (2004)		40.2	81.5	8.63	34.7	6.9	1	5.08	0.88	4.94	1.08	3.21	0.53	3.14	0.51		109.537	85.162	62.9927	48.8045	29.8701	11.4943	16.6013	15.1724	12.9659	12.7059	12.8916	14.7222	12.6613	13.4211
Ecca	mudstone	Andersson et al. (2004)		48.5	99.7	10.74	36.1	10.3	1.8	9.42	1.51	8.38	1.76	4.85	0.75	3.82	0.6		132.153	104.18	78.3942	50.7736	44.5887	20.6897	30.7843	26.0345	21.9948	20.7059	19.4779	20.8333	15.4032	15.7895
Ecca	mudstone	Andersson et al. (2004)		41.1	93.6	8.81	33.7	7.5	1.1	5.05	0.86	4.97	1.06	3.02	0.46	3.03	0.51		111.989	97.8056	64.3066	47.398	32.4675	12.6437	16.5033	14.8276	13.0446	12.4706	12.1285	12.7778	12.2177	13.4211
Ecca	mudstone	Andersson et al. (2004)		54.5	110.3	11.62	48.9	10.6	1.9	8.43	1.28	6.05	1.27	3.51	0.56	3.27	0.52		148.501	115.256	84.8175	68.7764	45.8874	21.8391	27.549	22.069	15.8793	14.9412	14.0964	15.5556	13.1855	13.6842
Ecca	mudstone	Andersson et al. (2004)		35.3	73.8	7.69	31.7	6.2	1	5.48	1.1	6.14	1.39	3.94	0.63	3.76	0.6		96.1853	77.116	56.1314	44.5851	26.8398	11.4943	17.9085	18.9655	16.1155	16.3529	15.8233	17.5	15.1613	15.7895
Ecca	mudstone	Andersson et al. (2004)		24.6	50.2	5.29	20.7	4.3	0.7	3.48	0.61	3.93	0.87	2.81	0.46	2.69	0.45		67.03	52.4556	38.6131	29.1139	18.6147	8.04598	11.3725	10.5172	10.315	10.2353	11.2851	12.7778	10.8468	11.8421
Ecca	mudstone	Andersson et al. (2004)		37.3	75.9	8.23	32.7	7.1	1.1	5.52	0.89	5.31	1.11	3.23	0.52	3.14	0.51		101.635	79.3103	60.073	45.9916	30.7359	12.6437	18.0392	15.3448	13.937	13.0588	12.9719	14.4444	12.6613	13.4211
Ecca	mudstone	Andersson et al. (2004)		37.6	78.1	8.15	31.5	5.6	1	4.41	0.79	5.05	1.02	3.06	0.49	3.04	0.42		102.452	81.6092	59.4891	44.3038	24.2424	11.4943	14.4118	13.6207	13.2546	12	12.2892	13.6111	12.2581	11.0526
Ecca	mudstone	Andersson et al. (2004)		24.8	49.8	4.95	20.3	4	0.8	2.97	0.51	3.47	0.77	2.58	0.41	2.46	0.46		67.5749	52.0376	36.1314	28.5513	17.316	9.1954	9.70588	8.7931	9.10761	9.05882	10.3614	11.3889	9.91935	12.1053
Ecca	mudstone	Andersson et al. (2004)		34.7	70	7.29	29.2	5.6	1	3.91	0.67	3.77	0.85	2.33	0.38	2.38	0.39		94.5504	73.1452	53.2117	41.0689	24.2424	11.4943	12.7778	11.5517	9.89501	10	9.35743	10.5556	9.59677	10.2632
Ecca	mudstone	Andersson et al. (2004)		41.5	83.4	8.88	35.6	7.6	1.1	5.46	0.96	5.67	1.2	3.89	0.61	3.45	0.56		113.079	87.1473	64.8175	50.0703	32.9004	12.6437	17.8431	16.5517	14.8819	14.1176	15.6225	16.9444	13.9113	14.7368
Ecca	mudstone	Andersson et al. (2004)		52.2	105.8	10.77	43.3	8.6	1.6	5.87	0.98	4.8	1.1	3.41	0.52	3.55	0.61		142.234	110.554	78.6131	60.9001	37.2294	18.3908	19.183	16.8966	12.5984	12.9412	13.6948	14.4444	14.3145	16.0526
Ecca	mudstone	Andersson et al. (2004)		108.8	212.9	23.04	99.3	21.6	4.7	21.79	3.47	19.4	3.87	9.42	1.18	6.55	0.97		296.458	222.466	168.175	139.662	93.5065	54.023	71.2092	59.8276	50.9186	45.5294	37.8313	32.7778	26.4113	25.5263
Ecca	mudstone	Andersson et al. (2004)		50.6	92.3	10.54	38.8	7.7	1.5	6.87	1.22	8.6	1.84	4.68	0.59	4.34	0.61		137.875	96.4472	76.9343	54.571	33.3333	17.2414	22.451	21.0345	22.5722	21.6471	18.7952	16.3889	17.5	16.0526
Ecca	mudstone	Andersson et al. (2004)		46.1	83.3	9.57	35.2	7.1	1.3	5.88	0.93	6.14	1.27	3.52	0.53	3.59	0.49		125.613	87.0428	69.854	49.5077	30.7359	14.9425	19.2157	16.0345	16.1155	14.9412	14.1365	14.7222	14.4758	12.8947
Ecca	mudstone	Andersson et al. (2004)		54.4	94.1	11.49	46.7	10.3	2.1	7.93	1.19	6.81	1.17	3.27	0.46	3.16	0.47		148.229	98.3281	83.8686	65.6821	44.5887	24.1379	25.915	20.5172	17.874	13.7647	13.1325	12.7778	12.7419	12.3684
Ecca	mudstone	Andersson et al. (2004)		45.9	81.4	9.28	34.8	6.8	1.2	4.9	0.89	5.85	1.29	3.43	0.45	3.74	0.49		125.068	85.0575	67.7372	48.9451	29.4372	13.7931	16.0131	15.3448	15.3543	15.1765	13.7751	12.5	15.0806	12.8947
Ecca	mudstone	Andersson et al. (2004)		53.3	91	10.37	39	7.4	1.3	5.48	0.91	5.43	1.19	3.42	0.63	3.92	0.58		145.232	95.0888	75.6934	54.8523	32.0346	14.9425	17.9085	15.6897	14.252	14	13.7349	17.5	15.8065	15.2632
Ecca	mudstone	Andersson et al. (2004)		60.7	105.9	11.63	44.1	9.3	1.3	6.69	0.97	6.55	1.26	3.95	0.58	4.27	0.65		165.395	110.658	84.8905	62.0253	40.2597	14.9425	21.8627	16.7241	17.1916	14.8235	15.8635	16.1111	17.2177	17.1053
Ecca	mudstone	Andersson et al. (2004)		57.2	98.8	11.1	39.6	7.8	1.2	5.82	0.93	5.78	1.31	4.2	0.59	4.63	0.72		155.858	103.239	81.0219	55.6962	33.7662	13.7931	19.0196	16.0345	15.1706	15.4118	16.8675	16.3889	18.6694	18.9474
Ecca	mudstone	Andersson et al. (2004)		61.7	107.1	12.09	45.9	9.1	1.3	7.56	1.22	9.17	1.93	5.79	0.86	6.23	0.96		168.12	111.912	88.2482	64.557	39.3939	14.9425	24.7059	21.0345	24.0682	22.7059	23.253	23.8889	25.121	25.2632
Ecca	mudstone	Andersson et al. (2004)		67.2	118.1	13.26	47.5	9.2	1.4	7.16	1.14	8.1	1.7	4.93	0.8	5.24	0.84		183.106	123.406	96.7883	66.8073	39.8268	16.092	23.3987	19.6552	21.2598	20	19.7992	22.2222	21.129	22.1053
Ecca	mudstone	Andersson et al. (2004)		54.6	98.5	11.22	42.3	8.2	1.5	6.37	1.12	7.87	1.5	3.87	0.62	3.64	0.48		148.774	102.926	81.8978	59.4937	35.4978	17.2414	20.817	19.3103	20.6562	17.6471	15.5422	17.2222	14.6774	12.6316
Ecca	mudstone	Andersson et al. (2004)		45.1	82.2	9.41	34.7	7.3	1.3	6.75	1.2	9.14	1.93	5.57	0.8	5.14	0.7		122.888	85.8934	68.6861	48.8045	31.6017	14.9425	22.0588	20.6897	23.9895	22.7059	22.3695	22.2222	20.7258	18.4211
Ecca	mudstone	Andersson et al. (2004)		87	154.9	17.36	65.7	12.8	2.2	11.24	1.88	13.9	3.03	8.43	1.23	7.51	1.16		237.057	161.86	126.715	92.4051	55.4113	25.2874	36.732	32.4138	36.4829	35.6471	33.8554	34.1667	30.2823	30.5263
Ecca	mudstone	Andersson et al. (2004)		65.5	114.3	13.09	47.8	10	1.6	8.34	1.5	9.86	2.07	5.82	0.87	5.87	0.77		178.474	119.436	95.5474	67.2293	43.29	18.3908	27.2549	25.8621	25.8793	24.3529	23.3735	24.1667	23.6694	20.2632
Ecca	mudstone	Andersson et al. (2004)		68.1	121.5	13.72	51.4	9.6	1.9	8.97	1.44	9.25	2.11	5.36	0.79	5.1	0.73		185.559	126.959	100.146	72.2925	41.5584	21.8391	29.3137	24.8276	24.2782	24.8235	21.5261	21.9444	20.5645	19.2105
Ecca	mudstone	Andersson et al. (2004)		70.8	125.8	13.85	49.6	10.4	1.8	9.29	1.56	10.5	2.24	6.17	0.97	5.73	0.94		192.916	131.452	101.095	69.7609	45.0216	20.6897	30.3595	26.8966	27.5591	26.3529	24.7791	26.9444	23.1048	24.7368
Ecca	mudstone	Andersson et al. (2004)		68.4	124.7	13.73	51.9	9.6	1.7	7.75	1.36	8.06	1.71	4.64	0.78	4.83	0.76		186.376	130.303	100.219	72.9958	41.5584	19.5402	25.3268	23.4483	21.1549	20.1176	18.6345	21.6667	19.4758	20
Ecca	mudstone	Andersson et al. (2004)		64.7	113.3	12.56	46.2	8.8	1.4	7.49	1.25	7.15	1.5	4.6	0.73	5.02	0.76		176.294	118.391	91.6788	64.9789	38.0952	16.092	24.4771	21.5517	18.7664	17.6471	18.4739	20.2778	20.2419	20
Ecca	mudstone	Andersson et al. (2004)		54.3	99.9	11.46	45.2	9.1	1.7	8.99	1.47	9.86	1.84	5.03	0.76	5.01	0.7		147.956	104.389	83.6496	63.5724	39.3939	19.5402	29.3791	25.3448	25.8793	21.6471	20.2008	21.1111	20.2016	18.4211
Ecca	mudstone	Andersson et al. (2004)		51	91.9	10.35	38.4	8.1	1.4	6.9	1.11	6.89	1.42	4.01	0.6	3.84	0.62		138.965	96.0293	75.5474	54.0084	35.0649	16.092	22.549	19.1379	18.084	16.7059	16.1044	16.6667	15.4839	16.3158
Ecca	mudstone	Andersson et al. (2004)		55.5	100.4	11.39	40.3	9.1	1.6	7.59	1.27	8.71	1.71	4.84	0.7	4.38	0.59		151.226	104.911	83.1387	56.6807	39.3939	18.3908	24.8039	21.8966	22.8609	20.1176	19.4378	19.4444	17.6613	15.5263
Ecca	mudstone	Andersson et al. (2004)		64.8	117.4	13.35	47.9	9.8	1.6	7.35	1.1	6.91	1.44	3.8	0.69	4.79	0.68		176.567	122.675	97.4453	67.3699	42.4242	18.3908	24.0196	18.9655	18.1365	16.9412	15.261	19.1667	19.3145	17.8947
Ecca	mudstone	Andersson et al. (2004)		107.4	191.4	22.73	87.4	20.1	3.6	17.06	2.8	18.5	3.83	9.57	1.21	7.59	1.04		292.643	200	165.912	122.925	87.013	41.3793	55.7516	48.2759	48.5564	45.0588	38.4337	33.6111	30.6048	27.3684
Ecca	mudstone	Andersson et al. (2004)		47.7	86.2	9.96	37.1	8.3	1.5	6.34	0.9	5.93	1.1	3.22	0.42	3.41	0.54		129.973	90.0731	72.7007	52.18	35.9307	17.2414	20.719	15.5172	15.5643	12.9412	12.9317	11.6667	13.75	14.2105
Ecca	mudstone	Andersson et al. (2004)		49.3	90.3	10.34	37.8	8.1	1.5	8.1	1.5	10.3	2	5.52	0.8	4.87	0.63		134.332	94.3574	75.4745	53.1646	35.0649	17.2414	26.4706	25.8621	27.0341	23.5294	22.1687	22.2222	19.6371	16.5789
Ecca	mudstone	Andersson et al. (2004)		53.3	95.1	11.26	41.7	8.2	1.6	6.07	0.96	5.72	1.14	3.15	0.5	3.23	0.5		145.232	99.373	82.1898	58.6498	35.4978	18.3908	19.8366	16.5517	15.0131	13.4118	12.6506	13.8889	13.0242	13.1579
Ecca	mudstone	Andersson et al. (2004)		39.2	70.5	7.8	28.8	6.3	1.1	4.3	0.72	4.4	0.9	2.78	0.4	3.01	0.45		106.812	73.6677	56.9343	40.5063	27.2727	12.6437	14.0523	12.4138	11.5486	10.5882	11.1647	11.1111	12.1371	11.8421
Ecca	mudstone	Andersson et al. (2004)		94.4	162.5	20.42	87	21.9	5.1	21.12	3	18	3.31	7.76	1.03	5.46	0.75		257.221	169.801	149.051	122.363	94.8052	58.6207	69.0196	51.7241	47.2441	38.9412	31.1647	28.6111	22.0161	19.7368
Ecca	mudstone	Andersson et al. (2004)		98.1	174.3	20.78	87.4	21.1	4.7	19.22	2.67	15.6	2.74	6.35	0.85	4.86	0.64		267.302	182.132	151.679	122.925	91.342	54.023	62.8105	46.0345	40.9449	32.2353	25.502	23.6111	19.5968	16.8421
Ecca	mudstone	Andersson et al. (2004)		34.7	62.6	7.04	25.7	5.1	0.9	3.68	0.68	3.98	0.94	3.29	0.47	3.39	0.5		94.5504	65.4127	51.3869	36.1463	22.0779	10.3448	12.0261	11.7241	10.4462	11.0588	13.2129	13.0556	13.6694	13.1579
Ecca	mudstone	Andersson et al. (2004)		39.7	73	8.18	28	5.4	0.9	3.82	0.67	4.45	0.97	2.99	0.48	3.31	0.48		108.174	76.28	59.708	39.3812	23.3766	10.3448	12.4837	11.5517	11.6798	11.4118	12.008	13.3333	13.3468	12.6316
Ecca	mudstone	Andersson et al. (2004)		45.1	85	9.54	35.3	6.9	0.9	5.25	0.76	5.02	0.97	2.62	0.41	2.67	0.44		122.888	88.8192	69.635	49.6484	29.8701	10.3448	17.1569	13.1034	13.1759	11.4118	10.5221	11.3889	10.7661	11.5789
Ecca	mudstone	Andersson et al. (2004)		31	63.5	6.73	27	5.1	0.8	3.05	0.6	3.28	0.75	2.21	0.36	2.23	0.4		84.4687	66.3532	49.1241	37.9747	22.0779	9.1954	9.96732	10.3448	8.60892	8.82353	8.8755	10	8.99194	10.5263
Ecca	mudstone	Andersson et al. (2004)		39.6	79.2	8.53	32.9	6.9	0.8	4.94	0.93	5.3	1.1	3.27	0.52	2.93	0.47		107.902	82.7586	62.2628	46.2729	29.8701	9.1954	16.1438	16.0345	13.9108	12.9412	13.1325	14.4444	11.8145	12.3684
Ecca	mudstone	Andersson et al. (2004)		29.6	58.7	6.27	24.2	4.4	0.6	3.55	0.65	3.88	0.89	2.48	0.42	2.97	0.47		80.654	61.3375	45.7664	34.0366	19.0476	6.89655	11.6013	11.2069	10.1837	10.4706	9.95984	11.6667	11.9758	12.3684
Ecca	mudstone	Andersson et al. (2004)		37.1	75.5	8.04	32	6.4	1.1	4.52	0.83	5.01	1.28	3.22	0.5	3.08	0.49		101.09	78.8924	58.6861	45.007	27.7056	12.6437	14.7712	14.3103	13.1496	15.0588	12.9317	13.8889	12.4194	12.8947
Ecca	mudstone	Andersson et al. (2004)		20.1	55.5	5.8	29.1	7	1.3	6.14	1.45	6.39	1.33	3.61	0.57	3.98	0.63		54.7684	57.9937	42.3358	40.9283	30.303	14.9425	20.0654	25	16.7717	15.6471	14.498	15.8333	16.0484	16.5789
Ecca	mudstone	Andersson et al. (2004)		58.4	154	11.05	46.3	8.2	1.5	6.41	1.71	6.39	1.28	3.67	0.63	3.83	0.63		159.128	160.92	80.6569	65.1195	35.4978	17.2414	20.9477	29.4828	16.7717	15.0588	14.739	17.5	15.4435	16.5789
Ecca	mudstone	Andersson et al. (2004)		43.4	110.2	9.66	41.5	8.9	1.5	6.87	1.73	7.24	1.46	4.15	0.64	4.18	0.69		118.256	115.152	70.5109	58.3685	38.5281	17.2414	22.451	29.8276	19.0026	17.1765	16.6667	17.7778	16.8548	18.1579
Ecca	mudstone	Andersson et al. (2004)		30.2	56.2	7.57	33	7.3	1.4	6.3	1.55	6.69	1.22	3.83	0.6	3.81	0.63		82.2888	58.7252	55.2555	46.4135	31.6017	16.092	20.5882	26.7241	17.5591	14.3529	15.3815	16.6667	15.3629	16.5789
Ecca	mudstone	Andersson et al. (2004)		28.2	71.1	7.26	29.3	7.4	1.2	5.76	1.31	5.39	1.15	3.49	0.57	3.51	0.5		76.8392	74.2947	52.9927	41.2096	32.0346	13.7931	18.8235	22.5862	14.147	13.5294	14.0161	15.8333	14.1532	13.1579
Ecca	mudstone	Andersson et al. (2004)		32.1	56.4	8.25	36.6	9.5	1.6	6.48	1.63	6.84	1.26	3.6	0.51	3.23	0.53		87.4659	58.9342	60.219	51.4768	41.1255	18.3908	21.1765	28.1034	17.9528	14.8235	14.4578	14.1667	13.0242	13.9474
Ecca	mudstone	Andersson et al. (2004)		33.2	68.2	7.51	33.1	6.6	1.4	6.22	1.58	6.25	1.35	3.78	0.62	0.71	0.52		90.4632	71.2644	54.8175	46.5541	28.5714	16.092	20.3268	27.2414	16.4042	15.8824	15.1807	17.2222	2.8629	13.6842
Ecca	mudstone	Andersson et al. (2004)		39.9	79.9	8.37	34.5	7.7	1.3	6.3	1.48	6.26	1.34	4.1	0.64	3.88	0.62		108.719	83.4901	61.0949	48.5232	33.3333	14.9425	20.5882	25.5172	16.4304	15.7647	16.4659	17.7778	15.6452	16.3158
Ecca	mudstone	Andersson et al. (2004)		40.8	84	8.73	38.2	7.5	1.4	7.03	1.58	6.35	1.31	3.94	0.61	3.89	0.63		111.172	87.7743	63.7226	53.7271	32.4675	16.092	22.9739	27.2414	16.6667	15.4118	15.8233	16.9444	15.6855	16.5789
Ecca	mudstone	Andersson et al. (2004)		34.2	70.1	7.63	33.8	7.7	1.4	6.32	1.51	6.56	1.3	4.13	0.63	4.26	0.66		93.188	73.2497	55.6934	47.5387	33.3333	16.092	20.6536	26.0345	17.2178	15.2941	16.5863	17.5	17.1774	17.3684
Ecca	mudstone	Andersson et al. (2004)		42.1	85	9.33	40.8	9.3	1.6	7.32	1.8	7.28	1.6	4.17	0.67	4.08	0.58		114.714	88.8192	68.1022	57.384	40.2597	18.3908	23.9216	31.0345	19.1076	18.8235	16.747	18.6111	16.4516	15.2632
Ecca	mudstone	Andersson et al. (2004)		44.6	89	9.43	40.2	8.3	1.6	7.62	1.74	7.55	1.49	4.45	0.71	4.47	0.67		121.526	92.999	68.8321	56.5401	35.9307	18.3908	24.902	30	19.8163	17.5294	17.8715	19.7222	18.0242	17.6316
Ecca	mudstone	Andersson et al. (2004)		29.9	62.8	6.86	29.8	7.3	1.3	5.84	1.48	6.41	1.28	3.98	0.57	3.81	0.59		81.4714	65.6217	50.073	41.9128	31.6017	14.9425	19.085	25.5172	16.8241	15.0588	15.9839	15.8333	15.3629	15.5263
Ecca	mudstone	Andersson et al. (2004)		29.6	60.4	7.08	30.2	7.1	1.4	6.48	1.72	7.39	1.47	4.32	0.7	4.31	0.7		80.654	63.1139	51.6788	42.4754	30.7359	16.092	21.1765	29.6552	19.3963	17.2941	17.3494	19.4444	17.379	18.4211
Ecca	mudstone	Andersson et al. (2004)		38.3	75.3	8.32	35.6	8.9	1.7	7.3	1.77	7.79	1.48	4.6	0.71	4.29	0.74		104.36	78.6834	60.7299	50.0703	38.5281	19.5402	23.8562	30.5172	20.4462	17.4118	18.4739	19.7222	17.2984	19.4737
Ecca	mudstone	Andersson et al. (2004)		39	77	7.97	33.1	6.6	1.3	6.47	1.51	6.32	1.19	3.94	0.61	3.86	0.58		106.267	80.4598	58.1752	46.5541	28.5714	14.9425	21.1438	26.0345	16.5879	14	15.8233	16.9444	15.5645	15.2632
Ecca	mudstone	Andersson et al. (2004)		48.1	93.3	10.4	40.3	8	1.6	6.53	1.6	6.93	1.29	4.09	0.61	0.82	0.56		131.063	97.4922	75.9124	56.6807	34.632	18.3908	21.3399	27.5862	18.189	15.1765	16.4257	16.9444	3.30645	14.7368
Ecca	mudstone	Andersson et al. (2004)		46.4	90	9.39	37	6.8	1.4	6.18	1.53	6.45	1.32	3.92	0.58	4.24	0.68		126.431	94.0439	68.5401	52.0394	29.4372	16.092	20.1961	26.3793	16.9291	15.5294	15.743	16.1111	17.0968	17.8947
Ecca	mudstone	Andersson et al. (2004)		41	83	8.85	33.9	7.5	1.3	6.44	1.47	6.71	1.34	4.01	0.56	4.2	0.62		111.717	86.7294	64.5985	47.6793	32.4675	14.9425	21.0458	25.3448	17.6115	15.7647	16.1044	15.5556	16.9355	16.3158
Ecca	mudstone	Andersson et al. (2004)		40.1	80.1	9.19	34.9	7	1.4	5.87	1.47	6.61	1.33	3.76	0.54	3.45	0.6		109.264	83.6991	67.0803	49.0858	30.303	16.092	19.183	25.3448	17.3491	15.6471	15.1004	15	13.9113	15.7895
Ecca	mudstone	Andersson et al. (2004)		59	111.3	11.45	42.7	7.7	1.3	6.18	1.51	6.66	1.2	3.84	0.61	3.83	0.63		160.763	116.301	83.5766	60.0563	33.3333	14.9425	20.1961	26.0345	17.4803	14.1176	15.4217	16.9444	15.4435	16.5789
Ecca	mudstone	Andersson et al. (2004)		34.2	68.8	7.97	32.9	7.1	1.2	6.11	1.36	5.9	1.16	3.43	0.54	3.5	0.49		93.188	71.8913	58.1752	46.2729	30.7359	13.7931	19.9673	23.4483	15.4856	13.6471	13.7751	15	14.1129	12.8947
Ecca	mudstone	Andersson et al. (2004)		37.5	75.3	8.33	33.5	6.5	1.4	5.37	1.3	5.97	1.15	3.37	0.51	3.42	0.56		102.18	78.6834	60.8029	47.1167	28.1385	16.092	17.549	22.4138	15.6693	13.5294	13.5341	14.1667	13.7903	14.7368
Ecca	mudstone	Andersson et al. (2004)		31.2	64.6	7.42	39.9	6.9	1.2	5.92	1.45	5.65	1.15	3.22	0.54	3.5	0.51		85.0136	67.5026	54.1606	56.1181	29.8701	13.7931	19.3464	25	14.8294	13.5294	12.9317	15	14.1129	13.4211
Ecca	mudstone	Andersson et al. (2004)		39.3	77.9	8.93	36.8	7.3	1.6	6.44	1.57	6.64	1.3	3.86	0.6	3.35	0.51		107.084	81.4002	65.1825	51.7581	31.6017	18.3908	21.0458	27.069	17.4278	15.2941	15.502	16.6667	13.5081	13.4211
Ecca	mudstone	Andersson et al. (2004)		34.5	69.6	8.29	33.6	7.3	1.3	6.3	1.52	6.11	1.29	3.62	0.52	3.67	0.58		94.0054	72.7273	60.5109	47.2574	31.6017	14.9425	20.5882	26.2069	16.0367	15.1765	14.5382	14.4444	14.7984	15.2632
Ecca	mudstone	Andersson et al. (2004)		32.7	67	7.87	32.3	6	1.2	5.65	1.38	5.84	1.18	3.45	0.52	3.33	0.55		89.1008	70.0104	57.4453	45.429	25.974	13.7931	18.4641	23.7931	15.3281	13.8824	13.8554	14.4444	13.4274	14.4737
Ecca	mudstone	Andersson et al. (2004)		33.9	72.4	7.73	29.3	5.7	1	4.65	1.15	4.96	0.97	2.68	0.47	2.7	0.45		92.3706	75.6531	56.4234	41.2096	24.6753	11.4943	15.1961	19.8276	13.0184	11.4118	10.7631	13.0556	10.8871	11.8421
Ecca	mudstone	Andersson et al. (2004)		32.1	64.5	7.22	28.5	6	1	4.87	1.26	4.9	1.04	3.13	0.47	3.13	0.48		87.4659	67.3981	52.7007	40.0844	25.974	11.4943	15.915	21.7241	12.8609	12.2353	12.5703	13.0556	12.621	12.6316
Ecca	mudstone	Andersson et al. (2004)		33.1	66.7	7.93	29.2	5.8	1.2	5.17	1.33	5.8	1.11	3.38	0.49	3.21	0.5		90.1907	69.697	57.8832	41.0689	25.1082	13.7931	16.8954	22.931	15.2231	13.0588	13.5743	13.6111	12.9435	13.1579
Ecca	mudstone	Andersson et al. (2004)		86.4	166.1	19.38	80.1	14.9	2.6	13.53	2.51	9.72	1.81	4.75	0.65	4.43	0.71		235.422	173.563	141.46	112.658	64.5022	29.8851	44.2157	43.2759	25.5118	21.2941	19.0763	18.0556	17.8629	18.6842
Ecca	mudstone	Andersson et al. (2004)		34.1	70.8	7.39	31.2	5.2	1.1	4.96	0.85	5.31	0.87	2.64	0.41	3.29	0.47		92.9155	73.9812	53.9416	43.8819	22.5108	12.6437	16.2092	14.6552	13.937	10.2353	10.6024	11.3889	13.2661	12.3684
Ecca	mudstone	Andersson et al. (2004)		36.8	85.6	8.7	36.9	7.6	1.2	5.55	0.88	5.55	0.98	2.67	0.35	3.16	0.44		100.272	89.4462	63.5036	51.8987	32.9004	13.7931	18.1373	15.1724	14.5669	11.5294	10.7229	9.72222	12.7419	11.5789
Ecca	mudstone	Andersson et al. (2004)		37.7	75.7	7.89	33.3	7.6	1.1	5.27	0.92	5.42	1.19	3.01	0.51	4.36	0.64		102.725	79.1014	57.5912	46.8354	32.9004	12.6437	17.2222	15.8621	14.2257	14	12.0884	14.1667	17.5806	16.8421
Ecca	mudstone	Andersson et al. (2004)		47.6	108.8	11.13	48.9	9.8	1	8.71	1.23	6.01	1.23	3.02	0.51	4.18	0.6		129.7	113.689	81.2409	68.7764	42.4242	11.4943	28.4641	21.2069	15.7743	14.4706	12.1285	14.1667	16.8548	15.7895
Ecca	mudstone	Andersson et al. (2004)		56.6	113.7	11.6	51.1	9	1.8	10.88	1.34	8.72	1.8	4.44	0.78	5.47	0.79		154.223	118.809	84.6715	71.8706	38.961	20.6897	35.5556	23.1034	22.8871	21.1765	17.8313	21.6667	22.0565	20.7895
Ecca	mudstone	Andersson et al. (2004)		44.1	87.8	10.3	41.5	7.7	1.6	7.03	1.13	7.6	1.48	4.31	0.6	5.06	0.66		120.163	91.745	75.1825	58.3685	33.3333	18.3908	22.9739	19.4828	19.9475	17.4118	17.3092	16.6667	20.4032	17.3684
Ecca	mudstone	Andersson et al. (2004)		36.4	78.7	8.68	35.9	6.8	1.4	8.1	1.21	6.44	1.33	3.39	0.54	3.98	0.49		99.1826	82.2362	63.3577	50.4923	29.4372	16.092	26.4706	20.8621	16.9029	15.6471	13.6145	15	16.0484	12.8947
Ecca	mudstone	Andersson et al. (2004)		33.2	74.5	7.45	36	8.3	1.4	7.61	1.03	7.14	1.16	3.66	0.53	3.84	0.56		90.4632	77.8474	54.3796	50.6329	35.9307	16.092	24.8693	17.7586	18.7402	13.6471	14.6988	14.7222	15.4839	14.7368
Ecca	mudstone	Andersson et al. (2004)		35.8	77	8.33	38.4	5	1.3	6.66	1	6.65	1.24	3.76	0.66	5.07	0.72		97.5477	80.4598	60.8029	54.0084	21.645	14.9425	21.7647	17.2414	17.4541	14.5882	15.1004	18.3333	20.4435	18.9474
Ecca	mudstone	Andersson et al. (2004)		40.4	83.2	9.31	36.3	6.7	1.2	6.8	1.12	6.79	1.26	3.68	0.46	3.57	0.67		110.082	86.9383	67.9562	51.0549	29.0043	13.7931	22.2222	19.3103	17.8215	14.8235	14.7791	12.7778	14.3952	17.6316
Ecca	mudstone	Andersson et al. (2004)		39.8	84.1	8.98	36.4	6.9	1.7	8.25	1.28	6.96	1.53	4.29	0.62	4.53	0.68		108.447	87.8788	65.5474	51.1955	29.8701	19.5402	26.9608	22.069	18.2677	18	17.2289	17.2222	18.2661	17.8947
Ecca	mudstone	Andersson et al. (2004)		45.9	94.1	9.85	38.4	6.1	1.3	6.75	0.82	6.13	0.94	2.8	0.47	3.64	0.57		125.068	98.3281	71.8978	54.0084	26.4069	14.9425	22.0588	14.1379	16.0892	11.0588	11.245	13.0556	14.6774	15
Ecca	mudstone	Andersson et al. (2004)		46.5	93.2	9.85	41.6	7.9	1.6	6.55	0.84	5.32	0.96	2.58	0.5	4.21	0.65		126.703	97.3877	71.8978	58.5091	34.1991	18.3908	21.4052	14.4828	13.9633	11.2941	10.3614	13.8889	16.9758	17.1053
Ecca	mudstone	Andersson et al. (2004)		44.4	93.9	9.95	41.3	6.3	1.6	7.88	1.16	6.64	1.21	3.12	0.56	3.51	0.45		120.981	98.1191	72.6277	58.0872	27.2727	18.3908	25.7516	20	17.4278	14.2353	12.5301	15.5556	14.1532	11.8421
Ecca	mudstone	Andersson et al. (2004)		40.6	83.7	9.06	37.6	7.1	1.4	7.31	1.05	6.11	1.43	3.38	0.56	4.14	0.61		110.627	87.4608	66.1314	52.8833	30.7359	16.092	23.8889	18.1034	16.0367	16.8235	13.5743	15.5556	16.6935	16.0526
Ecca	mudstone	Andersson et al. (2004)		41.2	83.2	9.65	41.4	6.7	1.5	6.09	0.91	5.34	1.36	3.48	0.55	3.86	0.59		112.262	86.9383	70.438	58.2278	29.0043	17.2414	19.902	15.6897	14.0157	16	13.9759	15.2778	15.5645	15.5263
Ecca	mudstone	Andersson et al. (2004)		43.5	84.8	9.74	39.8	7.3	1.2	6.55	0.88	6.49	1.21	3.37	0.44	3.82	0.55		118.529	88.6102	71.0949	55.9775	31.6017	13.7931	21.4052	15.1724	17.0341	14.2353	13.5341	12.2222	15.4032	14.4737
Ecca	mudstone	Andersson et al. (2004)		43.8	89.5	10.1	41	6.9	1.2	7.63	1.11	6.78	1.41	3.65	0.55	4.23	0.56		119.346	93.5214	73.7226	57.6653	29.8701	13.7931	24.9346	19.1379	17.7953	16.5882	14.6586	15.2778	17.0565	14.7368
Ecca	mudstone	Andersson et al. (2004)		38.7	78	8.8	40.2	7.8	1.3	6.92	0.86	5.48	1.2	3.28	0.42	3.26	0.57		105.45	81.5047	64.2336	56.5401	33.7662	14.9425	22.6144	14.8276	14.3832	14.1176	13.1727	11.6667	13.1452	15
Ecca	mudstone	Andersson et al. (2004)		39.5	78.2	8.88	36	6.8	1.4	6.73	0.97	6.21	1.18	3.31	0.47	3.93	0.51		107.629	81.7137	64.8175	50.6329	29.4372	16.092	21.9935	16.7241	16.2992	13.8824	13.2932	13.0556	15.8468	13.4211
Ecca	mudstone	Andersson et al. (2004)		39.6	74.9	8.35	34	5.1	1.3	5.51	0.95	6.01	1.05	3.15	0.55	3.78	0.63		107.902	78.2654	60.9489	47.82	22.0779	14.9425	18.0065	16.3793	15.7743	12.3529	12.6506	15.2778	15.2419	16.5789
Ecca	mudstone	Andersson et al. (2004)		34.2	64.3	7.32	29.9	4.2	1.4	4.73	0.77	5.33	0.89	2.69	0.36	3.01	0.46		93.188	67.1891	53.4307	42.0534	18.1818	16.092	15.4575	13.2759	13.9895	10.4706	10.8032	10	12.1371	12.1053
Ecca	mudstone	Andersson et al. (2004)		45.2	85.9	9.26	36.9	5.1	1.2	5.19	0.73	4.99	1.03	2.99	0.52	3.16	0.47		123.161	89.7597	67.5912	51.8987	22.0779	13.7931	16.9608	12.5862	13.0971	12.1176	12.008	14.4444	12.7419	12.3684
Ecca	mudstone	Andersson et al. (2004)		38.8	78.9	8.52	34.3	5.9	1.2	6.49	0.9	5.62	1.07	2.75	0.49	4.52	0.51		105.722	82.4451	62.1898	48.2419	25.5411	13.7931	21.2092	15.5172	14.7507	12.5882	11.0442	13.6111	18.2258	13.4211
Ecca	mudstone	Andersson et al. (2004)		42.8	77.4	9.16	37.5	6	1.2	5.87	0.82	5.95	1.14	2.77	0.42	3.43	0.52		116.621	80.8777	66.8613	52.7426	25.974	13.7931	19.183	14.1379	15.6168	13.4118	11.1245	11.6667	13.8306	13.6842
Ecca	mudstone	Andersson et al. (2004)		44	86.6	9.38	38.3	5.8	1.3	5.52	0.92	5.84	1.12	3.06	0.53	4.64	0.59		119.891	90.4911	68.4672	53.8678	25.1082	14.9425	18.0392	15.8621	15.3281	13.1765	12.2892	14.7222	18.7097	15.5263
Ecca	mudstone	Andersson et al. (2004)		44.6	80.5	9.82	44.1	7.5	1.5	6.13	0.94	6.31	1.21	3.2	0.46	3.81	0.51		121.526	84.117	71.6788	62.0253	32.4675	17.2414	20.0327	16.2069	16.5617	14.2353	12.8514	12.7778	15.3629	13.4211
Ecca	mudstone	Andersson et al. (2004)		36.9	73.4	8.64	37	5.9	1.4	5.46	1.02	5.79	1.18	2.94	0.45	3.74	0.52		100.545	76.698	63.0657	52.0394	25.5411	16.092	17.8431	17.5862	15.1969	13.8824	11.8072	12.5	15.0806	13.6842
Ecca	mudstone	Andersson et al. (2004)		40.2	79.2	8.86	34.1	5.5	1.1	5.52	0.85	5.63	1.18	3.12	0.46	2.97	0.51		109.537	82.7586	64.6715	47.9606	23.8095	12.6437	18.0392	14.6552	14.7769	13.8824	12.5301	12.7778	11.9758	13.4211
Ecca	mudstone	Andersson et al. (2004)		47	93.9	10.37	43.6	8.4	1.9	8.43	1.26	7.18	1.29	3.85	0.58	4.77	0.59		128.065	98.1191	75.6934	61.3221	36.3636	21.8391	27.549	21.7241	18.8451	15.1765	15.4618	16.1111	19.2339	15.5263
Ecca	mudstone	Andersson et al. (2004)		43.7	90.4	9.84	40.6	6.9	1.4	7.6	1.21	6.73	1.35	3.6	0.48	4	0.62		119.074	94.4619	71.8248	57.1027	29.8701	16.092	24.8366	20.8621	17.664	15.8824	14.4578	13.3333	16.129	16.3158
Ecca	mudstone	Andersson et al. (2004)		47.1	90.8	10.6	41	8.1	1.4	6.35	1.18	6.63	1.33	3.43	0.59	3.99	0.57		128.338	94.8798	77.3723	57.6653	35.0649	16.092	20.7516	20.3448	17.4016	15.6471	13.7751	16.3889	16.0887	15
Ecca	mudstone	Andersson et al. (2004)		52.5	103	11.76	45.1	8.5	1.5	6.94	1.21	6.86	1.53	3.98	0.65	4.17	0.66		143.052	107.628	85.8394	63.4318	36.7965	17.2414	22.6797	20.8621	18.0052	18	15.9839	18.0556	16.8145	17.3684
Ecca	mudstone	Andersson et al. (2004)		51.7	102.2	11.57	43.3	8.8	1.5	7.35	1.2	6.53	1.49	4.05	0.59	4.04	0.62		140.872	106.792	84.4526	60.9001	38.0952	17.2414	24.0196	20.6897	17.1391	17.5294	16.2651	16.3889	16.2903	16.3158
Ecca	mudstone	Andersson et al. (2004)		48.2	93.3	10.86	40.2	7.9	1.5	6.93	1.02	6.3	1.4	3.64	0.63	3.9	0.64		131.335	97.4922	79.2701	56.5401	34.1991	17.2414	22.6471	17.5862	16.5354	16.4706	14.6185	17.5	15.7258	16.8421
Ecca	mudstone	Andersson et al. (2004)		46.2	88.4	10.18	40.2	7.4	1.5	6.95	1.06	6.31	1.43	3.54	0.54	3.34	0.61		125.886	92.372	74.3066	56.5401	32.0346	17.2414	22.7124	18.2759	16.5617	16.8235	14.2169	15	13.4677	16.0526
Ecca	mudstone	Andersson et al. (2004)		43.6	84.1	9.8	38.6	7	1.4	6.29	1.05	5.78	1.27	3.63	0.57	3.74	0.56		118.801	87.8788	71.5328	54.2897	30.303	16.092	20.5556	18.1034	15.1706	14.9412	14.5783	15.8333	15.0806	14.7368
Ecca	mudstone	Andersson et al. (2004)		59.7	114.1	12.71	45	8.4	1.5	6.99	1.15	7.03	1.54	4.11	0.67	4.63	0.66		162.67	119.227	92.7737	63.2911	36.3636	17.2414	22.8431	19.8276	18.4514	18.1176	16.506	18.6111	18.6694	17.3684
Ecca	mudstone	Andersson et al. (2004)		52	96.1	10.6	41.6	6.9	1.4	6.28	1.04	6.26	1.45	3.92	0.66	4.07	0.67		141.689	100.418	77.3723	58.5091	29.8701	16.092	20.5229	17.931	16.4304	17.0588	15.743	18.3333	16.4113	17.6316
Ecca	mudstone	Andersson et al. (2004)		45.7	89.3	9.88	38.1	6.4	1.3	5.87	1	5.75	1.23	3.3	0.56	3.69	0.55		124.523	93.3124	72.1168	53.5865	27.7056	14.9425	19.183	17.2414	15.0919	14.4706	13.253	15.5556	14.879	14.4737
Ecca	mudstone	Andersson et al. (2004)		52.4	100	11.37	42.5	8.1	1.5	7.01	1.12	6.8	1.31	3.6	0.56	3.81	0.59		142.779	104.493	82.9927	59.775	35.0649	17.2414	22.9085	19.3103	17.8478	15.4118	14.4578	15.5556	15.3629	15.5263
Ecca	mudstone	Andersson et al. (2004)		51.8	98.8	11.24	42.1	7.5	1.4	6.92	1.18	7.09	1.46	3.83	0.62	4.03	0.67		141.144	103.239	82.0438	59.2124	32.4675	16.092	22.6144	20.3448	18.6089	17.1765	15.3815	17.2222	16.25	17.6316
Ecca	mudstone	Andersson et al. (2004)		48.7	93.5	10.16	39.1	6.8	1.4	6.63	1.12	6.35	1.41	3.96	0.65	4.37	0.71		132.698	97.7011	74.1606	54.993	29.4372	16.092	21.6667	19.3103	16.6667	16.5882	15.9036	18.0556	17.621	18.6842
Ecca	mudstone	Andersson et al. (2004)		54.3	104.8	11.8	43.4	8.1	1.3	7.01	1.12	6.64	1.5	3.86	0.62	4.07	0.68		147.956	109.509	86.1314	61.0408	35.0649	14.9425	22.9085	19.3103	17.4278	17.6471	15.502	17.2222	16.4113	17.8947
Ecca	mudstone	Andersson et al. (2004)		46.3	88.4	10.26	38.1	6.9	1.5	6.08	1.03	6.09	1.28	3.6	0.53	3.82	0.57		126.158	92.372	74.8905	53.5865	29.8701	17.2414	19.8693	17.7586	15.9843	15.0588	14.4578	14.7222	15.4032	15
Ecca	mudstone	Andersson et al. (2004)		51.3	99.5	11.06	41.4	8.6	1.5	6.38	1.01	6.62	1.52	3.89	0.6	4.19	0.66		139.782	103.971	80.7299	58.2278	37.2294	17.2414	20.8497	17.4138	17.3753	17.8824	15.6225	16.6667	16.8952	17.3684
Ecca	mudstone	Andersson et al. (2004)		47.8	91.7	10.4	39.7	7.5	1.4	6.72	1.09	6.41	1.43	3.95	0.52	4.09	0.64		130.245	95.8203	75.9124	55.8368	32.4675	16.092	21.9608	18.7931	16.8241	16.8235	15.8635	14.4444	16.4919	16.8421
Ecca	mudstone	Andersson et al. (2004)		56.2	104.7	11.52	41.7	8.8	1.7	7.02	1.15	6.99	1.53	4.35	0.61	4.58	0.7		153.134	109.404	84.0876	58.6498	38.0952	19.5402	22.9412	19.8276	18.3465	18	17.4699	16.9444	18.4677	18.4211
Ecca	mudstone	Andersson et al. (2004)		44.3	87.7	10.13	38.8	7.9	1.2	6.2	1.01	6.35	1.3	3.67	0.5	3.32	0.54		120.708	91.6405	73.9416	54.571	34.1991	13.7931	20.2614	17.4138	16.6667	15.2941	14.739	13.8889	13.3871	14.2105
Ecca	mudstone	Andersson et al. (2004)		48.9	97.9	10.81	40.5	7.8	1.5	6.65	1.11	6.3	1.35	3.56	0.53	3.94	0.57		133.243	102.299	78.9051	56.962	33.7662	17.2414	21.732	19.1379	16.5354	15.8824	14.2972	14.7222	15.8871	15
Ecca	mudstone	Andersson et al. (2004)		56.5	108.7	12.15	44.1	8.6	1.5	6.39	1.14	6.78	1.44	3.46	0.54	3.9	0.6		153.951	113.584	88.6861	62.0253	37.2294	17.2414	20.8824	19.6552	17.7953	16.9412	13.8956	15	15.7258	15.7895
Ecca	mudstone	Andersson et al. (2004)		48.8	92.5	10.1	39.7	8.4	1.3	6.8	0.93	5.51	1.18	3.21	0.44	3.61	0.5		132.97	96.6562	73.7226	55.8368	36.3636	14.9425	22.2222	16.0345	14.4619	13.8824	12.8916	12.2222	14.5565	13.1579
Ecca	mudstone	Andersson et al. (2004)		57.9	111.2	12.4	44.4	8.5	1.6	6.85	1.29	7.02	1.55	3.87	0.59	4.05	0.61		157.766	116.196	90.5109	62.4473	36.7965	18.3908	22.3856	22.2414	18.4252	18.2353	15.5422	16.3889	16.3306	16.0526
Ecca	mudstone	Andersson et al. (2004)		47.7	92.7	10.64	40.2	8.5	1.6	6.46	1.05	6.35	1.26	3.41	0.48	3.41	0.58		129.973	96.8652	77.6642	56.5401	36.7965	18.3908	21.1111	18.1034	16.6667	14.8235	13.6948	13.3333	13.75	15.2632
Ecca	mudstone	Andersson et al. (2004)		47.8	94.8	10.74	41.1	8.4	1.5	7.59	1.17	7.21	1.55	3.96	0.58	4.11	0.68		130.245	99.0596	78.3942	57.8059	36.3636	17.2414	24.8039	20.1724	18.9239	18.2353	15.9036	16.1111	16.5726	17.8947
Ecca	mudstone	Andersson et al. (2004)		39.9	78.9	9.45	36.6	7.2	1.3	6.38	1.13	6.6	1.46	4.01	0.63	4.27	0.64		108.719	82.4451	68.9781	51.4768	31.1688	14.9425	20.8497	19.4828	17.3228	17.1765	16.1044	17.5	17.2177	16.8421
Ecca	mudstone	Andersson et al. (2004)		45.3	88.7	10.14	42	8.1	1.5	7.24	1.2	7.04	1.32	3.92	0.56	3.62	0.62		123.433	92.6855	74.0146	59.0717	35.0649	17.2414	23.6601	20.6897	18.4777	15.5294	15.743	15.5556	14.5968	16.3158
Ecca	mudstone	Andersson et al. (2004)		55.2	110	12.98	51.7	11.1	1.7	8	1.34	8.4	1.62	4.48	0.61	4.33	0.71		150.409	114.943	94.7445	72.7145	48.0519	19.5402	26.1438	23.1034	22.0472	19.0588	17.992	16.9444	17.4597	18.6842
Ecca	mudstone	Andersson et al. (2004)		45.8	92.6	10.87	41.2	9.9	1.6	7.84	1.11	7.5	1.41	3.82	0.57	3.72	0.55		124.796	96.7607	79.3431	57.9466	42.8571	18.3908	25.6209	19.1379	19.685	16.5882	15.3414	15.8333	15	14.4737
Ecca	mudstone	Andersson et al. (2004)		40.2	84.1	9.61	35.7	8.6	1.3	6.8	1.1	6.13	1.29	3.31	0.49	3.3	0.5		109.537	87.8788	70.146	50.211	37.2294	14.9425	22.2222	18.9655	16.0892	15.1765	13.2932	13.6111	13.3065	13.1579
Ecca	mudstone	Andersson et al. (2004)		57.9	106.1	11.86	41.6	8.3	1.2	5.88	0.9	5.73	1.15	3	0.43	2.81	0.47		157.766	110.867	86.5693	58.5091	35.9307	13.7931	19.2157	15.5172	15.0394	13.5294	12.0482	11.9444	11.3306	12.3684
Ecca	mudstone	Andersson et al. (2004)		44.8	87.1	10.35	41.9	8.4	1.4	7.33	1	6.39	1.3	3.5	0.46	3.34	0.54		122.071	91.0136	75.5474	58.9311	36.3636	16.092	23.9542	17.2414	16.7717	15.2941	14.0562	12.7778	13.4677	14.2105
Ecca	mudstone	Andersson et al. (2004)		43.5	83.5	10.05	41.3	7.4	1.3	5.94	1.08	5.92	1.29	3.44	0.58	3.37	0.54		118.529	87.2518	73.3577	58.0872	32.0346	14.9425	19.4118	18.6207	15.5381	15.1765	13.8153	16.1111	13.5887	14.2105
Ecca	mudstone	Andersson et al. (2004)		43.4	80.3	9.95	41.5	7.5	1.3	5.7	0.95	5.72	1.17	3.4	0.53	3.08	0.49		118.256	83.908	72.6277	58.3685	32.4675	14.9425	18.6275	16.3793	15.0131	13.7647	13.6546	14.7222	12.4194	12.8947
Ecca	mudstone	Andersson et al. (2004)		33.6	66.1	8.04	36.6	6.3	1.3	5.41	0.91	5.45	1.07	3.28	0.51	3.3	0.52		91.5531	69.07	58.6861	51.4768	27.2727	14.9425	17.6797	15.6897	14.3045	12.5882	13.1727	14.1667	13.3065	13.6842
Ecca	mudstone	Andersson et al. (2004)		42.8	79	9.46	37.8	7.2	1.3	5.78	0.97	5.44	1.07	2.87	0.51	3.02	0.48		116.621	82.5496	69.0511	53.1646	31.1688	14.9425	18.8889	16.7241	14.2782	12.5882	11.5261	14.1667	12.1774	12.6316
Ecca	mudstone	Andersson et al. (2004)		45.5	81.6	9.83	40.9	7.5	1.2	5.44	0.86	5.15	0.95	2.75	0.44	2.68	0.44		123.978	85.2665	71.7518	57.5246	32.4675	13.7931	17.7778	14.8276	13.5171	11.1765	11.0442	12.2222	10.8065	11.5789
Ecca	mudstone	Andersson et al. (2004)		53.6	89.6	11.59	50.5	9.3	1.6	8.47	1.33	7.42	1.49	3.93	0.63	3.58	0.55		146.049	93.6259	84.5985	71.0267	40.2597	18.3908	27.6797	22.931	19.4751	17.5294	15.7831	17.5	14.4355	14.4737
Ecca	mudstone	Andersson et al. (2004)		42.9	77.3	9.14	35.6	5.9	1.2	5.19	0.95	5.1	0.97	2.84	0.42	2.98	0.43		116.894	80.7732	66.7153	50.0703	25.5411	13.7931	16.9608	16.3793	13.3858	11.4118	11.4056	11.6667	12.0161	11.3158
Ecca	mudstone	Andersson et al. (2004)		41.6	78.4	9.16	36.6	6.1	1.2	5.24	0.87	4.91	1.01	3.11	0.47	2.66	0.4		113.351	81.9227	66.8613	51.4768	26.4069	13.7931	17.1242	15	12.8871	11.8824	12.49	13.0556	10.7258	10.5263
Ecca	mudstone	Andersson et al. (2004)		47.6	70.4	8.15	33.8	6.6	1	7.27	1.3	8.7	2.15	7.15	1.18	7.35	1.24		129.7	73.5632	59.4891	47.5387	28.5714	11.4943	23.7582	22.4138	22.8346	25.2941	28.7149	32.7778	29.6371	32.6316
Ecca	mudstone	Andersson et al. (2004)		43.2	81.4	9.6	38.7	7	1.2	6.76	1.17	6.83	1.4	4.3	0.64	4.15	0.61		117.711	85.0575	70.073	54.4304	30.303	13.7931	22.0915	20.1724	17.9265	16.4706	17.2691	17.7778	16.7339	16.0526
Ecca	mudstone	Andersson et al. (2004)		50.3	94.2	11.36	43.7	8.6	1.4	7.28	1.26	7.47	1.4	4.29	0.72	3.95	0.62		137.057	98.4326	82.9197	61.4627	37.2294	16.092	23.7908	21.7241	19.6063	16.4706	17.2289	20	15.9274	16.3158
Ecca	mudstone	Andersson et al. (2004)		42.7	80	9.91	40.3	7.6	1.4	6.99	1.23	7.37	1.5	4.31	0.68	4.33	0.74		116.349	83.5946	72.3358	56.6807	32.9004	16.092	22.8431	21.2069	19.3438	17.6471	17.3092	18.8889	17.4597	19.4737
Ecca	mudstone	Andersson et al. (2004)		49.2	93	10.96	42.6	8.2	1.5	6.48	1.28	7.56	1.5	4.2	0.66	4.23	0.65		134.06	97.1787	80	59.9156	35.4978	17.2414	21.1765	22.069	19.8425	17.6471	16.8675	18.3333	17.0565	17.1053
Ecca	mudstone	Andersson et al. (2004)		53.3	100.4	12.02	48.9	8.6	1.6	7.59	1.35	7.42	1.44	4.21	0.76	3.96	0.64		145.232	104.911	87.7372	68.7764	37.2294	18.3908	24.8039	23.2759	19.4751	16.9412	16.9076	21.1111	15.9677	16.8421
Ecca	mudstone	Andersson et al. (2004)		52.4	98.8	11.52	42.8	8.2	1.6	7.31	1.27	6.82	1.39	3.92	0.69	4.12	0.65		142.779	103.239	84.0876	60.1969	35.4978	18.3908	23.8889	21.8966	17.9003	16.3529	15.743	19.1667	16.6129	17.1053
Ecca	mudstone	Andersson et al. (2004)		47.2	92.9	11.07	43	7.9	1.6	7.43	1.26	7.33	1.33	4	0.59	3.77	0.56		128.61	97.0742	80.8029	60.4782	34.1991	18.3908	24.281	21.7241	19.2388	15.6471	16.0643	16.3889	15.2016	14.7368
Ecca	mudstone	Andersson et al. (2004)		41.9	80.6	9.56	34.9	7.4	1.3	5.93	0.99	5.71	1.13	3.62	0.63	3.45	0.6		114.169	84.2215	69.781	49.0858	32.0346	14.9425	19.3791	17.069	14.9869	13.2941	14.5382	17.5	13.9113	15.7895
Ecca	mudstone	Andersson et al. (2004)		42.6	80.8	9.82	38.1	6.9	1.3	6.13	0.95	5.71	1.16	3.36	0.51	2.87	0.48		116.076	84.4305	71.6788	53.5865	29.8701	14.9425	20.0327	16.3793	14.9869	13.6471	13.494	14.1667	11.5726	12.6316
Ecca	mudstone	Andersson et al. (2004)		40.6	76.9	9.37	36.9	6.7	1.4	6.24	1.04	5.44	1.15	3.25	0.51	3.29	0.45		110.627	80.3553	68.3942	51.8987	29.0043	16.092	20.3922	17.931	14.2782	13.5294	13.0522	14.1667	13.2661	11.8421
Ecca	mudstone	Andersson et al. (2004)		43.2	83.3	9.99	38	7.6	1.5	6.69	1.18	6.16	1.14	3.24	0.52	3.29	0.44		117.711	87.0428	72.9197	53.4459	32.9004	17.2414	21.8627	20.3448	16.168	13.4118	13.012	14.4444	13.2661	11.5789
Ecca	mudstone	Andersson et al. (2004)		49.1	93.9	11.11	42.3	8.8	1.5	6.87	1.22	6.41	1.23	3.72	0.59	3.75	0.56		133.787	98.1191	81.0949	59.4937	38.0952	17.2414	22.451	21.0345	16.8241	14.4706	14.9398	16.3889	15.121	14.7368
Ecca	mudstone	Andersson et al. (2004)		53.2	103.1	13.29	54.8	10.2	1.6	9.44	1.48	7.84	1.49	4.45	0.66	4.33	0.62		144.959	107.732	97.0073	77.0745	44.1558	18.3908	30.8497	25.5172	20.5774	17.5294	17.8715	18.3333	17.4597	16.3158
Ecca	mudstone	Andersson et al. (2004)		37.7	71.4	8.83	33.5	6.1	1.3	6.31	0.95	5.83	1.15	3.15	0.46	3.09	0.46		102.725	74.6082	64.4526	47.1167	26.4069	14.9425	20.6209	16.3793	15.3018	13.5294	12.6506	12.7778	12.4597	12.1053

## Sheet: Karoo volcanics
Group	Rock type	Reference	concentration [ppm]	La	Ce	Pr	Nd	Sm	Eu	Gd	Tb	Dy	Ho	Er	Tm	Yb	Lu	chondrite normalization	LaN	CeN	PrN	NdN	SmN	EuN	GdN	TbN	DyN	HoN	ErN	TmN	YbN	LuN
Golden Valley Sill Complex	dolerite sill	Galerne et al. (2008)	b.d.=below detection limit	15.6665	30.332	3.42	17.3	3.82	1.19212	3.66	0.6935	4.47	b.d.	2.55	0.38	2.67	0.36	McLennan et al. (1980)	42.688	31.6949	24.9635	24.3319	16.5368	13.7025	11.9608	11.9569	11.7323	-	10.241	10.5556	10.7661	9.47368
Golden Valley Sill Complex	dolerite sill	Galerne et al. (2008)		8.29	18.733	2.32	11.51	3.24	1.01646	2.83	0.6	3.32	b.d.	2.0952	0.297	2.03	0.32		22.5886	19.5747	16.9343	16.1885	14.026	11.6834	9.24837	10.3448	8.71391	-	8.41446	8.25	8.18548	8.42105
Golden Valley Sill Complex	dolerite sill	Galerne et al. (2008)		12.71	35.2	3.72	17.94	4.3	1.30234	3.89	0.77	4.02	b.d.	2.538	0.378	2.58	0.38		34.6322	36.7816	27.1533	25.2321	18.6147	14.9694	12.7124	13.2759	10.5512	-	10.1928	10.5	10.4032	10
Golden Valley Sill Complex	dolerite sill	Galerne et al. (2008)		9.55	21.417	2.53	12.95	3.22	1.02052	3.03	0.62	3.47	b.d.	2.0844	0.306	2.18	0.34		26.0218	22.3793	18.4672	18.2138	13.9394	11.7301	9.90196	10.6897	9.10761	-	8.37108	8.5	8.79032	8.94737
Golden Valley Sill Complex	dolerite sill	Galerne et al. (2008)		10.24	23.21	2.85	13.49	3.17	1.20244	3.28	0.64	3.71	b.d.	2.2248	0.324	2.39	0.34		27.9019	24.2529	20.8029	18.9733	13.7229	13.8211	10.719	11.0345	9.73753	-	8.93494	9	9.6371	8.94737
Golden Valley Sill Complex	dolerite sill	Galerne et al. (2008)		9.12	21.571	2.53	12.28	3.17	1.07049	3.03	0.63	3.58	b.d.	2.2356	0.324	2.19	0.32		24.8501	22.5402	18.4672	17.2714	13.7229	12.3045	9.90196	10.8621	9.39633	-	8.97831	9	8.83065	8.42105
Golden Valley Sill Complex	dolerite sill	Galerne et al. (2008)		6.82	15.334	1.93	9.91	2.73	0.960375	2.72	0.54	3.29	b.d.	1.944	0.252	1.99	0.31		18.5831	16.023	14.0876	13.9381	11.8182	11.0388	8.88889	9.31034	8.63517	-	7.80723	7	8.02419	8.15789
Golden Valley Sill Complex	dolerite sill	Galerne et al. (2008)		18.43	42.19	4.98	25.48	5.78	1.52	5.33	1.07	5.96	1.16	3.68	0.5	3.48	0.51		50.218	44.0857	36.3504	35.8368	25.0216	17.4713	17.4183	18.4483	15.643	13.6471	14.7791	13.8889	14.0323	13.4211
Golden Valley Sill Complex	dolerite sill	Galerne et al. (2008)		12.485	26.218	3.1	15.22	3.18	1.2133	3.56	0.646	3.98	b.d.	2.36	0.361	2.35	0.32		34.0191	27.396	22.6277	21.4065	13.7662	13.946	11.634	11.1379	10.4462	-	9.47791	10.0278	9.47581	8.42105
Golden Valley Sill Complex	dolerite sill	Galerne et al. (2008)		10.74	24.717	2.97	13.48	3.41	1.13492	3.28	0.68	3.88	b.d.	2.3652	0.36	2.28	0.33		29.2643	25.8276	21.6788	18.9592	14.7619	13.0451	10.719	11.7241	10.1837	-	9.4988	10	9.19355	8.68421
Golden Valley Sill Complex	dolerite sill	Galerne et al. (2008)		9.03	21.417	2.47	11.74	3.04	0.955724	2.87	0.61	3.34	b.d.	1.998	0.306	2.11	0.32		24.6049	22.3793	18.0292	16.512	13.1602	10.9853	9.37908	10.5172	8.7664	-	8.0241	8.5	8.50806	8.42105
Golden Valley Sill Complex	dolerite sill	Galerne et al. (2008)		11.67	24.68	3.08	14.34	3.62	1.089	3.65		4.1	b.d.	2.52	-	2.58	0.38		31.7984	25.7889	22.4818	20.1688	15.671	12.5172	11.9281	0	10.7612	-	10.1205	-	10.4032	10
Golden Valley Sill Complex	dolerite sill	Galerne et al. (2008)		9.566	21.279	2.63	13.81	3.66	1.11893	3.55	0.665	4.44	b.d.	2.44	0.3895	2.58	0.35		26.0654	22.2351	19.1971	19.4233	15.8442	12.8613	11.6013	11.4655	11.6535	-	9.7992	10.8194	10.4032	9.21053
Golden Valley Sill Complex	dolerite sill	Galerne et al. (2008)		13.6925	29.87	3.51	16.61	3.81	1.26087	3.56	0.7315	4.55	b.d.	2.58	0.3895	2.66	0.38		37.3093	31.2121	25.6204	23.3615	16.4935	14.4928	11.634	12.6121	11.9423	-	10.3614	10.8194	10.7258	10
Golden Valley Sill Complex	dolerite sill	Galerne et al. (2008)		12.4	26.69	3.2	14.87	3.82	1.1	3.69		4.03	0.89	2.4	-	2.59	0.39		33.7875	27.8892	23.3577	20.9142	16.5368	12.6437	12.0588	0	10.5774	10.4706	9.63855	-	10.4435	10.2632
Golden Valley Sill Complex	dolerite sill	Galerne et al. (2008)		11.14	25.894	3.09	14.75	3.63	1.18089	3.6	0.71	4.03	b.d.	2.7	0.351	2.59	0.37		30.3542	27.0575	22.5547	20.7454	15.7143	13.5734	11.7647	12.2414	10.5774	-	10.8434	9.75	10.4435	9.73684
Golden Valley Sill Complex	dolerite sill	Galerne et al. (2008)		11.34	24.45	3.04	14.47	3.96	1.001	3.48		3.9	0.84	2.43	-	2.55	0.38		30.8992	25.5486	22.1898	20.3516	17.1429	11.5057	11.3725	0	10.2362	9.88235	9.75904	-	10.2823	10
Golden Valley Sill Complex	dolerite sill	Galerne et al. (2008)		11.24	24.871	2.91	14.73	3.6	1.11742	3.5	0.72	4.03	b.d.	2.4516	0.342	2.43	0.35		30.6267	25.9885	21.2409	20.7173	15.5844	12.8439	11.4379	12.4138	10.5774	-	9.84578	9.5	9.79839	9.21053
Golden Valley Sill Complex	dolerite sill	Galerne et al. (2008)		11.69	25.85	3.08	15.51	3.99	1.32121	3.75	0.74	4.37	b.d.	2.4624	0.378	2.47	0.38		31.8529	27.0115	22.4818	21.8143	17.2727	15.1863	12.2549	12.7586	11.4698	-	9.88916	10.5	9.95968	10
Golden Valley Sill Complex	dolerite sill	Galerne et al. (2008)		11.71	24.65	2.99	14.63	3.72	1.012	3.52		4.07	b.d.	2.48	-	2.57	0.38		31.9074	25.7576	21.8248	20.5767	16.1039	11.6322	11.5033	0	10.6824	-	9.95984	-	10.3629	10
Golden Valley Sill Complex	dolerite sill	Galerne et al. (2008)		11.72	27.236	3.19	16.07	3.95	1.13772	3.82	0.75	4.48	b.d.	2.5596	0.36	2.48	0.36		31.9346	28.4598	23.2847	22.602	17.0996	13.0772	12.4837	12.931	11.7585	-	10.2795	10	10	9.47368
Golden Valley Sill Complex	dolerite sill	Galerne et al. (2008)		9.6	21.67	2.56	12.54	3.31	1.05398	3.26	0.64	3.75	b.d.	2.1492	0.306	2.27	0.37		26.158	22.6437	18.6861	17.6371	14.329	12.1147	10.6536	11.0345	9.84252	-	8.63133	8.5	9.15323	9.73684
Golden Valley Sill Complex	dolerite sill	Galerne et al. (2008)		12.02	27.032	3.28	16.7	4.1	1.30731	3.8	0.6555	4.44	b.d.	2.45	0.342	2.4	0.36		32.752	28.2466	23.9416	23.488	17.7489	15.0266	12.4183	11.3017	11.6535	-	9.83936	9.5	9.67742	9.47368
Golden Valley Sill Complex	dolerite sill	Galerne et al. (2008)		12.21	27.24	3.07	15.58	3.66	1.07	3.49	0.7	3.88	b.d.	2.38	0.36	2.51	0.39		33.2698	28.4639	22.4088	21.9128	15.8442	12.2989	11.4052	12.069	10.1837	-	9.55823	10	10.121	10.2632
Golden Valley Sill Complex	dolerite sill	Galerne et al. (2008)		12.5	29.276	3.43	16.03	3.84	1.26308	3.62	0.646	4.44	b.d.	2.38	0.38	2.44	0.4		34.0599	30.5914	25.0365	22.5457	16.6234	14.5182	11.8301	11.1379	11.6535	-	9.55823	10.5556	9.83871	10.5263
Golden Valley Sill Complex	dolerite sill	Galerne et al. (2008)		6.89	15.152	1.95	10.15	2.84	0.9589	2.71	0.5225	3.45	b.d.	2.12	0.323	2.13	0.31		18.7738	15.8328	14.2336	14.2757	12.2944	11.0218	8.85621	9.00862	9.05512	-	8.51406	8.97222	8.58871	8.15789
Golden Valley Sill Complex	dolerite sill	Galerne et al. (2008)		12.32	26.03	3.21	15.13	4.16	1.089	3.82		4.39	b.d.	2.58	-	2.76	0.41		33.5695	27.1996	23.4307	21.2799	18.0087	12.5172	12.4837	0	11.5223	-	10.3614	-	11.129	10.7895
Golden Valley Sill Complex	dolerite sill	Galerne et al. (2008)		10.385	22.621	2.67	13.05	3.08	1.07361	2.82	0.57	3.63	b.d.	1.96	0.304	2.04	0.32		28.297	23.6374	19.4891	18.3544	13.3333	12.3403	9.21569	9.82759	9.52756	-	7.87149	8.44444	8.22581	8.42105
Golden Valley Sill Complex	dolerite sill	Galerne et al. (2008)		7.8	16.79	2.13	10.62	3.21	0.891	3.06		3.72	b.d.	2.15	-	2.22	0.34		21.2534	17.5444	15.5474	14.9367	13.8961	10.2414	10	0	9.76378	-	8.63454	-	8.95161	8.94737
Golden Valley Sill Complex	dolerite sill	Galerne et al. (2008)		12.86	29.04	3.32	16.65	4.37	1.24418	3.76	0.75	4.83	b.d.	2.9484	0.387	2.79	0.42		35.0409	30.3448	24.2336	23.4177	18.9177	14.3009	12.2876	12.931	12.6772	-	11.841	10.75	11.25	11.0526
Golden Valley Sill Complex	dolerite sill	Galerne et al. (2008)		10.71	24.211	2.85	13.85	3.34	1.16275	3.17	0.71	3.85	b.d.	2.3436	0.288	2.19	0.33		29.1826	25.2989	20.8029	19.4796	14.4589	13.3649	10.3595	12.2414	10.105	-	9.41205	8	8.83065	8.68421
Golden Valley Sill Complex	dolerite sill	Galerne et al. (2008)		21.27	48.394	5.61	27.43	6.41	1.66916	5.98	1.121	6.97	1.37	3.38	0.5795	3.53	0.53		57.9564	50.5684	40.9489	38.5795	27.7489	19.1857	19.5425	19.3276	18.294	16.1176	13.5743	16.0972	14.2339	13.9474
Golden Valley Sill Complex	dolerite sill	Galerne et al. (2008)		6.77	16.109	1.97	9.91	2.94	0.889724	2.57	0.5415	3.55	b.d.	1.76	0.2755	1.82	0.32		18.4469	16.8328	14.3796	13.9381	12.7273	10.2267	8.39869	9.33621	9.31759	-	7.06827	7.65278	7.33871	8.42105
Golden Valley Sill Complex	dolerite sill	Galerne et al. (2008)		11.7	24.93	2.99	14.31	3.79	1.067	3.29		4.04	0.85	2.49	-	2.56	0.37		31.8801	26.0502	21.8248	20.1266	16.4069	12.2644	10.7516	0	10.6037	10	10	-	10.3226	9.73684
Golden Valley Sill Complex	dolerite sill	Galerne et al. (2008)		11.8235	25.283	2.9	14.78	3.97	1.12983	3.3	0.627	4.16	b.d.	2.27	0.3515	2.37	0.36		32.2166	26.419	21.1679	20.7876	17.1861	12.9866	10.7843	10.8103	10.9186	-	9.11647	9.76389	9.55645	9.47368
Golden Valley Sill Complex	dolerite sill	Galerne et al. (2008)		11.06	25.355	2.96	15.2	3.61	1.25217	3.19	0.69	3.96	b.d.	2.4732	0.342	2.42	0.34		30.1362	26.4943	21.6058	21.3783	15.6277	14.3928	10.4248	11.8966	10.3937	-	9.93253	9.5	9.75806	8.94737
Golden Valley Sill Complex	dolerite sill	Galerne et al. (2008)		10.87	25.597	2.93	15	3.63	1.12602	3.48	0.68	4	b.d.	2.4516	0.342	2.3	0.38		29.6185	26.7471	21.3869	21.097	15.7143	12.9428	11.3725	11.7241	10.4987	-	9.84578	9.5	9.27419	10
Golden Valley Sill Complex	dolerite sill	Galerne et al. (2008)		9.36	21.67	2.6	13.02	3	1.00877	2.97	0.6	3.36	b.d.	2.214	0.306	2.22	0.32		25.5041	22.6437	18.9781	18.3122	12.987	11.5951	9.70588	10.3448	8.8189	-	8.89157	8.5	8.95161	8.42105
Golden Valley Sill Complex	dolerite sill	Galerne et al. (2008)		10.79	24.645	2.92	14.51	3.63	1.10269	3.39	0.646	4.19	b.d.	2.44	0.3895	2.48	0.36		29.4005	25.7524	21.3139	20.4079	15.7143	12.6746	11.0784	11.1379	10.9974	-	9.7992	10.8194	10	9.47368
Golden Valley Sill Complex	dolerite sill	Galerne et al. (2008)		10.94	24.849	2.9	14.34	3.49	1.23799	3.56	0.71	4.06	b.d.	2.4732	0.36	2.3	0.32		29.8093	25.9655	21.1679	20.1688	15.1082	14.2298	11.634	12.2414	10.6562	-	9.93253	10	9.27419	8.42105
Golden Valley Sill Complex	dolerite sill	Galerne et al. (2008)		10.77	24.981	2.76	13.68	3.39	1.09343	3.08	0.69	4.02	b.d.	2.2788	0.342	2.29	0.35		29.346	26.1034	20.146	19.2405	14.6753	12.5682	10.0654	11.8966	10.5512	-	9.15181	9.5	9.23387	9.21053
Golden Valley Sill Complex	dolerite sill	Galerne et al. (2008)		7.94	18.161	2.06	10.72	3.02	1.02982	2.85	0.6	3.43	b.d.	2.052	0.288	1.95	0.3		21.6349	18.977	15.0365	15.0774	13.0736	11.837	9.31373	10.3448	9.00262	-	8.24096	8	7.8629	7.89474
Golden Valley Sill Complex	dolerite sill	Galerne et al. (2008)		6.86	15.752	1.95	10.15	2.89	1.03914	2.77	0.55	3.46	b.d.	1.944	0.261	2.09	0.3		18.6921	16.4598	14.2336	14.2757	12.5108	11.9441	9.05229	9.48276	9.08136	-	7.80723	7.25	8.42742	7.89474
Golden Valley Sill Complex	dolerite sill	Galerne et al. (2008)		10.53	24.31	3.05	13.82	3.69	1.07218	3.11	0.61	3.82	b.d.	2.2032	0.315	2.15	0.33		28.6921	25.4023	22.2628	19.4374	15.974	12.3239	10.1634	10.5172	10.0262	-	8.84819	8.75	8.66935	8.68421
Golden Valley Sill Complex	dolerite sill	Galerne et al. (2008)		12.4	26.3	3.3	14.97	3.72	1.067	3.46		4.04	0.88	2.39	-	2.48	0.37		33.7875	27.4817	24.0876	21.0549	16.1039	12.2644	11.3072	0	10.6037	10.3529	9.59839	-	10	9.73684
Golden Valley Sill Complex	dolerite sill	Galerne et al. (2008)		11	24.36	3.03	13.87	3.71	0.968	3.53		3.91	0.9	2.34	-	2.41	0.38		29.9728	25.4545	22.1168	19.5077	16.0606	11.1264	11.5359	0	10.2625	10.5882	9.39759	-	9.71774	10
Golden Valley Sill Complex	dolerite sill	Galerne et al. (2008)		10.8575	22.599	2.58	13.39	3.23	1.13273	3.19	0.608	3.88	b.d.	2.17	0.342	2.43	0.35		29.5845	23.6144	18.8321	18.8326	13.9827	13.0199	10.4248	10.4828	10.1837	-	8.71486	9.5	9.79839	9.21053
Golden Valley Sill Complex	dolerite sill	Galerne et al. (2008)		11.59	24.71	3	14.09	3.66	1.056	3.32		3.83	0.86	2.43	-	2.51	0.36		31.5804	25.8203	21.8978	19.8172	15.8442	12.1379	10.8497	0	10.0525	10.1176	9.75904	-	10.121	9.47368
Golden Valley Sill Complex	dolerite sill	Galerne et al. (2008)		12.3	28.105	3.37	16.98	4.14	1.33712	3.8	0.8	4.54	b.d.	2.5812	0.351	2.56	0.37		33.515	29.3678	24.5985	23.8819	17.9221	15.3692	12.4183	13.7931	11.916	-	10.3663	9.75	10.3226	9.73684
Golden Valley Sill Complex	dolerite sill	Galerne et al. (2008)		9.24	21.263	2.58	13.87	3.81	1.32078	4	0.72	4.29	b.d.	2.8296	0.396	2.77	0.43		25.1771	22.2184	18.8321	19.5077	16.4935	15.1814	13.0719	12.4138	11.2598	-	11.3639	11	11.1694	11.3158
Golden Valley Sill Complex	dolerite sill	Galerne et al. (2008)		8.82	20.262	2.44	11.69	2.83	0.932586	2.72	0.53	3.4	0.65	2.052	0.297	2.11	0.28		24.0327	21.1724	17.8102	16.4416	12.2511	10.7194	8.88889	9.13793	8.92388	7.64706	8.24096	8.25	8.50806	7.36842
Golden Valley Sill Complex	dolerite sill	Galerne et al. (2008)		13.33	30.041	3.51	17.19	4.49	1.25731	4.24	0.82	5.08	1.03	2.916	0.414	2.88	0.44		36.3215	31.3908	25.6204	24.1772	19.4372	14.4518	13.8562	14.1379	13.3333	12.1176	11.7108	11.5	11.6129	11.5789
Golden Valley Sill Complex	dolerite sill	Galerne et al. (2008)		11.31	25.168	2.9	14.73	3.58	1.18738	3.32	0.67	3.84	b.d.	2.322	0.333	2.35	0.36		30.8174	26.2989	21.1679	20.7173	15.4978	13.648	10.8497	11.5517	10.0787	-	9.3253	9.25	9.47581	9.47368
Golden Valley Sill Complex	dolerite sill	Galerne et al. (2008)		6.99	15.983	1.93	10.07	2.81	0.960354	2.88	0.55	3.54	b.d.	1.9764	0.306	2.17	0.31		19.0463	16.7011	14.0876	14.1632	12.1645	11.0386	9.41176	9.48276	9.29134	-	7.93735	8.5	8.75	8.15789
Golden Valley Sill Complex	dolerite sill	Galerne et al. (2008)		9.19	20.922	2.44	12.3	3.02	0.995155	2.81	0.6	3.54	b.d.	2.052	0.279	2.08	0.29		25.0409	21.8621	17.8102	17.2996	13.0736	11.4386	9.18301	10.3448	9.29134	-	8.24096	7.75	8.3871	7.63158
Golden Valley Sill Complex	dolerite sill	Galerne et al. (2008)		11.45	25.927	3.11	15.88	3.97	1.3041	3.79	0.75	4.62	b.d.	2.9376	0.396	2.79	0.41		31.1989	27.092	22.7007	22.3347	17.1861	14.9897	12.3856	12.931	12.126	-	11.7976	11	11.25	10.7895
Golden Valley Sill Complex	dolerite sill	Galerne et al. (2008)		13.304	27.769	3.44	16.7	3.73	1.21099	3.73	0.6935	4.33	b.d.	2.41	0.38	2.47	0.37		36.2507	29.0167	25.1095	23.488	16.1472	13.9194	12.1895	11.9569	11.3648	-	9.67871	10.5556	9.95968	9.73684
Golden Valley Sill Complex	dolerite sill	Galerne et al. (2008)		10.99	24.376	2.88	13.97	3.66	1.05278	3.31	0.7	3.95	b.d.	2.4192	0.369	2.5	0.34		29.9455	25.4713	21.0219	19.6484	15.8442	12.1009	10.817	12.069	10.3675	-	9.71566	10.25	10.0806	8.94737
Golden Valley Sill Complex	dolerite sill	Galerne et al. (2008)		11.55	26.482	3.16	15.74	4.06	1.1143	3.87	0.665	4.43	b.d.	2.32	0.38	2.55	0.37		31.4714	27.6719	23.0657	22.1378	17.5758	12.808	12.6471	11.4655	11.6273	-	9.31727	10.5556	10.2823	9.73684
Golden Valley Sill Complex	dolerite sill	Galerne et al. (2008)		10.56	24.211	2.75	13.92	3.76	1.14776	3.24	0.67	3.78	b.d.	2.2896	0.324	2.41	0.35		28.7738	25.2989	20.073	19.5781	16.2771	13.1926	10.5882	11.5517	9.92126	-	9.19518	9	9.71774	9.21053
Golden Valley Sill Complex	dolerite sill	Galerne et al. (2008)		5.3	11.32	1.39	7	2.03	0.792	2.1		2.6	b.d.	1.53	-	1.51	0.23		14.4414	11.8286	10.146	9.84529	8.78788	9.10345	6.86275	0	6.82415	-	6.14458	-	6.08871	6.05263
Golden Valley Sill Complex	dolerite sill	Galerne et al. (2008)		9.24	21.609	2.62	12.86	3.3	0.929546	2.87	0.5415	3.5	b.d.	1.89	0.2945	1.96	0.31		25.1771	22.5799	19.1241	18.0872	14.2857	10.6844	9.37908	9.33621	9.18635	-	7.59036	8.18056	7.90323	8.15789
Golden Valley Sill Complex	dolerite sill	Galerne et al. (2008)		10.595	23.71	2.89	13.75	3.43	1.15733	3.19	0.646	3.92	b.d.	2.2	0.3325	2.16	0.37		28.8692	24.7753	21.0949	19.339	14.8485	13.3026	10.4248	11.1379	10.2887	-	8.83534	9.23611	8.70968	9.73684
Golden Valley Sill Complex	dolerite sill	Galerne et al. (2008)		10.04	23.529	2.68	13.39	3.08	1.04432	3.17	0.65	3.55	b.d.	2.322	0.306	2.04	0.34		27.3569	24.5862	19.562	18.8326	13.3333	12.0037	10.3595	11.2069	9.31759	-	9.3253	8.5	8.22581	8.94737
Golden Valley Sill Complex	dolerite sill	Galerne et al. (2008)		8.45	19.118	2.22	11.23	2.89	0.989019	2.75	0.58	3.33	b.d.	2.1708	0.279	2.03	0.31		23.0245	19.977	16.2044	15.7947	12.5108	11.368	8.98693	10	8.74016	-	8.71807	7.75	8.18548	8.15789
Golden Valley Sill Complex	dolerite sill	Galerne et al. (2008)		10.48	23.551	2.71	13.58	3.07	1.13633	3.36	0.65	3.74	b.d.	2.3436	0.288	2.25	0.31		28.5559	24.6092	19.781	19.0999	13.29	13.0613	10.9804	11.2069	9.81627	-	9.41205	8	9.07258	8.15789
Golden Valley Sill Complex	dolerite sill	Galerne et al. (2008)		7.98	17.946	2.34	12.48	3.04	1.10415	3.18	0.627	3.98	b.d.	2.15	0.3325	2.17	0.32		21.7439	18.7524	17.0803	17.5527	13.1602	12.6914	10.3922	10.8103	10.4462	-	8.63454	9.23611	8.75	8.42105
Golden Valley Sill Complex	dolerite sill	Galerne et al. (2008)		7.28	16.252	2.11	11.19	2.9	0.913566	3.07	0.5415	3.79	b.d.	2.08	0.3325	1.99	0.31		19.8365	16.9822	15.4015	15.7384	12.5541	10.5008	10.0327	9.33621	9.94751	-	8.35341	9.23611	8.02419	8.15789
Golden Valley Sill Complex	dolerite sill	Galerne et al. (2008)		14.44	30.07	3.76	17.36	4.42	1.199	4.27		4.71	1.07	2.88	-	3.06	0.46		39.346	31.4211	27.4453	24.4163	19.1342	13.7816	13.9542	0	12.3622	12.5882	11.5663	-	12.3387	12.1053
Golden Valley Sill Complex	dolerite sill	Galerne et al. (2008)		11.9075	24.821	2.87	15.16	3.61	1.11393	3.4	0.6175	4.25	b.d.	2.16	0.342	2.27	0.35		32.4455	25.9363	20.9489	21.3221	15.6277	12.8038	11.1111	10.6466	11.1549	-	8.6747	9.5	9.15323	9.21053
Golden Valley Sill Complex	dolerite sill	Galerne et al. (2008)		10.07	22.583	2.73	13.28	3.22	1.09608	3.03	0.62	3.56	b.d.	2.2572	0.306	2.26	0.33		27.4387	23.5977	19.927	18.6779	13.9394	12.5986	9.90196	10.6897	9.34383	-	9.06506	8.5	9.1129	8.68421
Golden Valley Sill Complex	dolerite sill	Galerne et al. (2008)		6.55	15.262	1.86	10.27	2.61	0.941084	2.69	0.4845	3.31	b.d.	1.97	0.285	1.87	0.26		17.8474	15.9478	13.5766	14.4444	11.2987	10.8171	8.79085	8.35345	8.68766	-	7.91165	7.91667	7.54032	6.84211
Golden Valley Sill Complex	dolerite sill	Galerne et al. (2008)		11.14	24.794	2.88	14.35	3.76	1.11636	3.35	0.7	4.07	b.d.	2.3652	0.333	2.37	0.37		30.3542	25.908	21.0219	20.1828	16.2771	12.8317	10.9477	12.069	10.6824	-	9.4988	9.25	9.55645	9.73684
Golden Valley Sill Complex	dolerite sill	Galerne et al. (2008)		9.3875	20.377	2.66	13.39	3.75	1.11117	3.39	0.665	4.31	b.d.	2.41	0.361	2.54	0.36		25.579	21.2926	19.4161	18.8326	16.2338	12.7721	11.0784	11.4655	11.3123	-	9.67871	10.0278	10.2419	9.47368
Golden Valley Sill Complex	dolerite sill	Galerne et al. (2008)		10.133	22.632	2.75	13.92	3.76	1.17502	3.68	0.7315	4.42	1.02	2.54	0.4085	2.7	0.38		27.6104	23.6489	20.073	19.5781	16.2771	13.506	12.0261	12.6121	11.601	12	10.2008	11.3472	10.8871	10
Golden Valley Sill Complex	dolerite sill	Galerne et al. (2008)		12.821	26.823	3.15	15.16	3.75	1.16657	3.59	0.646	4.45	b.d.	2.38	0.3705	2.4	0.37		34.9346	28.0282	22.9927	21.3221	16.2338	13.4089	11.732	11.1379	11.6798	-	9.55823	10.2917	9.67742	9.73684
Golden Valley Sill Complex	dolerite sill	Galerne et al. (2008)		7.82	16.86	2.07	10.36	2.89	0.891	3.01		3.58	b.d.	2.13	-	2.07	0.34		21.3079	17.6176	15.1095	14.571	12.5108	10.2414	9.8366	0	9.39633	-	8.55422	-	8.34677	8.94737
Golden Valley Sill Complex	dolerite sill	Galerne et al. (2008)		8.26	18.1	2.35	11.68	3.16	0.913	3.08		3.73	b.d.	2.21	-	2.25	0.35		22.5068	18.9133	17.1533	16.4276	13.6797	10.4943	10.0654	0	9.79003	-	8.8755	-	9.07258	9.21053
Golden Valley Sill Complex	dolerite sill	Galerne et al. (2008)		8.18	17.96	2.25	10.73	2.87	0.913	3.02		3.73	b.d.	2.26	-	2.28	0.36		22.2888	18.767	16.4234	15.0914	12.4242	10.4943	9.86928	0	9.79003	-	9.07631	-	9.19355	9.47368
Golden Valley Sill Complex	dolerite sill	Galerne et al. (2008)		7.8	16.978	2.11	10.8	3.19	1.04845	2.99	0.5605	3.82	b.d.	2.02	0.3135	2.13	0.31		21.2534	17.7409	15.4015	15.1899	13.8095	12.0511	9.77124	9.66379	10.0262	-	8.11245	8.70833	8.58871	8.15789
Golden Valley Sill Complex	dolerite sill	Galerne et al. (2008)		12.17	27.505	3.34	16.89	3.82	1.31866	3.59	0.7505	4.56	b.d.	2.49	0.399	2.53	0.39		33.1608	28.7409	24.3796	23.7553	16.5368	15.157	11.732	12.9397	11.9685	-	10	11.0833	10.2016	10.2632
Golden Valley Sill Complex	dolerite sill	Galerne et al. (2008)		9.97	22.44	2.6	12.39	3.15	1.03964	3.11	0.62	3.57	b.d.	2.2788	0.324	2.25	0.34		27.1662	23.4483	18.9781	17.4262	13.6364	11.9499	10.1634	10.6897	9.37008	-	9.15181	9	9.07258	8.94737
Golden Valley Sill Complex	dolerite sill	Galerne et al. (2008)		9.4	21.549	2.62	13.22	3.31	1.00655	3.02	0.61	3.6	b.d.	2.1708	0.315	2.21	0.33		25.6131	22.5172	19.1241	18.5935	14.329	11.5695	9.86928	10.5172	9.44882	-	8.71807	8.75	8.91129	8.68421
Golden Valley Sill Complex	dolerite sill	Galerne et al. (2008)		8.74	19.954	2.39	11.61	2.89	1.03531	2.91	0.58	3.36	b.d.	2.1708	0.306	1.99	0.28		23.8147	20.8506	17.4453	16.3291	12.5108	11.9001	9.5098	10	8.8189	-	8.71807	8.5	8.02419	7.36842
Golden Valley Sill Complex	dolerite sill	Galerne et al. (2008)		11.85	27.12	3.23	16.72	3.79	1.34484	3.56	0.6365	4.38	b.d.	2.53	0.399	2.47	0.41		32.2888	28.3386	23.5766	23.5162	16.4069	15.4579	11.634	10.9741	11.4961	-	10.1606	11.0833	9.95968	10.7895
Golden Valley Sill Complex	dolerite sill	Galerne et al. (2008)		9.25	20.63	2.61	12.74	3.89	1.10165	3.18	0.5985	4.12	b.d.	2.13	0.304	2.26	0.32		25.2044	21.5569	19.0511	17.9184	16.8398	12.6626	10.3922	10.319	10.8136	-	8.55422	8.44444	9.1129	8.42105
Golden Valley Sill Complex	dolerite sill	Galerne et al. (2008)		13	27.46	3.31	15.28	4.1	1.1	3.75		4.24	b.d.	2.48	-	2.57	0.37		35.4223	28.6938	24.1606	21.4909	17.7489	12.6437	12.2549	0	11.1286	-	9.95984	-	10.3629	9.73684
Golden Valley Sill Complex	dolerite sill	Galerne et al. (2008)		11.29	23.86	2.89	13.73	3.4	1.001	3.35		3.75	0.83	2.24	-	2.39	0.37		30.7629	24.9321	21.0949	19.3108	14.7186	11.5057	10.9477	0	9.84252	9.76471	8.99598	-	9.6371	9.73684
Golden Valley Sill Complex	dolerite sill	Galerne et al. (2008)		12.02	27.137	3.1	15.06	3.91	1.21156	3.39	0.69	3.86	b.d.	2.4624	0.324	5.06	0.38		32.752	28.3563	22.6277	21.1814	16.9264	13.926	11.0784	11.8966	10.1312	-	9.88916	9	20.4032	10
Golden Valley Sill Complex	dolerite sill	Galerne et al. (2008)		9.944	21.708	2.53	12.78	2.79	1.07298	2.81	0.5605	3.62	b.d.	1.94	0.304	2.04	0.34		27.0954	22.6834	18.4672	17.9747	12.0779	12.3331	9.18301	9.66379	9.50131	-	7.79116	8.44444	8.22581	8.94737
Golden Valley Sill Complex	dolerite sill	Galerne et al. (2008)		9.63	21.472	2.52	12.46	3.66	1.07397	2.92	0.63	3.41	b.d.	2.2032	0.306	2	0.32		26.2398	22.4368	18.3942	17.5246	15.8442	12.3445	9.54248	10.8621	8.95013	-	8.84819	8.5	8.06452	8.42105
Golden Valley Sill Complex	dolerite sill	Galerne et al. (2008)		11.39	25.971	3.03	14.86	3.78	1.21382	3.4	0.69	3.78	b.d.	2.4516	0.351	2.26	0.39		31.0354	27.1379	22.1168	20.9001	16.3636	13.952	11.1111	11.8966	9.92126	-	9.84578	9.75	9.1129	10.2632
Golden Valley Sill Complex	dolerite sill	Galerne et al. (2008)		9.29	21.263	2.54	14.35	3.88	1.17504	3.86	0.78	4.37	b.d.	2.6676	0.387	2.69	0.42		25.3134	22.2184	18.5401	20.1828	16.7965	13.5062	12.6144	13.4483	11.4698	-	10.7133	10.75	10.8468	11.0526
Golden Valley Sill Complex	dolerite sill	Galerne et al. (2008)		7.63	16.4	2.02	10.23	2.86	0.913	2.9		3.53	b.d.	2.13	-	2.07	0.31		20.7902	17.1369	14.7445	14.3882	12.381	10.4943	9.47712	0	9.26509	-	8.55422	-	8.34677	8.15789
Golden Valley Sill Complex	dolerite sill	Galerne et al. (2008)		8.89	20.839	2.43	12.43	2.76	1.00989	2.89	0.4845	3.21	b.d.	1.66	0.2755	1.77	0.26		24.2234	21.7753	17.7372	17.4824	11.9481	11.6079	9.44444	8.35345	8.4252	-	6.66667	7.65278	7.1371	6.84211
Golden Valley Sill Complex	dolerite sill	Galerne et al. (2008)		8.96	20.658	2.46	11.97	3.39	0.955838	2.87	0.6	3.35	b.d.	1.9764	0.27	2.1	0.32		24.4142	21.5862	17.9562	16.8354	14.6753	10.9866	9.37908	10.3448	8.79265	-	7.93735	7.5	8.46774	8.42105
Golden Valley Sill Complex	dolerite sill	Galerne et al. (2008)		6.88	15.895	2.01	10.69	2.98	1.06378	2.85	0.57	3.21	b.d.	2.1384	0.288	2.13	0.29		18.7466	16.6092	14.6715	15.0352	12.9004	12.2274	9.31373	9.82759	8.4252	-	8.58795	8	8.58871	7.63158
Golden Valley Sill Complex	dolerite sill	Galerne et al. (2008)		10.75	24.442	2.88	15.33	3.44	1.14796	3.27	0.66	3.72	b.d.	2.3004	0.351	2.4	0.36		29.2916	25.5402	21.0219	21.5612	14.8918	13.1949	10.6863	11.3793	9.76378	-	9.23855	9.75	9.67742	9.47368
Golden Valley Sill Complex	dolerite sill	Galerne et al. (2008)		13.22	28.385	3.29	15.78	3.8	1.13775	3.33	0.665	4.31	b.d.	2.42	0.3705	2.49	0.39		36.0218	29.6604	24.0146	22.1941	16.4502	13.0776	10.8824	11.4655	11.3123	-	9.71888	10.2917	10.0403	10.2632
Golden Valley Sill Complex	dolerite sill	Galerne et al. (2008)		10.56	23.958	2.85	14.36	3.32	1.11274	3.45	0.67	3.82	b.d.	2.3868	0.315	2.34	0.35		28.7738	25.0345	20.8029	20.1969	14.3723	12.7901	11.2745	11.5517	10.0262	-	9.58554	8.75	9.43548	9.21053
Golden Valley Sill Complex	dolerite sill	Galerne et al. (2008)		12.76	27.929	3.17	16.38	4.02	1.24343	3.82	0.74	4.35	b.d.	2.7756	0.405	2.78	0.44		34.7684	29.1839	23.1387	23.038	17.4026	14.2923	12.4837	12.7586	11.4173	-	11.147	11.25	11.2097	11.5789
Golden Valley Sill Complex	dolerite sill	Galerne et al. (2008)		10.21	23.193	2.84	13.61	3.39	1.08252	3.26	0.5985	3.82	b.d.	2.18	0.3515	2.22	0.34		27.8202	24.2351	20.7299	19.1421	14.6753	12.4428	10.6536	10.319	10.0262	-	8.75502	9.76389	8.95161	8.94737
Golden Valley Sill Complex	dolerite sill	Galerne et al. (2008)		6.72	15.169	1.87	9.73	2.76	0.882406	2.87	0.58	3.38	b.d.	2.0304	0.288	2.01	0.3		18.3106	15.8506	13.6496	13.685	11.9481	10.1426	9.37908	10	8.87139	-	8.15422	8	8.10484	7.89474
Golden Valley Sill Complex	dolerite sill	Galerne et al. (2008)		8.78	20.768	2.36	11.45	3.14	0.983031	3.01	0.55	3.36	b.d.	2.1168	0.279	2.01	0.3		23.9237	21.7011	17.2263	16.1041	13.5931	11.2992	9.8366	9.48276	8.8189	-	8.5012	7.75	8.10484	7.89474
Golden Valley Sill Complex	dolerite sill	Galerne et al. (2008)		11.37	26.015	3.05	15.29	3.59	1.13245	3.36	0.67	3.91	b.d.	2.3868	0.333	2.21	0.33		30.9809	27.1839	22.2628	21.5049	15.5411	13.0167	10.9804	11.5517	10.2625	-	9.58554	9.25	8.91129	8.68421
Golden Valley Sill Complex	dolerite sill	Galerne et al. (2008)		11.18	25.85	3.1	14.79	3.91	1.21199	3.34	0.71	4.1	b.d.	2.484	0.342	2.41	0.38		30.4632	27.0115	22.6277	20.8017	16.9264	13.9309	10.915	12.2414	10.7612	-	9.9759	9.5	9.71774	10
Golden Valley Sill Complex	dolerite sill	Galerne et al. (2008)		7.18	16.885	2.07	10.76	3.03	1.00246	3.02	0.61	3.68	b.d.	2.1168	0.306	2.28	0.3		19.564	17.6437	15.1095	15.1336	13.1169	11.5225	9.86928	10.5172	9.65879	-	8.5012	8.5	9.19355	7.89474
Golden Valley Sill Complex	dolerite sill	Galerne et al. (2008)		11.04	25.652	3.02	14.52	3.56	1.18961	3.52	0.7	3.76	b.d.	2.4732	0.342	2.39	0.37		30.0817	26.8046	22.0438	20.4219	15.4113	13.6737	11.5033	12.069	9.86877	-	9.93253	9.5	9.6371	9.73684
Golden Valley Sill Complex	dolerite sill	Galerne et al. (2008)		10.9	25.476	3	14.35	3.42	1.11215	3.45	0.7	3.99	b.d.	2.484	0.324	2.38	0.35		29.7003	26.6207	21.8978	20.1828	14.8052	12.7833	11.2745	12.069	10.4724	-	9.9759	9	9.59677	9.21053
Golden Valley Sill Complex	dolerite sill	Galerne et al. (2008)		7.79	16.52	2.03	9.9	2.95	0.902	2.97		3.45	b.d.	2.09	-	2.01	0.3		21.2262	17.2623	14.8175	13.9241	12.7706	10.3678	9.70588	0	9.05512	-	8.39357	-	8.10484	7.89474
Golden Valley Sill Complex	dolerite sill	Galerne et al. (2008)		11.62	26.13	3.11	14.93	3.73	1.11	3.62	0.73	4.1	b.d.	2.6	0.35	2.39	0.36		31.6621	27.3041	22.7007	20.9986	16.1472	12.7586	11.8301	12.5862	10.7612	-	10.4418	9.72222	9.6371	9.47368
Golden Valley Sill Complex	dolerite sill	Galerne et al. (2008)		9.63	22.077	2.59	12.5	3.19	0.981908	3.04	0.6	3.51	b.d.	2.1384	0.288	2.23	0.32		26.2398	23.069	18.9051	17.5809	13.8095	11.2863	9.93464	10.3448	9.2126	-	8.58795	8	8.99194	8.42105
Golden Valley Sill Complex	dolerite sill	Galerne et al. (2008)		8.93	19.415	2.3	11.68	2.94	0.890659	2.54	0.56	3.16	b.d.	1.9872	0.261	2	0.3		24.3324	20.2874	16.7883	16.4276	12.7273	10.2375	8.30065	9.65517	8.29396	-	7.98072	7.25	8.06452	7.89474
Golden Valley Sill Complex	dolerite sill	Galerne et al. (2008)		11.22	25.52	3.11	15.09	3.95	1.21336	3.54	0.73	4.02	b.d.	2.4084	0.342	2.42	0.36		30.5722	26.6667	22.7007	21.2236	17.0996	13.9467	11.5686	12.5862	10.5512	-	9.67229	9.5	9.75806	9.47368
Golden Valley Sill Complex	dolerite sill	Galerne et al. (2008)		11.38	25.52	2.97	15.61	3.66	1.15929	3.53	0.69	4.15	b.d.	2.4948	0.342	2.5	0.39		31.0082	26.6667	21.6788	21.955	15.8442	13.3252	11.5359	11.8966	10.8924	-	10.0193	9.5	10.0806	10.2632
Golden Valley Sill Complex	dolerite sill	Galerne et al. (2008)		6.7	15.631	1.94	10.14	2.77	1.00043	2.85	0.59	3.59	b.d.	2.214	0.288	2.09	0.31		18.2561	16.3333	14.1606	14.2616	11.9913	11.4992	9.31373	10.1724	9.42257	-	8.89157	8	8.42742	8.15789
Golden Valley Sill Complex	dolerite sill	Galerne et al. (2008)		11.162	24.458	3.04	14.71	3.7	1.04657	3.47	0.684	4	b.d.	2.34	0.3515	2.25	0.34		30.4142	25.5569	22.1898	20.6892	16.0173	12.0295	11.3399	11.7931	10.4987	-	9.39759	9.76389	9.07258	8.94737
Golden Valley Sill Complex	dolerite sill	Galerne et al. (2008)		7.73	16.555	2.01	11.22	2.9	1.04976	2.92	0.63	3.43	b.d.	2.1492	0.324	2.18	0.33		21.0627	17.2989	14.6715	15.7806	12.5541	12.0662	9.54248	10.8621	9.00262	-	8.63133	9	8.79032	8.68421
Golden Valley Sill Complex	dolerite sill	Galerne et al. (2008)		8.8	21.043	2.51	12.12	3.67	1.21479	3.23	0.71	4.33	b.d.	2.538	0.378	2.62	0.39		23.9782	21.9885	18.3212	17.0464	15.8874	13.9631	10.5556	12.2414	11.3648	-	10.1928	10.5	10.5645	10.2632
Golden Valley Sill Complex	dolerite sill	Galerne et al. (2008)		9.27	21.186	2.53	11.88	3.16	0.969098	2.8	0.55	3.49	b.d.	2.0844	0.297	2.11	0.31		25.2589	22.1379	18.4672	16.7089	13.6797	11.1391	9.15033	9.48276	9.1601	-	8.37108	8.25	8.50806	8.15789
Golden Valley Sill Complex	dolerite sill	Galerne et al. (2008)		12.02	26.521	3.21	14.96	4.08	1.22832	3.81	0.72	4.13	b.d.	2.538	0.36	2.47	0.34		32.752	27.7126	23.4307	21.0408	17.6623	14.1186	12.451	12.4138	10.8399	-	10.1928	10	9.95968	8.94737
Golden Valley Sill Complex	dolerite sill	Galerne et al. (2008)		11.03	25.63	3.08	15.37	3.49	1.13203	3.65	0.66	3.91	b.d.	2.4732	0.351	2.4	0.36		30.0545	26.7816	22.4818	21.6174	15.1082	13.0118	11.9281	11.3793	10.2625	-	9.93253	9.75	9.67742	9.47368
Golden Valley Sill Complex	dolerite sill	Galerne et al. (2008)		6.96	15.224	1.83	9.87	2.71	1.08995	2.69	0.59	3.21	b.d.	1.944	0.27	2.02	0.31		18.9646	15.908	13.3577	13.8819	11.7316	12.5282	8.79085	10.1724	8.4252	-	7.80723	7.5	8.14516	8.15789
Golden Valley Sill Complex	dolerite sill	Galerne et al. (2008)		6.86	15.609	1.97	9.92	2.85	1.05112	2.73	0.58	3.47	b.d.	2.1384	0.297	2.06	0.27		18.6921	16.3103	14.3796	13.9522	12.3377	12.0818	8.92157	10	9.10761	-	8.58795	8.25	8.30645	7.10526
Golden Valley Sill Complex	dolerite sill	Galerne et al. (2008)		11.42	26.037	3.08	15.13	3.97	1.22566	3.92	0.71	4.46	b.d.	2.4624	0.351	2.52	0.35		31.1172	27.2069	22.4818	21.2799	17.1861	14.088	12.8105	12.2414	11.706	-	9.88916	9.75	10.1613	9.21053
Golden Valley Sill Complex	dolerite sill	Galerne et al. (2008)		12.56	27.995	3.27	15.55	4.07	1.10672	3.65	0.73	4.08	b.d.	2.2572	0.36	2.4	0.38		34.2234	29.2529	23.8686	21.8706	17.619	12.7209	11.9281	12.5862	10.7087	-	9.06506	10	9.67742	10
Golden Valley Sill Complex	dolerite sill	Galerne et al. (2008)		9.94	22.814	2.67	13.28	3.43	1.11246	3.18	0.63	3.62	b.d.	2.1276	0.288	2.16	0.35		27.0845	23.8391	19.4891	18.6779	14.8485	12.7869	10.3922	10.8621	9.50131	-	8.54458	8	8.70968	9.21053
Golden Valley Sill Complex	dolerite sill	Galerne et al. (2008)		6.93	16.175	2.01	10.73	2.63	0.95188	2.68	0.494	3.73	b.d.	2.03	0.285	2.1	0.33		18.8828	16.9018	14.6715	15.0914	11.3853	10.9411	8.75817	8.51724	9.79003	-	8.15261	7.91667	8.46774	8.68421
Golden Valley Sill Complex	dolerite sill	Galerne et al. (2008)		7.87	17.29	2.13	10.9	3.06	0.891	3.18		3.67	b.d.	2.21	-	2.32	0.35		21.4441	18.0669	15.5474	15.3305	13.2468	10.2414	10.3922	0	9.63255	-	8.8755	-	9.35484	9.21053
Golden Valley Sill Complex	dolerite sill	Galerne et al. (2008)		6.85	15.884	2.01	10.16	2.94	0.9982	2.91	0.52	3.5	b.d.	2.16	0.297	2.03	0.31		18.6649	16.5977	14.6715	14.2897	12.7273	11.4736	9.5098	8.96552	9.18635	-	8.6747	8.25	8.18548	8.15789
Golden Valley Sill Complex	dolerite sill	Galerne et al. (2008)		11.267	24.326	2.93	15	3.58	1.15408	3.24	0.608	4.1	b.d.	2.12	0.3135	2.19	0.34		30.7003	25.419	21.3869	21.097	15.4978	13.2653	10.5882	10.4828	10.7612	-	8.51406	8.70833	8.83065	8.94737
Golden Valley Sill Complex	dolerite sill	Galerne et al. (2008)		6.66	15.059	1.76	9.24	2.66	0.915964	2.32	0.43	2.92	b.d.	1.6524	0.234	1.72	0.28		18.1471	15.7356	12.8467	12.9958	11.5152	10.5283	7.5817	7.41379	7.66404	-	6.63614	6.5	6.93548	7.36842
Golden Valley Sill Complex	dolerite sill	Galerne et al. (2008)		15.96	36.415	4.3	20.87	5.13	1.49615	4.76	0.8455	5.3	1.07	2.85	0.4655	2.82	0.42		43.4877	38.0512	31.3869	29.353	22.2078	17.1971	15.5556	14.5776	13.9108	12.5882	11.4458	12.9306	11.371	11.0526
Golden Valley Sill Complex	dolerite sill	Galerne et al. (2008)		11.84	27.005	3.26	15.69	3.71	1.11152	3.37	0.69	3.93	b.d.	2.5596	0.378	2.46	0.39		32.2616	28.2184	23.7956	22.0675	16.0606	12.7761	11.0131	11.8966	10.315	-	10.2795	10.5	9.91935	10.2632
Golden Valley Sill Complex	dolerite sill	Galerne et al. (2008)		11.69	25.586	3.09	15	3.74	1.10085	3.47	0.66	4.13	b.d.	2.592	0.36	2.44	0.4		31.8529	26.7356	22.5547	21.097	16.1905	12.6534	11.3399	11.3793	10.8399	-	10.4096	10	9.83871	10.5263
Golden Valley Sill Complex	dolerite sill	Galerne et al. (2008)		8.55	19.074	2.34	11.14	3	1.08982	2.58	0.57	3.27	b.d.	1.8792	0.279	2.1	0.29		23.297	19.931	17.0803	15.6681	12.987	12.5267	8.43137	9.82759	8.58268	-	7.54699	7.75	8.46774	7.63158
Golden Valley Sill Complex	dolerite sill	Galerne et al. (2008)		9.46	21.197	2.57	12.31	3.03	1.12191	2.88	0.62	3.53	b.d.	2.0952	0.288	2.09	0.34		25.7766	22.1494	18.7591	17.3136	13.1169	12.8955	9.41176	10.6897	9.26509	-	8.41446	8	8.42742	8.94737
Golden Valley Sill Complex	dolerite sill	Galerne et al. (2008)		13.22	28.352	3.29	15.18	3.82	1.19441	3.44	0.6365	4.06	b.d.	2.43	0.3515	2.38	0.38		36.0218	29.6259	24.0146	21.3502	16.5368	13.7289	11.2418	10.9741	10.6562	-	9.75904	9.76389	9.59677	10
Golden Valley Sill Complex	dolerite sill	Galerne et al. (2008)		11.03	25.047	2.9	14.28	3.78	1.041	3.32	0.7	3.89	b.d.	2.4192	0.306	2.42	0.34		30.0545	26.1724	21.1679	20.0844	16.3636	11.9655	10.8497	12.069	10.21	-	9.71566	8.5	9.75806	8.94737
Golden Valley Sill Complex	dolerite sill	Galerne et al. (2008)		13.03	28.935	3.51	16.45	3.79	1.27694	3.85	0.7125	4.21	b.d.	2.26	0.3515	2.47	0.35		35.5041	30.2351	25.6204	23.1364	16.4069	14.6775	12.5817	12.2845	11.0499	-	9.07631	9.76389	9.95968	9.21053
Golden Valley Sill Complex	dolerite sill	Galerne et al. (2008)		9.53	21.758	2.62	13.94	3.72	1.24136	3.88	0.74	4.65	b.d.	2.8296	0.378	2.66	0.4		25.9673	22.7356	19.1241	19.6062	16.1039	14.2685	12.6797	12.7586	12.2047	-	11.3639	10.5	10.7258	10.5263
Golden Valley Sill Complex	dolerite sill	Galerne et al. (2008)		10.12	22.836	2.69	13.16	3.64	1.24598	3.45	0.73	3.99	b.d.	2.4624	0.378	2.43	0.36		27.5749	23.8621	19.635	18.5091	15.7576	14.3216	11.2745	12.5862	10.4724	-	9.88916	10.5	9.79839	9.47368
Golden Valley Sill Complex	dolerite sill	Galerne et al. (2008)		7.78	16.97	2.13	10.83	2.85	0.97	3	0.57	3.79	b.d.	1.97	0.3	2.06	0.33		21.1989	17.7325	15.5474	15.2321	12.3377	11.1494	9.80392	9.82759	9.94751	-	7.91165	8.33333	8.30645	8.68421
Golden Valley Sill Complex	dolerite sill	Galerne et al. (2008)		10.85	24.893	2.89	14.37	3.8	1.04959	3.38	0.66	4.01	b.d.	2.4084	0.36	2.46	0.37		29.564	26.0115	21.0949	20.211	16.4502	12.0643	11.0458	11.3793	10.5249	-	9.67229	10	9.91935	9.73684
Golden Valley Sill Complex	dolerite sill	Galerne et al. (2008)		10.69	23.98	2.75	13.81	3.59	1.14794	3.1	0.66	3.76	b.d.	2.4084	0.315	2.39	0.35		29.1281	25.0575	20.073	19.4233	15.5411	13.1947	10.1307	11.3793	9.86877	-	9.67229	8.75	9.6371	9.21053
Golden Valley Sill Complex	dolerite sill	Galerne et al. (2008)		10.19	22.748	2.63	12.77	3.42	0.978986	3.09	0.64	3.62	b.d.	2.322	0.306	2.26	0.33		27.7657	23.7701	19.1971	17.9606	14.8052	11.2527	10.098	11.0345	9.50131	-	9.3253	8.5	9.1129	8.68421
Golden Valley Sill Complex	dolerite sill	Galerne et al. (2008)		7.28	16.659	2.09	10.86	3.25	1.00056	2.98	0.5605	3.81	b.d.	2.04	0.304	2.08	0.31		19.8365	17.4075	15.2555	15.2743	14.0693	11.5007	9.73856	9.66379	10	-	8.19277	8.44444	8.3871	8.15789
Golden Valley Sill Complex	dolerite sill	Galerne et al. (2008)		11.4	26.174	3.17	15.96	3.47	1.1964	3.42	0.6365	4.26	b.d.	2.23	0.3325	2.36	0.35		31.0627	27.3501	23.1387	22.4473	15.0216	13.7517	11.1765	10.9741	11.1811	-	8.95582	9.23611	9.51613	9.21053
Golden Valley Sill Complex	dolerite sill	Galerne et al. (2008)		7.87	16.219	2.08	11.54	2.76	0.975677	3.15	0.513	3.75	b.d.	1.94	0.304	2.08	0.28		21.4441	16.9478	15.1825	16.2307	11.9481	11.2147	10.2941	8.84483	9.84252	-	7.79116	8.44444	8.3871	7.36842
Golden Valley Sill Complex	dolerite sill	Galerne et al. (2008)		6.87	15.68	2	11.57	2.66	0.949979	2.64	0.532	3.72	b.d.	1.98	0.304	1.92	0.28		18.7193	16.3845	14.5985	16.2729	11.5152	10.9193	8.62745	9.17241	9.76378	-	7.95181	8.44444	7.74194	7.36842
Golden Valley Sill Complex	dolerite sill	Galerne et al. (2008)		10.8785	23.347	2.71	13.44	3.32	1.03272	3.22	0.5795	3.96	b.d.	2.04	0.3515	2.25	0.34		29.6417	24.396	19.781	18.903	14.3723	11.8703	10.5229	9.99138	10.3937	-	8.19277	9.76389	9.07258	8.94737
Golden Valley Sill Complex	dolerite sill	Galerne et al. (2008)		10.54	23.639	2.76	13.4	3.45	1.18275	3.19	0.66	3.74	b.d.	2.3328	0.324	2.3	0.35		28.7193	24.7011	20.146	18.8467	14.9351	13.5948	10.4248	11.3793	9.81627	-	9.36867	9	9.27419	9.21053
Golden Valley Sill Complex	dolerite sill	Galerne et al. (2008)		11.24	25.531	3.05	15.14	3.79	1.21127	3.5	0.72	4.36	b.d.	2.5272	0.378	2.71	0.42		30.6267	26.6782	22.2628	21.294	16.4069	13.9226	11.4379	12.4138	11.4436	-	10.1494	10.5	10.9274	11.0526
Golden Valley Sill Complex	dolerite sill	Galerne et al. (2008)		12.23	28.71	3.31	17.17	4.39	1.31568	4.22	0.85	5.05	1.01	3.1644	0.45	3.07	0.45		33.3243	30	24.1606	24.1491	19.0043	15.1228	13.7908	14.6552	13.2546	11.8824	12.7084	12.5	12.379	11.8421
Golden Valley Sill Complex	dolerite sill	Galerne et al. (2008)		6.83	14.69	1.88	9.29	2.64	0.836	2.59		3.17	b.d.	1.9	-	1.9	0.3		18.6104	15.3501	13.7226	13.0661	11.4286	9.6092	8.46405	0	8.32021	-	7.63052	-	7.66129	7.89474
Golden Valley Sill Complex	dolerite sill	Galerne et al. (2008)		12.28	26.18	3.27	14.65	3.81	1.122	3.77		4.13	0.9	2.51	-	2.59	0.4		33.4605	27.3563	23.8686	20.6048	16.4935	12.8966	12.3203	0	10.8399	10.5882	10.0803	-	10.4435	10.5263
Golden Valley Sill Complex	dolerite sill	Galerne et al. (2008)		6.68	15.724	2.01	10.38	2.51	0.962316	2.85	0.532	3.76	b.d.	1.9	0.2945	2	0.3		18.2016	16.4305	14.6715	14.5992	10.8658	11.0611	9.31373	9.17241	9.86877	-	7.63052	8.18056	8.06452	7.89474
Golden Valley Sill Complex	dolerite sill	Galerne et al. (2008)		7.75	17.787	2.13	10.38	2.91	0.910634	2.89	0.54	3.57	b.d.	2.1276	0.306	2.12	0.34		21.1172	18.5862	15.5474	14.5992	12.5974	10.4671	9.44444	9.31034	9.37008	-	8.54458	8.5	8.54839	8.94737
Golden Valley Sill Complex	dolerite sill	Galerne et al. (2008)		9.734	22.203	2.68	14.16	3.57	1.14631	3.65	0.627	4.59	b.d.	2.49	0.361	2.45	0.36		26.5232	23.2006	19.562	19.9156	15.4545	13.176	11.9281	10.8103	12.0472	-	10	10.0278	9.87903	9.47368
Golden Valley Sill Complex	dolerite sill	Galerne et al. (2008)		9.29	21.285	2.47	12.51	3.1	0.983115	2.8	0.59	3.47	b.d.	2.0736	0.279	2.06	0.3		25.3134	22.2414	18.0292	17.5949	13.4199	11.3002	9.15033	10.1724	9.10761	-	8.32771	7.75	8.30645	7.89474
Golden Valley Sill Complex	dolerite sill	Galerne et al. (2008)		6.68	14.663	1.8	9.33	2.57	0.909051	2.6	0.51	3.21	b.d.	1.8144	0.279	1.83	0.28		18.2016	15.3218	13.1387	13.1224	11.1255	10.4489	8.49673	8.7931	8.4252	-	7.28675	7.75	7.37903	7.36842
Golden Valley Sill Complex	dolerite sill	Galerne et al. (2008)		14.71	30.8	4.01	18.28	4.36	1.243	4.42		5.22	1.13	3.07	-	3.27	0.49		40.0817	32.1839	29.2701	25.7103	18.8745	14.2874	14.4444	0	13.7008	13.2941	12.3293	-	13.1855	12.8947
Golden Valley Sill Complex	dolerite sill	Galerne et al. (2008)		10.66	23.958	2.88	13.7	3.5	1.0701	3.31	0.67	4.15	b.d.	2.4624	0.333	2.43	0.35		29.0463	25.0345	21.0219	19.2686	15.1515	12.3	10.817	11.5517	10.8924	-	9.88916	9.25	9.79839	9.21053
Golden Valley Sill Complex	dolerite sill	Galerne et al. (2008)		6.64	15.603	1.93	10.38	2.55	0.8588	2.73	0.5035	3.4	b.d.	1.97	0.342	1.74	0.29		18.0926	16.3041	14.0876	14.5992	11.039	9.87126	8.92157	8.68103	8.92388	-	7.91165	9.5	7.01613	7.63158
Golden Valley Sill Complex	dolerite sill	Galerne et al. (2008)		10.15	24.079	2.7	13.48	3.17	1.09723	3.07	0.59	3.45	b.d.	2.1168	0.333	2.04	0.3		27.6567	25.1609	19.708	18.9592	13.7229	12.6118	10.0327	10.1724	9.05512	-	8.5012	9.25	8.22581	7.89474
Golden Valley Sill Complex	dolerite sill	Galerne et al. (2008)		12.81	26.91	3.32	15.69	3.85	1.034	3.72		4.18	0.97	2.54	-	2.61	0.4		34.9046	28.1191	24.2336	22.0675	16.6667	11.8851	12.1569	0	10.9711	11.4118	10.2008	-	10.5242	10.5263
Golden Valley Sill Complex	dolerite sill	Galerne et al. (2008)		5.68	14.118	1.82	9.04	2.56	0.812459	2.65	0.5035	3.08	b.d.	1.8	0.285	1.87	0.31		15.4768	14.7524	13.2847	12.7145	11.0823	9.33861	8.66013	8.68103	8.08399	-	7.22892	7.91667	7.54032	8.15789
Golden Valley Sill Complex	dolerite sill	Galerne et al. (2008)		9.97	22.693	2.7	13.44	3.39	0.99267	3.22	0.67	3.73	b.d.	2.484	0.333	2.26	0.34		27.1662	23.7126	19.708	18.903	14.6753	11.41	10.5229	11.5517	9.79003	-	9.9759	9.25	9.1129	8.94737
Golden Valley Sill Complex	dolerite sill	Galerne et al. (2008)		6.13	14.525	1.83	9.47	2.7	0.927567	2.59	0.475	3.1	b.d.	1.73	0.2565	1.82	0.28		16.703	15.1776	13.3577	13.3193	11.6883	10.6617	8.46405	8.18966	8.13648	-	6.94779	7.125	7.33871	7.36842
Golden Valley Sill Complex	dolerite sill	Galerne et al. (2008)		11.4	26.378	3.18	15.84	3.77	1.06351	3.5	0.69	4.12	b.d.	2.6028	0.387	2.66	0.4		31.0627	27.5632	23.2117	22.2785	16.3203	12.2243	11.4379	11.8966	10.8136	-	10.453	10.75	10.7258	10.5263
Golden Valley Sill Complex	dolerite sill	Galerne et al. (2008)		10.78	24.761	2.92	14.53	3.82	1.15344	3.34		3.91	b.d.	2.3544	-	2.4	0.37		29.3733	25.8736	21.3139	20.436	16.5368	13.2579	10.915	0	10.2625	-	9.45542	-	9.67742	9.73684
Golden Valley Sill Complex	dolerite sill	Galerne et al. (2008)		9.818	21.609	2.73	13.47	3.41	1.23621	3.51	0.7315	4.56	b.d.	2.48	0.38	2.76	0.39		26.752	22.5799	19.927	18.9451	14.7619	14.2093	11.4706	12.6121	11.9685	-	9.95984	10.5556	11.129	10.2632
Golden Valley Sill Complex	dolerite sill	Galerne et al. (2008)		7.51	16.72	2.1	10.49	2.53	0.96564	2.65	0.55	3.14	b.d.	1.836	0.252	1.78	0.24		20.4632	17.4713	15.3285	14.7539	10.9524	11.0993	8.66013	9.48276	8.24147	-	7.37349	7	7.17742	6.31579
Golden Valley Sill Complex	dolerite sill	Galerne et al. (2008)		5.22	12.023	1.53	7.72	2.23	0.873756	2.33	0.45	2.71	b.d.	1.6956	0.207	1.69	0.26		14.2234	12.5632	11.1679	10.8579	9.65368	10.0432	7.61438	7.75862	7.11286	-	6.80964	5.75	6.81452	6.84211
Golden Valley Sill Complex	dolerite sill	Galerne et al. (2008)		11.49	25.212	2.89	14.87	3.52	1.09697	3.45	0.68	3.99	0.81	2.4084	0.342	2.33	0.34		31.3079	26.3448	21.0949	20.9142	15.2381	12.6089	11.2745	11.7241	10.4724	9.52941	9.67229	9.5	9.39516	8.94737
Golden Valley Sill Complex	dolerite sill	Galerne et al. (2008)		7.87	17.781	2.22	11.98	2.9	1.12335	3.34	0.589	3.9	b.d.	2.01	0.323	2.15	0.3		21.4441	18.5799	16.2044	16.8495	12.5541	12.9121	10.915	10.1552	10.2362	-	8.07229	8.97222	8.66935	7.89474
Golden Valley Sill Complex	dolerite sill	Galerne et al. (2008)		13.89	31.157	3.6	18.86	4.46	1.33618	4.18	0.703	4.66	b.d.	2.62	0.418	2.57	0.37		37.8474	32.5569	26.2774	26.526	19.3074	15.3584	13.6601	12.1207	12.231	-	10.5221	11.6111	10.3629	9.73684
Golden Valley Sill Complex	dolerite sill	Galerne et al. (2008)		11.88	27.593	3.26	15.64	3.58	1.25373	3.57	0.703	4.51	b.d.	2.44	0.4085	2.38	0.37		32.3706	28.8328	23.7956	21.9972	15.4978	14.4107	11.6667	12.1207	11.8373	-	9.7992	11.3472	9.59677	9.73684
Golden Valley Sill Complex	dolerite sill	Galerne et al. (2008)		11.32	25.85	3.1	14.35	3.6	1.1266	3.48	0.72	3.89	b.d.	2.3652	0.36	2.45	0.38		30.8447	27.0115	22.6277	20.1828	15.5844	12.9494	11.3725	12.4138	10.21	-	9.4988	10	9.87903	10
Golden Valley Sill Complex	dolerite sill	Galerne et al. (2008)		7.15	15.983	1.94	9.53	2.82	0.991796	2.48	0.53	3.1	b.d.	1.836	0.27	1.84	0.28		19.4823	16.7011	14.1606	13.4037	12.2078	11.4	8.10458	9.13793	8.13648	-	7.37349	7.5	7.41935	7.36842
Golden Valley Sill Complex	dolerite sill	Galerne et al. (2008)		9.35	19.49	2.4	11.11	2.78	0.902	2.84		3.17	b.d.	1.91	-	1.94	0.29		25.4768	20.3657	17.5182	15.6259	12.0346	10.3678	9.28105	0	8.32021	-	7.67068	-	7.82258	7.63158
Golden Valley Sill Complex	dolerite sill	Galerne et al. (2008)		13.787	29.419	3.35	15.92	3.47	1.16517	3.54	0.646	4.25	b.d.	2.36	0.3515	2.41	0.36		37.5668	30.7409	24.4526	22.391	15.0216	13.3928	11.5686	11.1379	11.1549	-	9.47791	9.76389	9.71774	9.47368
Golden Valley Sill Complex	dolerite sill	Galerne et al. (2008)		11.4455	25.415	3.02	15.42	3.65	1.05817	3.3	0.627	4.31	b.d.	2.34	0.3515	2.31	0.37		31.1866	26.5569	22.0438	21.6878	15.8009	12.1629	10.7843	10.8103	11.3123	-	9.39759	9.76389	9.31452	9.73684
Golden Valley Sill Complex	dolerite sill	Galerne et al. (2008)		20.78	47.448	5.48	27.91	6.99	1.71741	6.4	1.1875	7.39	1.41	3.79	0.646	3.86	0.56		56.6213	49.5799	40	39.2546	30.2597	19.7403	20.915	20.4741	19.3963	16.5882	15.2209	17.9444	15.5645	14.7368
Golden Valley Sill Complex	dolerite sill	Galerne et al. (2008)		11.21	25.41	3.12	14.99	3.68	1.18768	3.26	0.67	3.83	b.d.	2.3328	0.342	2.38	0.38		30.545	26.5517	22.7737	21.083	15.9307	13.6515	10.6536	11.5517	10.0525	-	9.36867	9.5	9.59677	10
Golden Valley Sill Complex	dolerite sill	Galerne et al. (2008)		10.23	23.056	2.71	13.4	3.31	1.01715	3.24	0.65	3.7	b.d.	2.3976	0.315	2.2	0.34		27.8747	24.092	19.781	18.8467	14.329	11.6914	10.5882	11.2069	9.71129	-	9.62892	8.75	8.87097	8.94737
Golden Valley Sill Complex	dolerite sill	Galerne et al. (2008)		6.73	14.861	1.76	9.31	2.41	0.825542	2.45	0.47	2.79	b.d.	1.6848	0.234	1.64	0.25		18.3379	15.5287	12.8467	13.0942	10.4329	9.48899	8.00654	8.10345	7.32283	-	6.76627	6.5	6.6129	6.57895
Golden Valley Sill Complex	dolerite sill	Galerne et al. (2008)		11.86	26.312	3.22	16.05	4.43	1.29044	3.96	0.82	4.56	b.d.	2.862	0.414	2.72	0.43		32.3161	27.4943	23.5036	22.5738	19.1775	14.8326	12.9412	14.1379	11.9685	-	11.494	11.5	10.9677	11.3158
Golden Valley Sill Complex	dolerite sill	Galerne et al. (2008)		10.2	21.31	2.66	12.55	3.12	1.001	3.26		3.72	b.d.	2.29	-	2.3	0.32		27.7929	22.2675	19.4161	17.6512	13.5065	11.5057	10.6536	0	9.76378	-	9.19679	-	9.27419	8.42105
Golden Valley Sill Complex	dolerite sill	Galerne et al. (2008)		9.63	21.967	2.69	12.63	3.17	1.04593	3.11	0.64	3.67	b.d.	2.2356	0.324	2.22	0.33		26.2398	22.954	19.635	17.7637	13.7229	12.0222	10.1634	11.0345	9.63255	-	8.97831	9	8.95161	8.68421
Golden Valley Sill Complex	dolerite sill	Galerne et al. (2008)		10.763	24.051	2.88	14.74	3.44	1.1318	3.24	0.627	4.11	b.d.	2.18	0.323	2.26	0.35		29.327	25.1317	21.0219	20.7314	14.8918	13.0092	10.5882	10.8103	10.7874	-	8.75502	8.97222	9.1129	9.21053
Golden Valley Sill Complex	dolerite sill	Galerne et al. (2008)		6.26	13.29	1.71	7.99	2.45	0.748	2.4		2.77	b.d.	1.74	-	1.64	0.28		17.0572	13.8871	12.4818	11.2377	10.6061	8.5977	7.84314	0	7.27034	-	6.98795	-	6.6129	7.36842
Golden Valley Sill Complex	dolerite sill	Galerne et al. (2008)		7.28	15.62	1.93	9.98	2.85	1.00033	2.77	0.57	3.32	b.d.	1.9656	0.27	2.13	0.29		19.8365	16.3218	14.0876	14.0366	12.3377	11.498	9.05229	9.82759	8.71391	-	7.89398	7.5	8.58871	7.63158
Golden Valley Sill Complex	dolerite sill	Galerne et al. (2008)		6.9095	15.68	1.9	10.33	2.75	1.01411	2.83	0.5225	3.45	b.d.	1.91	0.285	2	0.27		18.827	16.3845	13.8686	14.5288	11.9048	11.6564	9.24837	9.00862	9.05512	-	7.67068	7.91667	8.06452	7.10526
Golden Valley Sill Complex	dolerite sill	Galerne et al. (2008)		11.46	26.35	3.14	15.72	3.91	1.13014	3.59	0.665	4.1	b.d.	2.36	0.38	2.5	0.37		31.2262	27.534	22.9197	22.1097	16.9264	12.9901	11.732	11.4655	10.7612	-	9.47791	10.5556	10.0806	9.73684
Golden Valley Sill Complex	dolerite sill	Galerne et al. (2008)		11.45	25.641	3.08	15.3	3.92	1.15543	3.75	0.7	4.22	b.d.	2.592	0.351	2.68	0.38		31.1989	26.7931	22.4818	21.519	16.9697	13.2808	12.2549	12.069	11.0761	-	10.4096	9.75	10.8065	10
Golden Valley Sill Complex	dolerite sill	Galerne et al. (2008)		10.87	23.88	2.9	13.49	3.6	0.99	3.18		3.84	0.82	2.27	-	2.43	0.33		29.6185	24.953	21.1679	18.9733	15.5844	11.3793	10.3922	0	10.0787	9.64706	9.11647	-	9.79839	8.68421
Golden Valley Sill Complex	dolerite sill	Galerne et al. (2008)		10.33	23.65	2.78	13.01	3.68	1.20073	3.17	0.67	3.92	b.d.	2.3436	0.333	2.33	0.33		28.1471	24.7126	20.292	18.2982	15.9307	13.8015	10.3595	11.5517	10.2887	-	9.41205	9.25	9.39516	8.68421
Golden Valley Sill Complex	dolerite sill	Galerne et al. (2008)		7.05	16.648	2.1	11.54	3.24	1.10571	2.85	0.532	3.59	b.d.	2.04	0.3135	2.23	0.31		19.2098	17.396	15.3285	16.2307	14.026	12.7093	9.31373	9.17241	9.42257	-	8.19277	8.70833	8.99194	8.15789
Golden Valley Sill Complex	dolerite sill	Galerne et al. (2008)		10.34	23.166	2.78	13.23	3.29	1.07714	3.06	0.6	3.71	b.d.	2.2788	0.342	2.3	0.32		28.1744	24.2069	20.292	18.6076	14.2424	12.3809	10	10.3448	9.73753	-	9.15181	9.5	9.27419	8.42105
Golden Valley Sill Complex	dolerite sill	Galerne et al. (2008)		10.43	23.804	2.76	13.52	3.53	1.00118	3.25	0.59	3.78	b.d.	2.3112	0.306	2.25	0.32		28.4196	24.8736	20.146	19.0155	15.2814	11.5078	10.6209	10.1724	9.92126	-	9.28193	8.5	9.07258	8.42105
Golden Valley Sill Complex	dolerite sill	Galerne et al. (2008)		7.98	17.46	2.21	10.74	3.12	0.902	3.15		3.54	b.d.	2.12	-	2.21	0.34		21.7439	18.2445	16.1314	15.1055	13.5065	10.3678	10.2941	0	9.29134	-	8.51406	-	8.91129	8.94737
Golden Valley Sill Complex	dolerite sill	Galerne et al. (2008)		10.49	23.248	2.8	13.75	3.16	1.13284	3.13	0.627	3.9	b.d.	2.11	0.342	2.17	0.34		28.5831	24.2926	20.438	19.339	13.6797	13.0211	10.2288	10.8103	10.2362	-	8.4739	9.5	8.75	8.94737
Golden Valley Sill Complex	dolerite sill	Galerne et al. (2008)		7.36	16.714	2.14	10.44	2.83	0.939361	2.9	0.5415	3.81	b.d.	1.99	0.304	2.05	0.34		20.0545	17.465	15.6204	14.6835	12.2511	10.7973	9.47712	9.33621	10	-	7.99197	8.44444	8.26613	8.94737
Golden Valley Sill Complex	dolerite sill	Galerne et al. (2008)		7.17	16.071	2.01	10.28	2.83	1.01418	2.83	0.6	3.44	b.d.	2.2464	0.297	2.18	0.3		19.5368	16.7931	14.6715	14.4585	12.2511	11.6572	9.24837	10.3448	9.02887	-	9.02169	8.25	8.79032	7.89474
Golden Valley Sill Complex	dolerite sill	Galerne et al. (2008)		11.53	24.805	2.99	14.82	3.67	1.09561	3.24	0.66	3.95	b.d.	2.4624	0.36	2.31	0.35		31.4169	25.9195	21.8248	20.8439	15.8874	12.5932	10.5882	11.3793	10.3675	-	9.88916	10	9.31452	9.21053
Golden Valley Sill Complex	dolerite sill	Galerne et al. (2008)		11.93	26.389	3.15	14.64	3.93	1.26527	3.77	0.68	4.07	b.d.	2.4732	0.369	2.35	0.34		32.5068	27.5747	22.9927	20.5907	17.013	14.5433	12.3203	11.7241	10.6824	-	9.93253	10.25	9.47581	8.94737
Golden Valley Sill Complex	dolerite sill	Galerne et al. (2008)		9.89	22.429	2.71	13.11	3.12	1.0332	3.08	0.6	3.68	b.d.	2.268	0.306	2.15	0.32		26.9482	23.4368	19.781	18.4388	13.5065	11.8759	10.0654	10.3448	9.65879	-	9.10843	8.5	8.66935	8.42105
Golden Valley Sill Complex	dolerite sill	Galerne et al. (2008)		10.1015	22.115	2.74	13.82	3.89	1.20154	3.65	0.6745	4.71	b.d.	2.41	0.4085	2.6	0.4		27.5245	23.1087	20	19.4374	16.8398	13.8108	11.9281	11.6293	12.3622	-	9.67871	11.3472	10.4839	10.5263
Golden Valley Sill Complex	dolerite sill	Galerne et al. (2008)		11.93	25.05	3.08	14.84	3.82	1.034	3.62		3.9	0.89	2.51	-	2.62	0.39		32.5068	26.1755	22.4818	20.872	16.5368	11.8851	11.8301	0	10.2362	10.4706	10.0803	-	10.5645	10.2632
Golden Valley Sill Complex	dolerite sill	Galerne et al. (2008)		10.23	23.76	2.75	13.41	3.56	1.01854	3.39	0.67	4.03	b.d.	2.6244	0.315	2.44	0.36		27.8747	24.8276	20.073	18.8608	15.4113	11.7074	11.0784	11.5517	10.5774	-	10.5398	8.75	9.83871	9.47368
Golden Valley Sill Complex	dolerite sill	Galerne et al. (2008)		10.42	23.562	2.76	13.1	3.64	1.14871	3.41	0.67	3.79	0.82	2.5164	0.351	2.35	0.36		28.3924	24.6207	20.146	18.4248	15.7576	13.2036	11.1438	11.5517	9.94751	9.64706	10.106	9.75	9.47581	9.47368
Golden Valley Sill Complex	dolerite sill	Galerne et al. (2008)		8.66	20.724	2.54	13.3	3.63	1.32201	3.78	0.7	4.52	b.d.	2.6892	0.387	2.58	0.39		23.5967	21.6552	18.5401	18.706	15.7143	15.1955	12.3529	12.069	11.8635	-	10.8	10.75	10.4032	10.2632
Golden Valley Sill Complex	dolerite sill	Galerne et al. (2008)		9.57	21.934	2.63	12.79	3.04	0.966724	3.41	0.6	3.57	b.d.	2.1924	0.288	2.21	0.33		26.0763	22.9195	19.1971	17.9887	13.1602	11.1118	11.1438	10.3448	9.37008	-	8.80482	8	8.91129	8.68421
Golden Valley Sill Complex	dolerite sill	Galerne et al. (2008)		10.59	24.491	2.91	15.95	3.6	1.15231	3.56	0.646	4	b.d.	2.26	0.361	2.28	0.35		28.8556	25.5914	21.2409	22.4332	15.5844	13.2449	11.634	11.1379	10.4987	-	9.07631	10.0278	9.19355	9.21053
Golden Valley Sill Complex	dolerite sill	Galerne et al. (2008)		11.96	25.756	3.04	14.54	3.64	1.14109	3.65	0.6555	3.97	b.d.	2.13	0.3515	2.28	0.35		32.5886	26.9133	22.1898	20.4501	15.7576	13.116	11.9281	11.3017	10.4199	-	8.55422	9.76389	9.19355	9.21053
Golden Valley Sill Complex	dolerite sill	Galerne et al. (2008)		10.45	21.53	2.69	12.39	3.37	0.957	2.99		3.53	0.75	2.09	-	2.11	0.37		28.4741	22.4974	19.635	17.4262	14.5887	11	9.77124	0	9.26509	8.82353	8.39357	-	8.50806	9.73684
Golden Valley Sill Complex	dolerite sill	Galerne et al. (2008)		12.49	28.017	3.29	16.15	4.02	1.19313	3.71	0.7	4.15	b.d.	2.5272	0.369	2.64	0.4		34.0327	29.2759	24.0146	22.7145	17.4026	13.7141	12.1242	12.069	10.8924	-	10.1494	10.25	10.6452	10.5263
Golden Valley Sill Complex	dolerite sill	Galerne et al. (2008)		12.74	26.79	3.29	15.56	3.71	1.067	3.82		4.2	b.d.	2.6	-	2.66	0.4		34.7139	27.9937	24.0146	21.8847	16.0606	12.2644	12.4837	0	11.0236	-	10.4418	-	10.7258	10.5263
Golden Valley Sill Complex	dolerite sill	Galerne et al. (2008)		10.83	24.31	3.01	14.44	3.63	1.17041	3.49	0.67	3.76	b.d.	2.4516	0.36	2.35	0.33		29.5095	25.4023	21.9708	20.3094	15.7143	13.453	11.4052	11.5517	9.86877	-	9.84578	10	9.47581	8.68421
Golden Valley Sill Complex	dolerite sill	Galerne et al. (2008)		9.56	22.159	2.74	13.44	3.12	1.04353	2.97	0.5605	3.58	b.d.	2.06	0.3135	1.98	0.29		26.049	23.1546	20	18.903	13.5065	11.9946	9.70588	9.66379	9.39633	-	8.27309	8.70833	7.98387	7.63158
Golden Valley Sill Complex	dolerite sill	Galerne et al. (2008)		8.02	17.35	2.2	10.41	3.11	0.88	3.07		3.62	b.d.	2.29	-	2.26	0.33		21.8529	18.1296	16.0584	14.6414	13.4632	10.1149	10.0327	0	9.50131	-	9.19679	-	9.1129	8.68421
Golden Valley Sill Complex	dolerite sill	Galerne et al. (2008)		9.19	21.252	2.61	12.86	3.43	0.996926	3.17	0.57	3.39	b.d.	2.1816	0.306	2.06	0.31		25.0409	22.2069	19.0511	18.0872	14.8485	11.4589	10.3595	9.82759	8.89764	-	8.76145	8.5	8.30645	8.15789
Golden Valley Sill Complex	dolerite sill	Galerne et al. (2008)		9.39	22	2.68	13.75	3.83	1.31883	3.86	0.77	4.58	b.d.	2.9592	0.378	2.7	0.43		25.5858	22.9885	19.562	19.339	16.5801	15.159	12.6144	13.2759	12.021	-	11.8843	10.5	10.8871	11.3158
Golden Valley Sill Complex	dolerite sill	Galerne et al. (2008)		11.83	25.36	3.07	14.74	3.79	1.023	3.73		4.14	0.89	2.51	-	2.65	0.39		32.2343	26.4995	22.4088	20.7314	16.4069	11.7586	12.1895	0	10.8661	10.4706	10.0803	-	10.6855	10.2632
Golden Valley Sill Complex	dolerite sill	Galerne et al. (2008)		9.07	21.065	2.48	12.25	3.29	0.975203	3.03	0.65	3.64	b.d.	2.2464	0.306	2.05	0.36		24.7139	22.0115	18.1022	17.2293	14.2424	11.2092	9.90196	11.2069	9.55381	-	9.02169	8.5	8.26613	9.47368
Golden Valley Sill Complex	dolerite sill	Galerne et al. (2008)		7.82	17.248	2.14	11.74	3.13	1.10174	2.92	0.61	3.63	b.d.	2.2248	0.288	2.14	0.31		21.3079	18.023	15.6204	16.512	13.5498	12.6637	9.54248	10.5172	9.52756	-	8.93494	8	8.62903	8.15789
Golden Valley Sill Complex	dolerite sill	Galerne et al. (2008)		11.34	26.147	3.07	14.97	3.41	1.11845	3.55	0.67	3.98	b.d.	2.4624	0.333	2.37	0.36		30.8992	27.3218	22.4088	21.0549	14.7619	12.8557	11.6013	11.5517	10.4462	-	9.88916	9.25	9.55645	9.47368
Golden Valley Sill Complex	dolerite sill	Galerne et al. (2008)		10.91	24.849	2.92	14.33	3.78	1.07117	3.37	0.67	3.93	b.d.	2.4516	0.324	2.32	0.36		29.7275	25.9655	21.3139	20.1547	16.3636	12.3123	11.0131	11.5517	10.315	-	9.84578	9	9.35484	9.47368
Golden Valley Sill Complex	dolerite sill	Galerne et al. (2008)		13.98	31.509	3.74	18.29	4.23	1.40226	4.07	0.8075	4.84	b.d.	2.79	0.4465	2.7	0.42		38.0926	32.9248	27.2993	25.7243	18.3117	16.1179	13.3007	13.9224	12.7034	-	11.2048	12.4028	10.8871	11.0526
Golden Valley Sill Complex	dolerite sill	Galerne et al. (2008)		7.51	17.061	2.15	10.41	3.07	0.997183	3.18	0.62	3.82	b.d.	2.2032	0.306	2.08	0.31		20.4632	17.8276	15.6934	14.6414	13.29	11.4619	10.3922	10.6897	10.0262	-	8.84819	8.5	8.3871	8.15789
Golden Valley Sill Complex	dolerite sill	Galerne et al. (2008)		10.75	24.882	2.9	14.36	3.45	1.09625	3.36	0.64	4.13	0.84	2.4192	0.351	2.45	0.35		29.2916	26	21.1679	20.1969	14.9351	12.6006	10.9804	11.0345	10.8399	9.88235	9.71566	9.75	9.87903	9.21053
Golden Valley Sill Complex	dolerite sill	Galerne et al. (2008)		11.83	25.492	3.12	14.61	3.54	1.26774	3.53	0.6365	4.11	0.83	2.29	0.342	2.39	0.33		32.2343	26.6374	22.7737	20.5485	15.3247	14.5717	11.5359	10.9741	10.7874	9.76471	9.19679	9.5	9.6371	8.68421
Drakensberg (Lesotho)	basalt	Luttinen et al. (2018)		9.14	18.36	2.53	11.13	3.17	1.08	3.77	0.66	4.41	0.94	2.68	0.38	2.42	0.39		24.9046	19.185	18.4672	15.654	13.7229	12.4138	12.3203	11.3793	11.5748	11.0588	10.7631	10.5556	9.75806	10.2632
Drakensberg (Lesotho)	basalt	Luttinen et al. (2018)		12.05	24.29	3.18	14.3	4.24	1.34	4.62	0.88	5.72	1.22	3.61	0.47	2.96	0.48		32.8338	25.3814	23.2117	20.1125	18.355	15.4023	15.098	15.1724	15.0131	14.3529	14.498	13.0556	11.9355	12.6316
Drakensberg (Lesotho)	basalt	Luttinen et al. (2018)		8.02	16.62	2.16	9.83	2.93	1.03	3.38	0.58	4.02	0.87	2.34	0.35	2.13	0.33		21.8529	17.3668	15.7664	13.8256	12.684	11.8391	11.0458	10	10.5512	10.2353	9.39759	9.72222	8.58871	8.68421
Drakensberg (Lesotho)	basalt	Luttinen et al. (2018)		13.89	27.87	3.54	15.91	4.75	1.49	5.25	1	6.44	1.38	3.93	0.55	3.29	0.52		37.8474	29.1223	25.8394	22.3769	20.5628	17.1264	17.1569	17.2414	16.9029	16.2353	15.7831	15.2778	13.2661	13.6842
Drakensberg (Lesotho)	basalt	Luttinen et al. (2018)		14.04	28.23	3.56	16.1	4.67	1.5	5.07	0.99	6.21	1.3	3.87	0.52	3.27	0.5		38.2561	29.4984	25.9854	22.6442	20.2165	17.2414	16.5686	17.069	16.2992	15.2941	15.5422	14.4444	13.1855	13.1579
Drakensberg (Lesotho)	basalt	Luttinen et al. (2018)		12.66	24.61	3.27	13.96	3.62	1.2	4.2	0.69	4.61	0.96	2.7	0.38	2.36	0.39		34.4959	25.7158	23.8686	19.6343	15.671	13.7931	13.7255	11.8966	12.0997	11.2941	10.8434	10.5556	9.51613	10.2632
Drakensberg (Lesotho)	basalt	Luttinen et al. (2018)		12.47	25.36	3.15	14.45	4.18	1.34	4.45	0.85	5.42	1.17	3.32	0.45	2.74	0.44		33.9782	26.4995	22.9927	20.3235	18.0952	15.4023	14.5425	14.6552	14.2257	13.7647	13.3333	12.5	11.0484	11.5789
Drakensberg (Lesotho)	basalt	Luttinen et al. (2018)		8.47	16.83	2.28	10.17	2.91	0.99	3.44	0.58	3.86	0.83	2.36	0.34	2.1	0.35		23.079	17.5862	16.6423	14.3038	12.5974	11.3793	11.2418	10	10.1312	9.76471	9.47791	9.44444	8.46774	9.21053
Drakensberg (Lesotho)	basalt	Luttinen et al. (2018)		11.15	22.85	2.79	12.33	3.57	1.15	3.95	0.73	4.64	0.99	2.98	0.41	2.46	0.37		30.3815	23.8767	20.365	17.3418	15.4545	13.2184	12.9085	12.5862	12.1785	11.6471	11.9679	11.3889	9.91935	9.73684
Drakensberg (Lesotho)	basalt	Luttinen et al. (2018)		14.04	28.04	3.59	15.85	4.74	1.46	5.22	0.89	6.15	1.37	3.79	0.52	3.25	0.53		38.2561	29.2999	26.2044	22.2925	20.5195	16.7816	17.0588	15.3448	16.1417	16.1176	15.2209	14.4444	13.1048	13.9474
Drakensberg (Lesotho)	basalt	Luttinen et al. (2018)		14.41	29.06	3.79	16.62	4.88	1.46	5.38	0.95	6.18	1.37	3.91	0.54	3.28	0.52		39.2643	30.3657	27.6642	23.3755	21.1255	16.7816	17.5817	16.3793	16.2205	16.1176	15.7028	15	13.2258	13.6842
Drakensberg (Lesotho)	basalt	Luttinen et al. (2018)		12.87	26.72	3.46	15.36	4.31	1.3	4.93	0.88	5.53	1.22	3.57	0.51	3.2	0.49		35.0681	27.9206	25.2555	21.6034	18.658	14.9425	16.1111	15.1724	14.5144	14.3529	14.3373	14.1667	12.9032	12.8947
Drakensberg (Lesotho)	basalt	Luttinen et al. (2018)		12.9	25.82	3.31	14.66	4.12	1.32	4.46	0.84	5.54	1.15	3.37	0.45	2.82	0.44		35.1499	26.9801	24.1606	20.6188	17.8355	15.1724	14.5752	14.4828	14.5407	13.5294	13.5341	12.5	11.371	11.5789
Drakensberg (Lesotho)	basalt	Luttinen et al. (2018)		15.45	30.87	4.01	17.74	4.73	1.43	5.51	0.92	6.21	1.33	3.68	0.54	3.28	0.53		42.0981	32.2571	29.2701	24.9508	20.4762	16.4368	18.0065	15.8621	16.2992	15.6471	14.7791	15	13.2258	13.9474
Drakensberg (Lesotho)	basalt	Luttinen et al. (2018)		10.75	21.74	2.75	11.94	3.37	1.11	3.84	0.65	4.48	0.95	2.59	0.38	2.31	0.37		29.2916	22.7168	20.073	16.7932	14.5887	12.7586	12.549	11.2069	11.7585	11.1765	10.4016	10.5556	9.31452	9.73684
Drakensberg (Lesotho)	basalt	Luttinen et al. (2018)		8.89	18.18	2.35	10.95	3.23	1.12	3.53	0.69	4.4	0.95	2.79	0.39	2.36	0.36		24.2234	18.9969	17.1533	15.4008	13.9827	12.8736	11.5359	11.8966	11.5486	11.1765	11.2048	10.8333	9.51613	9.47368
Drakensberg (Lesotho)	basalt	Luttinen et al. (2018)		11.3	23.13	2.86	12.73	3.66	1.17	4.03	0.74	4.83	1.02	2.99	0.42	2.57	0.4		30.7902	24.1693	20.8759	17.9044	15.8442	13.4483	13.1699	12.7586	12.6772	12	12.008	11.6667	10.3629	10.5263
Drakensberg (Lesotho)	basalt	Luttinen et al. (2018)		15.36	30.46	3.82	16.8	4.85	1.52	5.49	1.01	6.38	1.37	4.03	0.54	3.29	0.51		41.8529	31.8286	27.8832	23.6287	20.9957	17.4713	17.9412	17.4138	16.7454	16.1176	16.1847	15	13.2661	13.4211
Drakensberg (Lesotho)	basalt	Luttinen et al. (2018)		13.23	27.57	3.53	15.57	4.22	1.31	4.97	0.86	5.51	1.21	3.48	0.5	3.16	0.48		36.049	28.8088	25.7664	21.8987	18.2684	15.0575	16.2418	14.8276	14.4619	14.2353	13.9759	13.8889	12.7419	12.6316
Drakensberg (Lesotho)	basalt	Luttinen et al. (2018)		9.36	18.46	2.35	10.35	2.95	1.01	3.34	0.56	3.96	0.84	2.25	0.33	2.03	0.32		25.5041	19.2894	17.1533	14.557	12.7706	11.6092	10.915	9.65517	10.3937	9.88235	9.03614	9.16667	8.18548	8.42105
Drakensberg (Lesotho)	basalt	Luttinen et al. (2018)		16.85	29.53	4.14	17.91	4.9	1.47	5.66	0.95	6.37	1.33	3.58	0.53	3.28	0.51		45.9128	30.8568	30.219	25.1899	21.2121	16.8966	18.4967	16.3793	16.7192	15.6471	14.3775	14.7222	13.2258	13.4211
Drakensberg (Lesotho)	basalt	Luttinen et al. (2018)		12.47	24.82	3.1	13.69	3.91	1.26	4.3	0.8	5.16	1.09	3.14	0.42	2.57	0.4		33.9782	25.9352	22.6277	19.2546	16.9264	14.4828	14.0523	13.7931	13.5433	12.8235	12.6104	11.6667	10.3629	10.5263
Drakensberg (Lesotho)	basalt	Luttinen et al. (2018)		11.71	23.08	2.93	13.12	3.69	1.22	4.12	0.78	4.92	1.04	3	0.41	2.59	0.41		31.9074	24.117	21.3869	18.4529	15.974	14.023	13.4641	13.4483	12.9134	12.2353	12.0482	11.3889	10.4435	10.7895
Drakensberg (Lesotho)	basalt	Luttinen et al. (2018)		9.62	18.35	2.44	10.56	3.05	1.07	3.6	0.62	3.99	0.88	2.5	0.35	2.13	0.34		26.2125	19.1745	17.8102	14.8523	13.2035	12.2989	11.7647	10.6897	10.4724	10.3529	10.0402	9.72222	8.58871	8.94737
Drakensberg (Lesotho)	basalt	Luttinen et al. (2018)		12.62	25.26	3.18	14.38	4.08	1.34	4.49	0.85	5.47	1.16	3.35	0.45	2.77	0.44		34.3869	26.395	23.2117	20.225	17.6623	15.4023	14.6732	14.6552	14.357	13.6471	13.4538	12.5	11.1694	11.5789
Drakensberg (Lesotho)	basalt	Luttinen et al. (2018)		8.92	17.07	2.28	10.15	3.07	1.06	3.61	0.6	4.2	0.9	2.44	0.33	2.1	0.35		24.3052	17.837	16.6423	14.2757	13.29	12.1839	11.7974	10.3448	11.0236	10.5882	9.7992	9.16667	8.46774	9.21053
Drakensberg (Lesotho)	basalt	Luttinen et al. (2018)		12.79	25.14	3.2	13.8	3.8	1.2	4.21	0.73	4.78	1.05	2.95	0.42	2.58	0.42		34.8501	26.2696	23.3577	19.4093	16.4502	13.7931	13.7582	12.5862	12.5459	12.3529	11.8474	11.6667	10.4032	11.0526
Drakensberg (Lesotho)	basalt	Luttinen et al. (2018)		16.09	32.32	4.16	17.93	4.82	1.44	5.4	0.9	6.2	1.32	3.66	0.53	3.33	0.53		43.842	33.7722	30.365	25.218	20.8658	16.5517	17.6471	15.5172	16.273	15.5294	14.6988	14.7222	13.4274	13.9474
Drakensberg (Lesotho)	basalt	Luttinen et al. (2018)		10.66	21.73	2.75	11.84	3.28	1.11	3.76	0.65	4.44	0.92	2.54	0.37	2.34	0.37		29.0463	22.7064	20.073	16.6526	14.1991	12.7586	12.2876	11.2069	11.6535	10.8235	10.2008	10.2778	9.43548	9.73684
Drakensberg (Lesotho)	basalt	Luttinen et al. (2018)		11.9	23.89	3.03	13.04	3.53	1.15	3.93	0.68	4.66	0.99	2.61	0.4	2.4	0.39		32.4251	24.9634	22.1168	18.3404	15.2814	13.2184	12.8431	11.7241	12.231	11.6471	10.4819	11.1111	9.67742	10.2632
Drakensberg (Lesotho)	basalt	Luttinen et al. (2018)		10.14	20.37	2.58	11.79	3.47	1.22	3.74	0.72	4.62	0.95	2.8	0.38	2.38	0.36		27.6294	21.2853	18.8321	16.5823	15.0216	14.023	12.2222	12.4138	12.126	11.1765	11.245	10.5556	9.59677	9.47368
Drakensberg (Lesotho)	basalt	Luttinen et al. (2018)		11.47	22.65	2.84	12.65	3.44	1.12	3.67	0.71	4.5	0.94	2.75	0.37	2.4	0.37		31.2534	23.6677	20.7299	17.7918	14.8918	12.8736	11.9935	12.2414	11.811	11.0588	11.0442	10.2778	9.67742	9.73684
Drakensberg (Lesotho)	basalt	Luttinen et al. (2018)		8.18	16.55	2.16	9.68	2.9	1.04	3.43	0.6	4.02	0.85	2.32	0.34	2.08	0.32		22.2888	17.2936	15.7664	13.6146	12.5541	11.954	11.2092	10.3448	10.5512	10	9.31727	9.44444	8.3871	8.42105
Drakensberg (Lesotho)	basalt	Luttinen et al. (2018)		8.85	17.41	2.22	9.99	3.08	1.09	3.56	0.62	4.32	0.9	2.42	0.35	2.15	0.33		24.1144	18.1923	16.2044	14.0506	13.3333	12.5287	11.634	10.6897	11.3386	10.5882	9.71888	9.72222	8.66935	8.68421
Drakensberg (Lesotho)	basalt	Luttinen et al. (2018)		11.37	22.19	2.87	11.92	3.19	1.07	3.62	0.64	3.99	0.84	2.4	0.34	2.12	0.33		30.9809	23.187	20.9489	16.7651	13.8095	12.2989	11.8301	11.0345	10.4724	9.88235	9.63855	9.44444	8.54839	8.68421
Drakensberg (Lesotho)	basalt	Luttinen et al. (2018)		12.41	23.45	2.9	12.75	3.55	1.21	3.95	0.71	4.58	0.98	2.8	0.37	2.3	0.36		33.8147	24.5037	21.1679	17.9325	15.368	13.908	12.9085	12.2414	12.021	11.5294	11.245	10.2778	9.27419	9.47368
Drakensberg (Lesotho)	basalt	Luttinen et al. (2018)		12.59	23.69	2.95	11.99	3.23	1.08	3.61	0.63	3.97	0.87	2.45	0.34	2.07	0.33		34.3052	24.7544	21.5328	16.8636	13.9827	12.4138	11.7974	10.8621	10.4199	10.2353	9.83936	9.44444	8.34677	8.68421
Drakensberg (Lesotho)	basalt	Luttinen et al. (2018)		15.65	30.44	3.66	15.61	4.36	1.28	4.57	0.87	5.28	1.12	3.23	0.44	2.69	0.42		42.6431	31.8077	26.7153	21.955	18.8745	14.7126	14.9346	15	13.8583	13.1765	12.9719	12.2222	10.8468	11.0526

## Sheet: modern river sediments
River	Rock type	Reference	concentration [ppm]	La	Ce	Pr	Nd	Sm	Eu	Gd	Tb	Dy	Ho	Er	Tm	Yb	Lu	chondrite normalization	LaN	CeN	PrN	NdN	SmN	EuN	GdN	TbN	DyN	HoN	ErN	TmN	YbN	LuN
Pienaars River (draining Transvaal and Karoo)	river mud	Garzanti et al. (2014)		56.1	106	11.71	40.3	7.26	1.52	7	1.05	7.03	1.14	3.3	0.55	3.91	0.51	McLennan et al. (1980)	152.861	110.763	85.4745	56.6807	31.4286	17.4713	22.8758	18.1034	18.4514	13.4118	13.253	10.5556	15.7661	13.4211
Olifants River (draining Bushveld Cpx)	river mud	Garzanti et al. (2014)		30.3	64.9	7.24	27.5	5.37	1.08	5.17	0.82	4.76	1.02	3.05	0.44	2.93	0.43		82.5613	67.8161	52.8467	38.6779	23.2468	12.4138	16.8954	14.1379	12.4934	12	12.249	11.5556	11.8145	11.3158
Serobaneng River (draining Transvaal)	river mud	Garzanti et al. (2014)		56.1	108.2	13.74	50.6	8.89	1.5	7.24	1.08	6.19	1.15	3.19	0.47	3.37	0.42		152.861	113.062	100.292	71.1674	38.4848	17.2414	23.6601	18.6207	16.2467	13.5294	12.8112	12.5556	13.5887	11.0526
Diep River (draining Kaapvaal)	river mud	Garzanti et al. (2014)		26.8	54.6	6.68	26.7	4.6	1.16	4.33	0.67	3.82	0.78	2.15	0.34	2.39	0.31		73.0245	57.0533	48.7591	37.5527	19.9134	13.3333	14.1503	11.5517	10.0262	9.17647	8.63454	13.5556	9.6371	8.15789

## Sheet: references
Andersson, P., Worden, R., Hodgson, D., and Flint, S.: Provenance evolution and chemostratigraphy of a Palaeozoic submarine fan-complex: Tanqua Karoo Basin, South Africa, Marine and Petroleum Geology, 21, 555-577, https://doi.org/10.1016/j.marpetgeo.2004.01.004, 2004.
Galerne, C. Y., Neumann, E.-R., and Planke, S.: Emplacement mechanisms of sill complexes: Information from the geochemical architecture of the Golden Valley Sill Complex, South Africa, Journal of Volcanology and Geothermal Research, 177, 425-440, https://doi.org/10.1016/j.jvolgeores.2008.06.004, 2008.
Garzanti, E., Padoan, M., Setti, M., López-Galindo, A., and Villa, I. M.: Provenance versus weathering control on the composition of tropical river mud (southern Africa), Chemical Geology, 366, 61-74, https://doi.org/10.1016/j.chemgeo.2013.12.016, 2014.
Luttinen, A. V.: Bilateral geochemical asymmetry in the Karoo large igneous province, Scientific reports, 8, 1-11, https://doi.org/10.1038/s41598-018-23661-3, 2018.
McLennan, S. M., Nance, W., and Taylor, S.: Rare earth element-thorium correlations in sedimentary rocks, and the composition of the continental crust, Geochim Cosmochim Ac, 44, 1833-1839, https://doi.org/10.1016/0016-7037(80)90232-x, 1980.
