# Supplementary figures and images for: Driving mechanisms of organic carbon burial in the Early CretaceousSouth Atlantic Cape Basin (DSDP Site 361)
Source: Copernicus journal article supplement (doi:10.5194/cp-2020-15), 2020-03-04

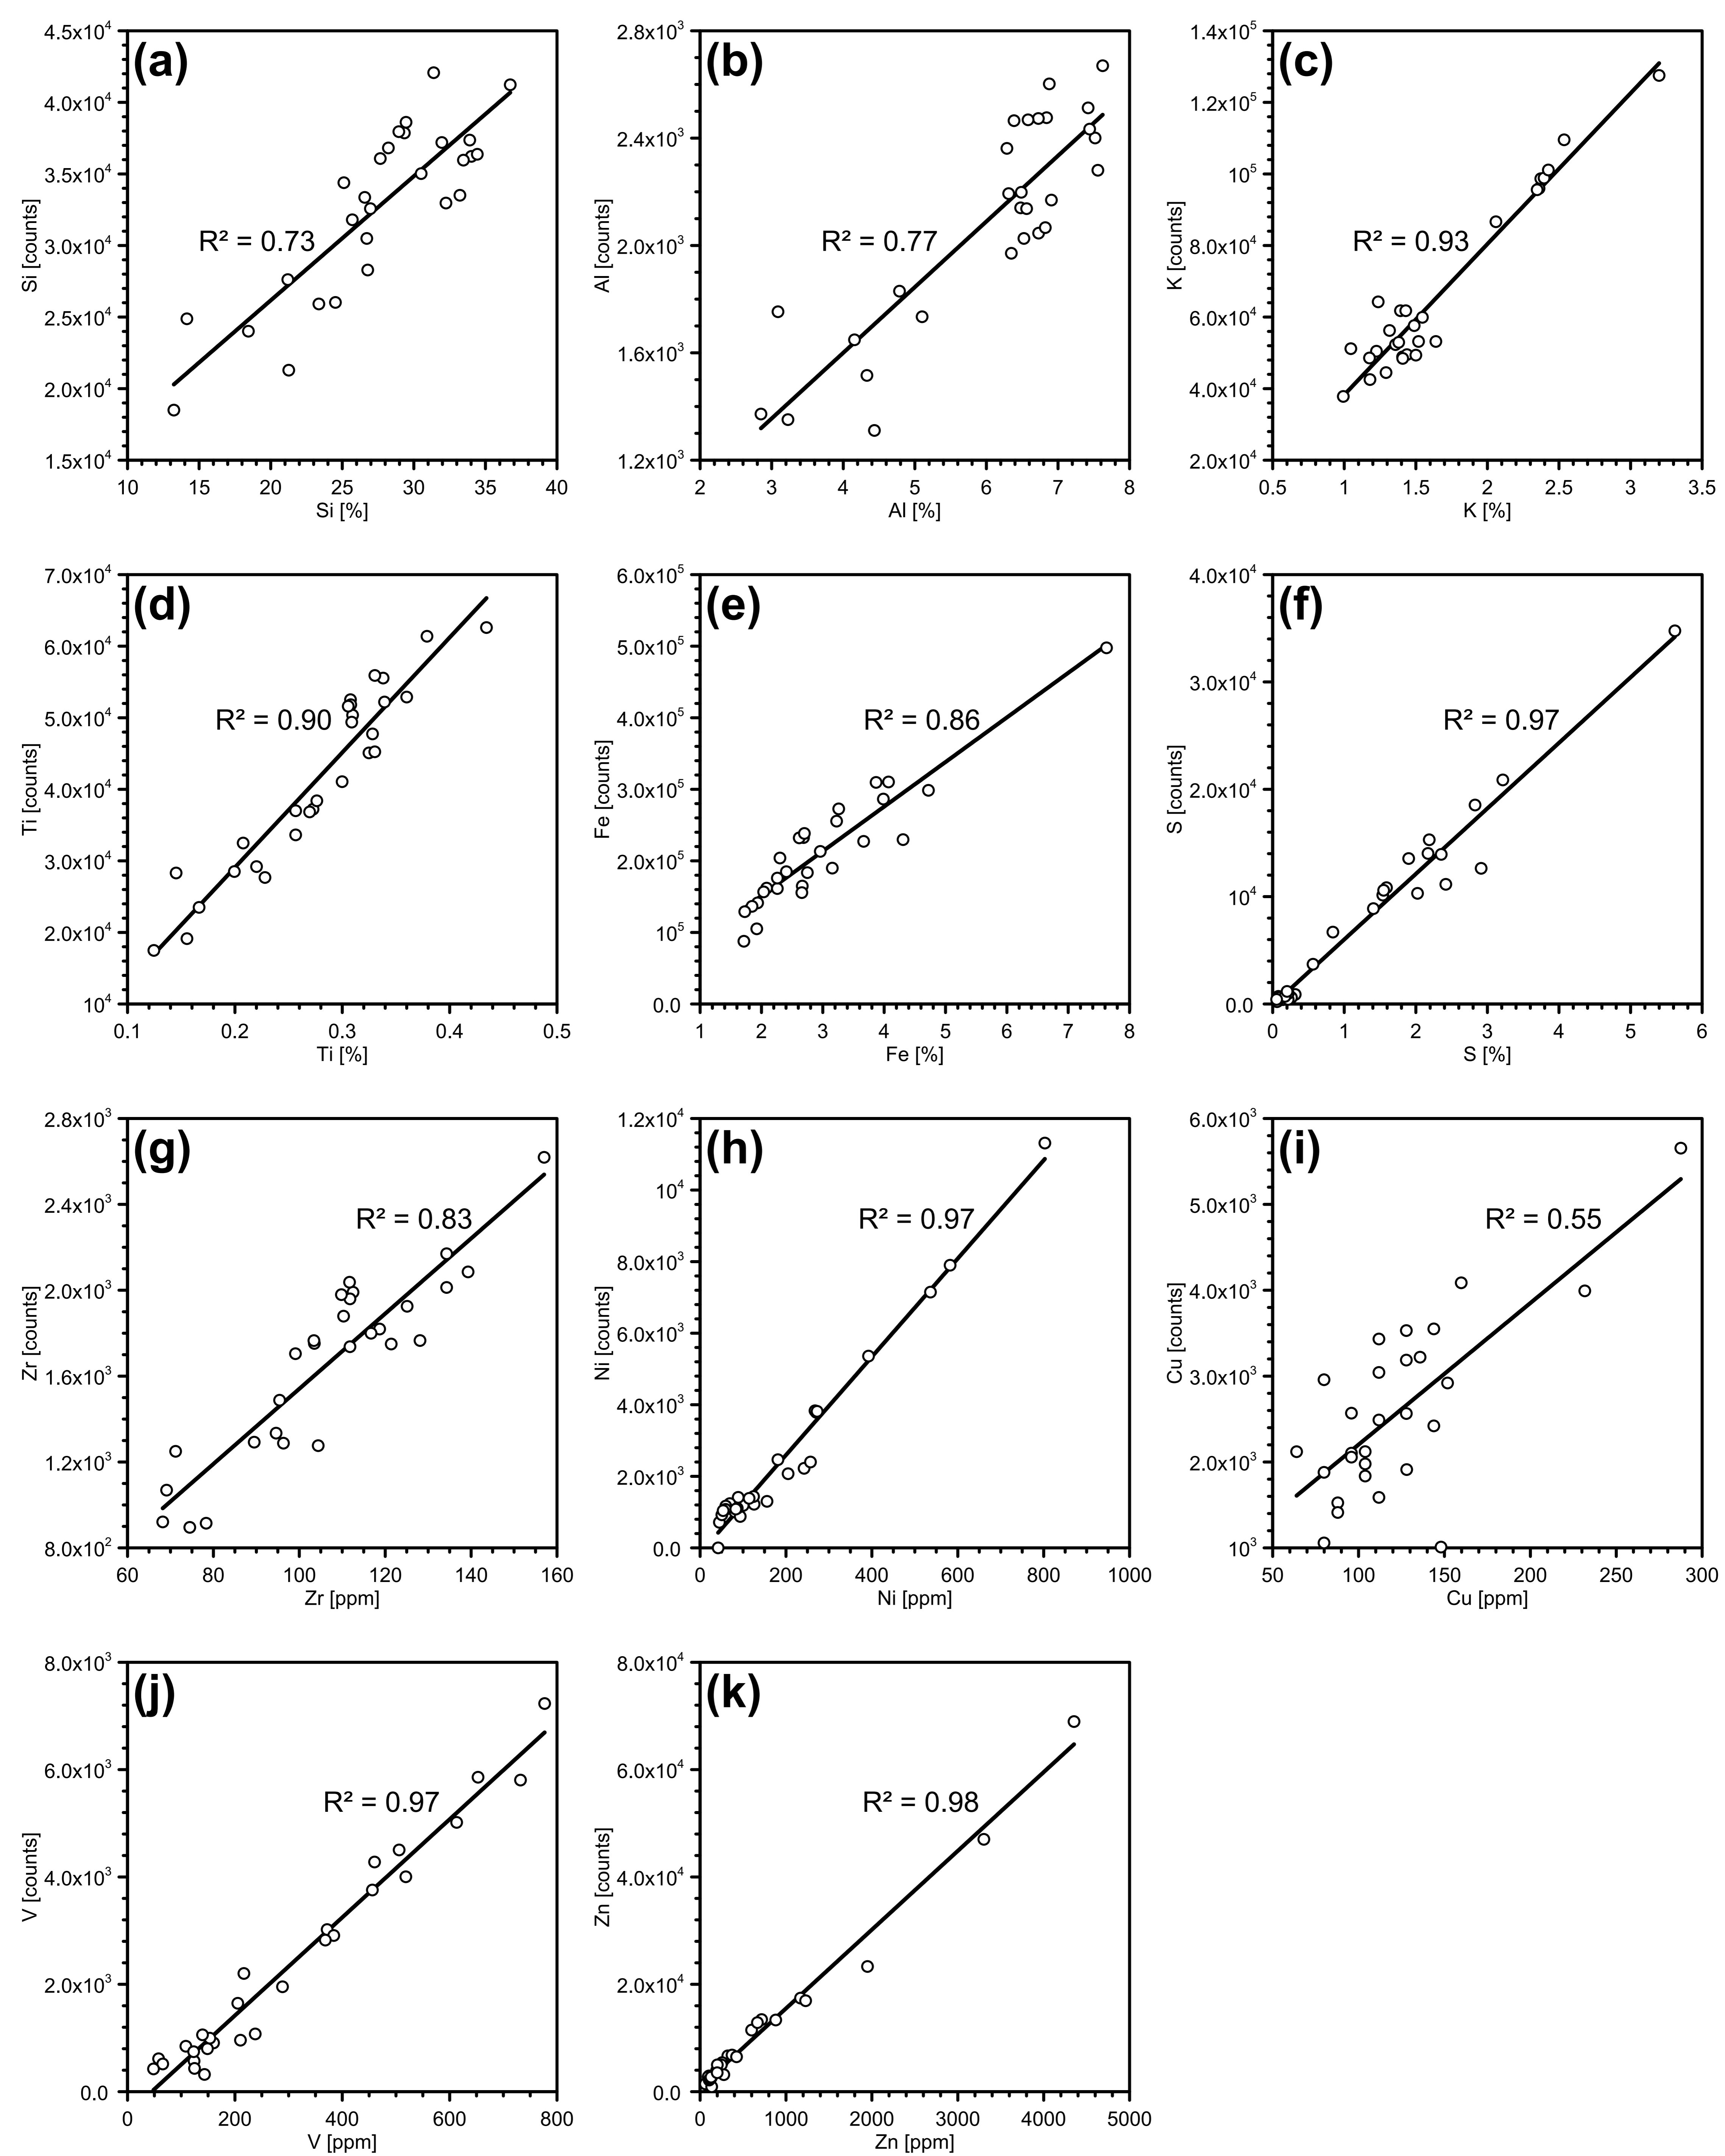

Supplement: Supplementary file 1 [file cp_2020-15_Dummann_et_al_S1.pdf › cp_2020-15_Dummann_et_al_S1.pdf]
